# Supplementary material for: A Network-Based Method to Assess the Statistical Significance of Mild Co-Regulation Effects
Source: PubMed Central journal article supplement (PMC3767771; doi:10.1371/journal.pone.0073413), 2013-09-09
Supplement: pone.0073413.s003.pdf [file pone.0073413.s003.pdf]

| <b>Protein symbol</b> | <b>UniProtKB</b> | <b>Protein name</b>                                                              |
|-----------------------|------------------|----------------------------------------------------------------------------------|
| AKT1                  | P31749           | v-akt murine thymoma viral oncogene homolog 1                                    |
| AKT2                  | P31751           | v-akt murine thymoma viral oncogene homolog 2                                    |
| Cyclin D1             | P24385           | cyclin D1                                                                        |
| Cyclin D3             | P30281           | cyclin D3                                                                        |
| CDK2                  | P24941           | cyclin-dependent kinase 2                                                        |
| CDK4                  | P11802           | cyclin-dependent kinase 4                                                        |
| p27/Kip1              | P46527           | cyclin-dependent kinase inhibitor 1B                                             |
| DUSP6                 | Q16828           | dual specificity phosphatase 6                                                   |
| EGFR                  | P00533           | epidermal growth factor receptor                                                 |
| MIG-6                 | Q9UJM3           | mitogen-inducible gene-6                                                         |
| mTOR                  | P42345           | mechanistic target of rapamycin                                                  |
| GRB2                  | P62993           | growth factor receptor-bound protein 2                                           |
| GSK3B                 | P49841           | glycogen synthase kinase 3 beta                                                  |
| KRAS                  | P01116           | v-Ki-ras2 Kirsten rat sarcoma viral oncogene homolog                             |
| ERK2                  | P28482           | extracellular signal-regulated kinase-2                                          |
| p38                   | Q16539           | MAP kinase p38 alpha                                                             |
| ERK1                  | P27361           | extracellular signal-regulated kinase-1                                          |
| JNK1                  | P45983           | Jun N-terminal Kinase                                                            |
| PIK3CA                | P42336           | phosphoinositide-3-kinase, catalytic, alpha polypeptide                          |
| PIK3CB                | P42338           | phosphoinositide-3-kinase, catalytic, beta polypeptide                           |
| PLCG1                 | P19174           | phospholipase C, gamma 1                                                         |
| PTEN                  | P60484           | phosphatase and tensin homolog                                                   |
| PTPN11                | Q06124           | protein tyrosine phosphatase, non-receptor type 11                               |
| RB1                   | P06400           | retinoblastoma 1                                                                 |
| SHC1                  | P29353           | SHC (Src homology 2 domain containing) transforming protein 1                    |
| STAT3                 | P40763           | signal transducer and activator of transcription 3 (acute-phase response factor) |
