# Supplementary material for: A Network-Based Method to Assess the Statistical Significance of Mild Co-Regulation Effects
Source: PubMed Central journal article supplement (PMC3767771; doi:10.1371/journal.pone.0073413), 2013-09-09
Supplement: pone.0073413.s004.pdf [file pone.0073413.s004.pdf]

# Dharmacon miRIDIAN® microRNA Library- Human Mimic

CS-001005 Lot 08123

| Plate   | Well | Catalog Number | Mature Sanger ID | PreCursor Accession | Mature Sequence         |
|---------|------|----------------|------------------|---------------------|-------------------------|
| Plate 1 | A02  | C-300474-03    | hsa-let-7a       | MI0000061           | UGAGGUAGUAGGUUGUAUAGUU  |
| Plate 1 | A03  | C-300477-03    | hsa-let-7c       | MI0000064           | UGAGGUAGUAGGUUGUAUGGUU  |
| Plate 1 | A04  | C-300482-03    | hsa-miR-15a      | MI0000069           | UAGCAGCACAUAAUGGUUUGUG  |
| Plate 1 | A05  | C-300483-03    | hsa-miR-16       | MI0000070           | UAGCAGCACGUAAAUAUUGGCG  |
| Plate 1 | A06  | C-300488-03    | hsa-miR-19a      | MI0000073           | UGUGCAAUUCUAUGCAAACUGA  |
| Plate 1 | A07  | C-300489-03    | hsa-miR-19b      | MI0000074           | UGUGCAAUCCAUGCAAACUGA   |
| Plate 1 | A08  | C-300491-03    | hsa-miR-20a      | MI0000076           | UAAAGUGCUUAUAGUGCAGGUAG |
| Plate 1 | A09  | C-300492-03    | hsa-miR-21       | MI0000077           | UAGCUUAUCAGACUGAUGUUGA  |
| Plate 1 | A10  | C-300493-03    | hsa-miR-22       | MI0000078           | AAGCUGCCAGUUGAAGAACUGU  |
| Plate 1 | A11  | C-300494-03    | hsa-miR-23a      | MI0000079           | AUCACAUUGCCAGGGAUUUC    |
| Plate 1 | B02  | C-300497-03    | hsa-miR-24       | MI0000081           | UGGCUCAGUUCAGCAGGAACAG  |
| Plate 1 | B03  | C-300502-03    | hsa-miR-27a      | MI0000085           | UUCACAGUGGCUAAGUCCGC    |
| Plate 1 | B04  | C-300505-03    | hsa-miR-30a-5p   | MI0000088           | UGUAAACAUCCUCGACUGGAAG  |
| Plate 1 | B05  | C-300506-03    | hsa-miR-30a-3p   | MI0000088           | CUUUCAGUCGGAUGUUUGCAGC  |
| Plate 1 | B06  | C-300516-03    | hsa-miR-99a      | MI0000101           | AACCCGUAGAUCCGAUCUUGUG  |
| Plate 1 | B07  | C-300517-03    | hsa-miR-100      | MI0000102           | AACCCGUAGAUCCGAACUUGUG  |
| Plate 1 | B08  | C-300522-03    | hsa-miR-103      | MI0000108           | AGCAGCAUUGUACAGGGCUAUGA |
| Plate 1 | B09  | C-300523-03    | hsa-miR-103      | MI0000109           | AGCAGCAUUGUACAGGGCUAUGA |
| Plate 1 | B10  | C-300527-03    | hsa-miR-107      | MI0000114           | AGCAGCAUUGUACAGGGCUAUGA |
| Plate 1 | B11  | C-300528-03    | hsa-miR-192      | MI0000234           | CUGACCUAUGAAUUGACAGCC   |
| Plate 1 | C02  | C-300533-03    | hsa-miR-199a     | MI0000242           | CCCAGUGUUCAGACUACCUGUUC |
| Plate 1 | C03  | C-300537-03    | hsa-miR-208      | MI0000251           | AUAAGACGAGCAAAAAGCUUGU  |
| Plate 1 | C04  | C-300539-03    | hsa-miR-129      | MI0000473           | CUUUUUGCGGUCUGGGCUUGC   |
| Plate 1 | C05  | C-300541-03    | hsa-miR-30c      | MI0000254           | UGUAAACAUCCUACACUCUCAGC |
| Plate 1 | C06  | C-300543-03    | hsa-miR-30d      | MI0000255           | UGUAAACAUCCCGACUGGAAG   |
| Plate 1 | C07  | C-300549-03    | hsa-miR-10a      | MI0000266           | UACCCUGUAGAUCCGAAUUUGUG |
| Plate 1 | C08  | C-300556-03    | hsa-miR-181c     | MI0000271           | AACAUUCAACCGUCGGUGAGU   |
| Plate 1 | C09  | C-300562-03    | hsa-miR-203      | MI0000283           | GUGAAAUGUUUAGGACCACUAG  |
| Plate 1 | C10  | C-300565-03    | hsa-miR-210      | MI0000286           | CUGUGCGUGUGACAGCGGCUGA  |
| Plate 1 | C11  | C-300566-03    | hsa-miR-211      | MI0000287           | UCCCUUUGUCAUCCUUCGCCU   |
| Plate 1 | D02  | C-300567-03    | hsa-miR-212      | MI0000288           | UAACAGUCUCCAGUCACGGCC   |
| Plate 1 | D03  | C-300574-03    | hsa-miR-218      | MI0000295           | UUGUGCUUGAUCUAACCAUGU   |
| Plate 1 | D04  | C-300590-03    | hsa-miR-30b      | MI0000441           | UGUAAACAUCCUACACUCAGCU  |
| Plate 1 | D05  | C-300595-03    | hsa-miR-125b     | MI0000446           | UCCUGAGACCCUAACUUGUGA   |
| Plate 1 | D06  | C-300596-03    | hsa-miR-125b     | MI0000470           | UCCUGAGACCCUAACUUGUGA   |
| Plate 1 | D07  | C-300598-03    | hsa-miR-130a     | MI0000448           | CAGUGCAAUGUAAAAGGGCAU   |
| Plate 1 | D08  | C-300599-03    | hsa-miR-132      | MI0000449           | UAACAGUCUACAGCCAUGGUCG  |
| Plate 1 | D09  | C-300602-03    | hsa-miR-135a     | MI0000452           | UAUGGCUUUUUAUUCCUAUGUGA |
| Plate 1 | D10  | C-300608-03    | hsa-miR-141      | MI0000457           | UAACACUGUCUGGUAAAGAUGG  |
| Plate 1 | D11  | C-300610-03    | hsa-miR-142-3p   | MI0000458           | UGUAGUGUUUCCUACUUAUGGA  |
| Plate 1 | E02  | C-300619-03    | hsa-miR-9        | MI0000467           | UCUUUGGUUAUCUAGCUGUAUGA |
| Plate 1 | E03  | C-300620-03    | hsa-miR-9        | MI0000468           | UCUUUGGUUAUCUAGCUGUAUGA |
| Plate 1 | E04  | C-300627-03    | hsa-miR-127      | MI0000472           | UCGGAUCCGUCUGAGCUUGGCU  |
| Plate 1 | E05  | C-300629-03    | hsa-miR-136      | MI0000475           | ACUCCAUUUGUUUUGAUGAUGGA |

|         |     |             |                |           |                          |
|---------|-----|-------------|----------------|-----------|--------------------------|
| Plate 1 | E06 | C-300630-03 | hsa-miR-146a   | MI0000477 | UGAGAACUGAAUCCAUGGGUU    |
| Plate 1 | E07 | C-300632-03 | hsa-miR-150    | MI0000479 | UCUCCCAACCCUUGUACCAGUG   |
| Plate 1 | E08 | C-300633-03 | hsa-miR-154    | MI0000480 | UAGGUUAUCCGUGUUGCCUUCG   |
| Plate 1 | E09 | C-300634-03 | hsa-miR-154*   | MI0000480 | AAUCAUACACGGUUGACCUAUU   |
| Plate 1 | E10 | C-300635-03 | hsa-miR-184    | MI0000481 | UGGACGGAGAACUGAUAAAGGGU  |
| Plate 1 | E11 | C-300639-03 | hsa-miR-190    | MI0000486 | UGAU AUGUUUGAUUAUUAGGU   |
| Plate 1 | F02 | C-300642-03 | hsa-miR-194    | MI0000732 | UGU AACAGCAACUCCAUGUGGA  |
| Plate 1 | F03 | C-300643-03 | hsa-miR-195    | MI0000489 | UAGCAGCACAGAAAUAUUGGC    |
| Plate 1 | F04 | C-300644-03 | hsa-miR-206    | MI0000490 | UGGAAUGUAAGGAAGUGUGUGG   |
| Plate 1 | F05 | C-300654-03 | hsa-miR-34b    | MI0000742 | UAGGCAGUGUCAUUAGCUGAUUG  |
| Plate 1 | F06 | C-300655-03 | hsa-miR-34c    | MI0000743 | AGGCAGUGUAGUUAGCUGAUUGC  |
| Plate 1 | F07 | C-300656-03 | hsa-miR-299-3p | MI0000744 | UAUGUGGGAUGGUAAACCGCUU   |
| Plate 1 | F08 | C-300657-03 | hsa-miR-301    | MI0000745 | CAGUGCAAUAGUAUUGUCA AAGC |
| Plate 1 | F09 | C-300658-03 | hsa-miR-99b    | MI0000746 | CACCCGUAGAACCGACCUUGCG   |
| Plate 1 | F10 | C-300659-03 | hsa-miR-296    | MI0000747 | AGGGCCCCCCCUC AAUCCUGU   |
| Plate 1 | F11 | C-300666-03 | hsa-miR-365    | MI0000767 | UAAUGCCCCUAAAAAUCCUUAU   |
| Plate 1 | G02 | C-300667-03 | hsa-miR-365    | MI0000769 | UAAUGCCCCUAAAAAUCCUUAU   |
| Plate 1 | G03 | C-300675-03 | hsa-miR-369-3p | MI0000777 | AAUAAUACAUGGUUGAUCUUU    |
| Plate 1 | G04 | C-300678-03 | hsa-miR-372    | MI0000780 | AAAGUGCUGCGACAUUUGAGCGU  |
| Plate 1 | G05 | C-300679-03 | hsa-miR-373*   | MI0000781 | ACUCAAAAUGGGGGCGCUUCC    |
| Plate 1 | G06 | C-300680-03 | hsa-miR-373    | MI0000781 | GAAGUGC UUUGAUUUUGGGGUGU |
| Plate 1 | G07 | C-300683-03 | hsa-miR-376a   | MI0000784 | AUCAUAGAGGAAAAUCCACGU    |
| Plate 1 | G08 | C-300857-01 | hsa-miR-376a   | MI0003529 | AUCAUAGAGGAAAAUCCACGU    |
| Plate 1 | G09 | C-300684-03 | hsa-miR-377    | MI0000785 | AUCACACAAAGGCAACUUUUGU   |
| Plate 1 | G10 | C-300685-03 | hsa-miR-378    | MI0000786 | CUCCUGACUCCAGGUCCUGUGU   |
| Plate 1 | G11 | C-300688-03 | hsa-miR-380-5p | MI0000788 | UGGUUGACCAUAGAACAUGC GC  |
| Plate 1 | H02 | C-300689-03 | hsa-miR-380-3p | MI0000788 | UAUGUAAUAUGGUCCACAUCUU   |
| Plate 1 | H03 | C-300690-03 | hsa-miR-381    | MI0000789 | UAUACAAGGGCAAGCUCUCUGU   |
| Plate 1 | H04 | C-300691-03 | hsa-miR-382    | MI0000790 | GAAGUUGUUCGUGGUGGAUUCG   |
| Plate 1 | H05 | C-300692-03 | hsa-miR-383    | MI0000791 | AGAUCAGAAGGUGAUUGUGGCU   |
| Plate 1 | H06 | C-300694-03 | hsa-miR-330    | MI0000803 | GCAAAGCACACGGCCUGCAGAGA  |
| Plate 1 | H07 | C-300695-03 | hsa-miR-328    | MI0000804 | CUGGCCUCUCUGCCCUUCCGU    |
| Plate 1 | H08 | C-300699-03 | hsa-miR-326    | MI0000808 | CCUCUGGGCCCUUCCUCCAG     |
| Plate 1 | H09 | C-300702-03 | hsa-miR-148b   | MI0000811 | UCAGUGCAUCACAGAACUUUGU   |
| Plate 1 | H10 | C-300704-03 | hsa-miR-324-5p | MI0000813 | CGCAUCCCUUAGGGCAUUGGUGU  |
| Plate 1 | H11 | C-300712-03 | hsa-miR-346    | MI0000826 | UGUCUGCCCGCAUGCCUGCCUCU  |
| Plate 2 | A02 | C-300723-03 | hsa-miR-449    | MI0001648 | UGGCAGUGUAUUGUUAGCUGGU   |
| Plate 2 | A03 | C-300726-03 | hsa-miR-191*   | MI0000465 | GCUGCGCUUGGAUUUCGUCCCC   |
| Plate 2 | A04 | C-300728-03 | hsa-miR-369-5p | MI0000777 | AGAUCGACCGUGUUUAUUCGC    |
| Plate 2 | A05 | C-300729-03 | hsa-miR-431    | MI0001721 | UGUCUUGCAGGCCGUAUGCA     |
| Plate 2 | A06 | C-300730-03 | hsa-miR-433    | MI0001723 | AUCAUGAUGGGCUCCUCGGUGU   |
| Plate 2 | A07 | C-300731-03 | hsa-miR-329    | MI0001725 | AACACACCUGGUUAACCUCUUU   |
| Plate 2 | A08 | C-300732-03 | hsa-miR-329    | MI0001726 | AACACACCUGGUUAACCUCUUU   |
| Plate 2 | A09 | C-300739-03 | hsa-miR-412    | MI0002464 | ACUUCACCUGGUCCACUAGCCGU  |
| Plate 2 | A10 | C-300740-03 | hsa-miR-410    | MI0002465 | AAUAUAACACAGAUGGCCUGU    |
| Plate 2 | A11 | C-300741-03 | hsa-miR-376b   | MI0002466 | AUCAUAGAGGAAAAUCCAUGUU   |
| Plate 2 | B02 | C-300743-03 | hsa-miR-484    | MI0002468 | UCAGGCUCAGUCCCCUCCCGAU   |

|         |     |             |                |           |                          |
|---------|-----|-------------|----------------|-----------|--------------------------|
| Plate 2 | B03 | C-300744-03 | hsa-miR-485-5p | MI0002469 | AGAGGCUGGCCGUGAUGAAUUC   |
| Plate 2 | B04 | C-300745-03 | hsa-miR-485-3p | MI0002469 | GUCAUACACGGCUCUCCUCUCU   |
| Plate 2 | B05 | C-300746-03 | hsa-miR-486    | MI0002470 | UCCUGUACUGAGCUGCCCCGAG   |
| Plate 2 | B06 | C-300747-03 | hsa-miR-487    | MI0002471 | AAUCAUACAGGGACAUCCAGUU   |
| Plate 2 | B07 | C-300752-03 | hsa-miR-511    | MI0003127 | GUGUCUUUUGCUCUCGCAGUCA   |
| Plate 2 | B08 | C-300753-03 | hsa-miR-511    | MI0003128 | GUGUCUUUUGCUCUCGCAGUCA   |
| Plate 2 | B09 | C-300754-03 | hsa-miR-146b   | MI0003129 | UGAGAACUGAAUUCCAUAGGCU   |
| Plate 2 | B10 | C-300758-03 | hsa-miR-493    | MI0003132 | UUGUACAUGGUAGGCUUUCAU    |
| Plate 2 | B11 | C-300759-03 | hsa-miR-432    | MI0003133 | UCUUGGAGUAGGUCAUUGGGUGG  |
| Plate 2 | C02 | C-300760-03 | hsa-miR-432*   | MI0003133 | CUGGAUGGCUCUCCAUGUCU     |
| Plate 2 | C03 | C-300765-03 | hsa-miR-497    | MI0003138 | CAGCAGCACACUGUGGUUUUGU   |
| Plate 2 | C04 | C-300767-03 | hsa-miR-512-5p | MI0003140 | CACUCAGCCUUGAGGGCACUUUC  |
| Plate 2 | C05 | C-300768-03 | hsa-miR-512-5p | MI0003141 | CACUCAGCCUUGAGGGCACUUUC  |
| Plate 2 | C06 | C-300769-03 | hsa-miR-512-3p | MI0003140 | AAGUGCUGUCAUAGCUGAGGUC   |
| Plate 2 | C07 | C-300770-03 | hsa-miR-512-3p | MI0003141 | AAGUGCUGUCAUAGCUGAGGUC   |
| Plate 2 | C08 | C-300771-03 | hsa-miR-498    | MI0003142 | UUUCAAGCCAGGGGGCGUUUUUC  |
| Plate 2 | C09 | C-300772-03 | hsa-miR-520e   | MI0003143 | AAAGUGCUUCCUUUUUGAGGG    |
| Plate 2 | C10 | C-300773-03 | hsa-miR-515-5p | MI0003144 | UUCUCCAAAAGAAAGCACUUUCUG |
| Plate 2 | C11 | C-300774-03 | hsa-miR-515-5p | MI0003147 | UUCUCCAAAAGAAAGCACUUUCUG |
| Plate 2 | D02 | C-300777-03 | hsa-miR-519e*  | MI0003145 | UUCUCCAAAAGGGAGCACUUUC   |
| Plate 2 | D03 | C-300779-03 | hsa-miR-520f   | MI0003146 | AAGUGCUIUCCUUUUAGAGGGUU  |
| Plate 2 | D04 | C-300786-03 | hsa-miR-519c   | MI0003148 | AAAGUGCAUCUUUUUAGAGGAU   |
| Plate 2 | D05 | C-300787-03 | hsa-miR-520a*  | MI0003149 | CUCCAGAGGGAAGUACUUUCU    |
| Plate 2 | D06 | C-300788-03 | hsa-miR-520a   | MI0003149 | AAAGUGCUIUCCUUUGGACUGU   |
| Plate 2 | D07 | C-300792-03 | hsa-miR-525    | MI0003152 | CUCCAGAGGGAUGCACUUUCU    |
| Plate 2 | D08 | C-300797-03 | hsa-miR-520b   | MI0003155 | AAAGUGCUIUCCUUUAGAGGG    |
| Plate 2 | D09 | C-300798-03 | hsa-miR-518b   | MI0003156 | CAAAGCGCUCCCCUUUAGAGGU   |
| Plate 2 | D10 | C-300804-03 | hsa-miR-518c*  | MI0003159 | UCUCUGGAGGGAAGCACUUUCUG  |
| Plate 2 | D11 | C-300806-03 | hsa-miR-524*   | MI0003160 | CUACAAAGGGAAGCACUUUCUC   |
| Plate 2 | E02 | C-300807-03 | hsa-miR-524    | MI0003160 | GAAGGCGCUUCCCUUUGGAGU    |
| Plate 2 | E03 | C-300808-03 | hsa-miR-517*   | MI0003161 | CCUCUAGAUGGAAGCACUGUCU   |
| Plate 2 | E04 | C-300809-03 | hsa-miR-517*   | MI0003165 | CCUCUAGAUGGAAGCACUGUCU   |
| Plate 2 | E05 | C-300810-03 | hsa-miR-517*   | MI0003174 | CCUCUAGAUGGAAGCACUGUCU   |
| Plate 2 | E06 | C-300813-03 | hsa-miR-521    | MI0003163 | AACGCACUUCCCUUAGAGUGU    |
| Plate 2 | E07 | C-300814-03 | hsa-miR-521    | MI0003176 | AACGCACUUCCCUUAGAGUGU    |
| Plate 2 | E08 | C-300817-03 | hsa-miR-517b   | MI0003165 | UCGUGCAUCCCUUUAGAGUGUU   |
| Plate 2 | E09 | C-300818-03 | hsa-miR-520g   | MI0003166 | ACAAAGUGCUUCCCUUUAGAGUGU |
| Plate 2 | E10 | C-300821-03 | hsa-miR-516-3p | MI0003167 | UGCUUCCUUUCAGAGGGU       |
| Plate 2 | E11 | C-300822-03 | hsa-miR-516-3p | MI0003172 | UGCUUCCUUUCAGAGGGU       |
| Plate 2 | F02 | C-300823-03 | hsa-miR-516-3p | MI0003180 | UGCUUCCUUUCAGAGGGU       |
| Plate 2 | F03 | C-300824-03 | hsa-miR-516-3p | MI0003181 | UGCUUCCUUUCAGAGGGU       |
| Plate 2 | F04 | C-300830-03 | hsa-miR-518d   | MI0003171 | CAAAGCGCUUCCCUUUGGAGC    |
| Plate 2 | F05 | C-300832-03 | hsa-miR-517c   | MI0003174 | AUCGUGCAUCCUUUAGAGUGU    |
| Plate 2 | F06 | C-300833-03 | hsa-miR-520h   | MI0003175 | ACAAAGUGCUUCCCUUUAGAGU   |
| Plate 2 | F07 | C-300854-03 | hsa-miR-299-5p | MI0000744 | UGGUUUACCGUCCCAUACAU     |
| Plate 2 | F08 | C-300859-01 | hsa-miR-539    | MI0003514 | GGAGAAAUUAUCCUUGGUGUGU   |
| Plate 2 | F09 | C-300862-01 | hsa-miR-487b   | MI0003530 | AAUCGUACAGGGUCAUCCACUU   |
| Plate 2 | F10 | C-300867-01 | hsa-miR-532    | MI0003205 | CAUGCCUUGAGUGUAGGACCGU   |

|         |     |             |              |           |                           |
|---------|-----|-------------|--------------|-----------|---------------------------|
| Plate 2 | F11 | C-300868-01 | hsa-miR-551a | MI0003556 | GCGACCCACUCUUGGUUUCCA     |
| Plate 2 | G02 | C-300869-01 | hsa-miR-552  | MI0003557 | AACAGGUGACUGGUUAGACAA     |
| Plate 2 | G03 | C-300870-01 | hsa-miR-553  | MI0003558 | AAAACGGUGAGAUUUUGUUUU     |
| Plate 2 | G04 | C-300871-01 | hsa-miR-554  | MI0003559 | GCUAGUCCUGACUCAGCCAGU     |
| Plate 2 | G05 | C-300873-01 | hsa-miR-555  | MI0003561 | AGGGUAAGCUGAACCUCUGAU     |
| Plate 2 | G06 | C-300875-01 | hsa-miR-557  | MI0003563 | GUUUGCACGGGUGGGCCUUGUCU   |
| Plate 2 | G07 | C-300876-01 | hsa-miR-558  | MI0003564 | UGAGCUGCUGUACCAAAAU       |
| Plate 2 | G08 | C-300877-01 | hsa-miR-559  | MI0003565 | UAAAGUAAAUAUGCACCAAAA     |
| Plate 2 | G09 | C-300879-01 | hsa-miR-561  | MI0003567 | CAAAGUUUAAGAUCCUUGAAGU    |
| Plate 2 | G10 | C-300880-01 | hsa-miR-562  | MI0003568 | AAAGUAGCUGUACCAUUUGC      |
| Plate 2 | G11 | C-300881-01 | hsa-miR-563  | MI0003569 | AGGUUGACAUACGUUUCCC       |
| Plate 2 | H02 | C-300882-01 | hsa-miR-564  | MI0003570 | AGGCACGGUGUCAGCAGGC       |
| Plate 2 | H03 | C-300884-01 | hsa-miR-566  | MI0003572 | GGGCGCCUGUGAUCCCAAC       |
| Plate 2 | H04 | C-300885-01 | hsa-miR-567  | MI0003573 | AGUAUGUUCUCCAGGACAGAAC    |
| Plate 2 | H05 | C-300886-01 | hsa-miR-568  | MI0003574 | AUGUAUAAAUGUAUACACAC      |
| Plate 2 | H06 | C-300887-01 | hsa-miR-551b | MI0003575 | GCGACCCAUAUCUUGGUUUCAG    |
| Plate 2 | H07 | C-300888-01 | hsa-miR-569  | MI0003576 | AGUUA AUGAAUCCUGGAAAGU    |
| Plate 2 | H08 | C-300890-01 | hsa-miR-571  | MI0003578 | UGAGUUGGCCAUCUGAGUGAG     |
| Plate 2 | H09 | C-300891-01 | hsa-miR-572  | MI0003579 | GUCCGCUCGGCGGUGGCCCA      |
| Plate 2 | H10 | C-300892-01 | hsa-miR-573  | MI0003580 | CUGAAGUGAUGUGUAACUGAUCAG  |
| Plate 2 | H11 | C-300894-01 | hsa-miR-575  | MI0003582 | GAGCCAGUUGGACAGGAGC       |
| Plate 3 | A02 | C-300896-01 | hsa-miR-577  | MI0003584 | UAGAUAAAUAUUGGUACCUG      |
| Plate 3 | A03 | C-300897-01 | hsa-miR-578  | MI0003585 | CUUCUUGUGCUCUAGGAUUGU     |
| Plate 3 | A04 | C-300899-01 | hsa-miR-580  | MI0003587 | UUGAGAAUGAUGAAUCAUUAGG    |
| Plate 3 | A05 | C-300900-01 | hsa-miR-581  | MI0003588 | UCUUGUGUUCUCUAGAUCAGU     |
| Plate 3 | A06 | C-300901-01 | hsa-miR-582  | MI0003589 | UUACAGUUGUUCAACCAGUUACU   |
| Plate 3 | A07 | C-300902-01 | hsa-miR-583  | MI0003590 | CAAAGAGGAAGGUCCCAUUAC     |
| Plate 3 | A08 | C-300903-01 | hsa-miR-584  | MI0003591 | UUAUGGUUUUGCCUGGGACUGAG   |
| Plate 3 | A09 | C-300904-01 | hsa-miR-585  | MI0003592 | UGGGCGUAUCUGUAUGCUA       |
| Plate 3 | A10 | C-300905-01 | hsa-miR-548a | MI0003593 | CAAACUGGCAAUUACUUUUGC     |
| Plate 3 | A11 | C-300906-01 | hsa-miR-586  | MI0003594 | UAUGCAUUGUAUUUUUAGGUCC    |
| Plate 3 | B02 | C-300907-01 | hsa-miR-587  | MI0003595 | UUUCCAUAGGUGAUGAGUCAC     |
| Plate 3 | B03 | C-300908-01 | hsa-miR-548b | MI0003596 | CAAGAACCUCAGUUGCUUUUGU    |
| Plate 3 | B04 | C-300909-01 | hsa-miR-588  | MI0003597 | UUGGCCACAAUGGGUUAGAAC     |
| Plate 3 | B05 | C-300910-01 | hsa-miR-548a | MI0003598 | CAAACUGGCAAUUACUUUUGC     |
| Plate 3 | B06 | C-300911-01 | hsa-miR-589  | MI0003599 | UCAGAACAAAUGCCGGUUCCCAGA  |
| Plate 3 | B07 | C-300912-01 | hsa-miR-550  | MI0003600 | UGUCUUACUCCCUCAGGCACAU    |
| Plate 3 | B08 | C-300913-01 | hsa-miR-550  | MI0003601 | UGUCUUACUCCCUCAGGCACAU    |
| Plate 3 | B09 | C-300914-01 | hsa-miR-590  | MI0003602 | GAGCUUAUUCAUAAAAGUGCAG    |
| Plate 3 | B10 | C-300915-01 | hsa-miR-591  | MI0003603 | AGACCAUGGGUUCUCAUUGU      |
| Plate 3 | B11 | C-300916-01 | hsa-miR-592  | MI0003604 | UUGUGUCAUAUGCGAUGAUGU     |
| Plate 3 | C02 | C-300917-01 | hsa-miR-593  | MI0003605 | AGGCACCAGCCAGGCAUUGCUCAGC |
| Plate 3 | C03 | C-300919-01 | hsa-miR-595  | MI0003607 | GAAGUGUGCCGUGGUGUGUCU     |
| Plate 3 | C04 | C-300920-01 | hsa-miR-596  | MI0003608 | AAGCCUGCCC GGCUCCUCGGG    |
| Plate 3 | C05 | C-300921-01 | hsa-miR-597  | MI0003609 | UGUGUCACUCGAUGACCACUGU    |
| Plate 3 | C06 | C-300922-01 | hsa-miR-598  | MI0003610 | UACGUCAUCGUUGUCAUCGUCA    |
| Plate 3 | C07 | C-300923-01 | hsa-miR-599  | MI0003611 | GUUGUGUCAGUUUAUCAAAC      |

|         |     |             |                |           |                           |
|---------|-----|-------------|----------------|-----------|---------------------------|
| Plate 3 | C08 | C-300924-01 | hsa-miR-548a   | MI0003612 | CAAAACUGGCAAUUACUUUUGC    |
| Plate 3 | C09 | C-300925-01 | hsa-miR-600    | MI0003613 | ACUUACAGACAAGAGCCUUGCUC   |
| Plate 3 | C10 | C-300926-01 | hsa-miR-601    | MI0003614 | UGGUCUAGGAUUGUUGGAGGAG    |
| Plate 3 | C11 | C-301017-01 | hsa-let-7e*    | MI0000066 | CUAUACGGCCUCCUAGCUUUCC    |
| Plate 3 | D02 | C-301018-01 | hsa-miR-15a*   | MI0000069 | CAGGCCAUUUUGUGCUGCCUCA    |
| Plate 3 | D03 | C-301019-01 | hsa-miR-16-1*  | MI0000070 | CCAGUAUUAACUGUGCUGCUGA    |
| Plate 3 | D04 | C-301016-01 | hsa-let-7c*    | MI0000064 | UAGAGUUACACCCUGGGAGUUA    |
| Plate 3 | D05 | C-301020-01 | hsa-miR-19a*   | MI0000073 | AGUUUUGCAUAGUUGCACUACA    |
| Plate 3 | D06 | C-301021-01 | hsa-miR-19b-1* | MI0000074 | AGUUUUGCAGGUUUGCAUCCAGC   |
| Plate 3 | D07 | C-301022-01 | hsa-miR-20a*   | MI0000076 | ACUGCAUUAUGAGCACUUAAAG    |
| Plate 3 | D08 | C-301023-01 | hsa-miR-21*    | MI0000077 | CAACACCAGUCGAUGGGCUGU     |
| Plate 3 | D09 | C-301024-01 | hsa-miR-22*    | MI0000078 | AGUUCUUCAGUGGCAAGCUUUA    |
| Plate 3 | D10 | C-301025-01 | hsa-miR-23a*   | MI0000079 | GGGGUUCUGGGGAUGGGAUUU     |
| Plate 3 | D11 | C-301026-01 | hsa-miR-24-2*  | MI0000081 | UGCCUACUGAGCUGAAACACAG    |
| Plate 3 | E02 | C-301027-01 | hsa-miR-26a-1* | MI0000083 | CCUAUUCUUGGUUACUUGCACG    |
| Plate 3 | E03 | C-301028-01 | hsa-miR-27a*   | MI0000085 | AGGGCUUAGCUGCUUGUGAGCA    |
| Plate 3 | E04 | C-301029-01 | hsa-miR-31*    | MI0000089 | UGCUAUGCCAACAUUUUGCCAU    |
| Plate 3 | E05 | C-301030-01 | hsa-miR-92a-1* | MI0000093 | AGGUUGGGAUCGGUUGCAAUGCU   |
| Plate 3 | E06 | C-301031-01 | hsa-miR-99a*   | MI0000101 | CAAGCUCGCUUCUAUGGGUCUG    |
| Plate 3 | E07 | C-301032-01 | hsa-miR-100*   | MI0000102 | CAAGCUUGUAUCUAUAGGUAUG    |
| Plate 3 | E08 | C-301033-01 | hsa-miR-192*   | MI0000234 | CUGCCAAUUCCAUAGGUCACAG    |
| Plate 3 | E09 | C-301034-01 | hsa-miR-30c-2* | MI0000254 | CUGGGAGAAGGCUGUUUACUCU    |
| Plate 3 | E10 | C-301035-01 | hsa-miR-30d*   | MI0000255 | CUUUCAGUCAGAUGUUUGCUGC    |
| Plate 3 | E11 | C-301036-01 | hsa-miR-139-3p | MI0000261 | GGAGACGCGGCCUGUUGGAGU     |
| Plate 3 | F02 | C-301037-01 | hsa-miR-7-2*   | MI0000264 | CAACAAUCCAGUCUACCUAA      |
| Plate 3 | F03 | C-301038-01 | hsa-miR-10a*   | MI0000266 | CAAAUUCGUAUCUAGGGGAUA     |
| Plate 3 | F04 | C-300927-01 | hsa-miR-602    | MI0003615 | GACACGGGCGACAGCUGCGGCC    |
| Plate 3 | F05 | C-300928-01 | hsa-miR-603    | MI0003616 | CACACACUGCAAUUACUUUUGC    |
| Plate 3 | F06 | C-300929-01 | hsa-miR-604    | MI0003617 | AGGCUGCGGAAUUCAGGAC       |
| Plate 3 | F07 | C-300930-01 | hsa-miR-605    | MI0003618 | UAAAUCCCAUGGUGCCUUCUCCU   |
| Plate 3 | F08 | C-300931-01 | hsa-miR-606    | MI0003619 | AAACUACUGAAAAUCAAGAU      |
| Plate 3 | F09 | C-300932-01 | hsa-miR-607    | MI0003620 | GUUCAAAUCCAGAUCUAUAAAC    |
| Plate 3 | F10 | C-300933-01 | hsa-miR-608    | MI0003621 | AGGGGUGGUGUUGGGACAGCUCCGU |
| Plate 3 | F11 | C-300934-01 | hsa-miR-609    | MI0003622 | AGGGUGUUUCUCUCAUCUCU      |
| Plate 3 | G02 | C-300935-01 | hsa-miR-610    | MI0003623 | UGAGCUAAAUGUGUGCUGGGA     |
| Plate 3 | G03 | C-300936-01 | hsa-miR-611    | MI0003624 | GCGAGGACCCCUCGGGGUCUGAC   |
| Plate 3 | G04 | C-300937-01 | hsa-miR-612    | MI0003625 | GCUGGGCAGGGCUUCUGAGCUCCUU |
| Plate 3 | G05 | C-300938-01 | hsa-miR-613    | MI0003626 | AGGAAUGUCCUUCUUUGCC       |
| Plate 3 | G06 | C-300939-01 | hsa-miR-614    | MI0003627 | GAACGCCUGUUCUUGCCAGGUGG   |
| Plate 3 | G07 | C-300941-01 | hsa-miR-616    | MI0003629 | ACUCAAACCCUUCAGUGACUU     |
| Plate 3 | G08 | C-300942-01 | hsa-miR-548c   | MI0003630 | CAAAAUCUCAAUUACUUUUGC     |
| Plate 3 | G09 | C-300943-01 | hsa-miR-617    | MI0003631 | AGACUUCCCAUUUGAAGGUGGC    |
| Plate 3 | G10 | C-300944-01 | hsa-miR-618    | MI0003632 | AAACUCUACUUGUCCUUCUGAGU   |
| Plate 3 | G11 | C-300945-01 | hsa-miR-619    | MI0003633 | GACCUGGACAUGUUUGUGCCCAGU  |
| Plate 3 | H02 | C-300946-01 | hsa-miR-620    | MI0003634 | AUGGAGAUAGAUUAGAAAU       |
| Plate 3 | H03 | C-300947-01 | hsa-miR-621    | MI0003635 | GGCUAGCAACAGCGCUUACCU     |
| Plate 3 | H04 | C-300948-01 | hsa-miR-622    | MI0003636 | ACAGUCUGCUGAGGUUGGAGC     |
| Plate 3 | H05 | C-300949-01 | hsa-miR-623    | MI0003637 | AUCCCUUGCAGGGGCUGUUGGGU   |

|         |     |             |                |           |                           |
|---------|-----|-------------|----------------|-----------|---------------------------|
| Plate 3 | H06 | C-300950-01 | hsa-miR-624    | MI0003638 | UAGUACCAGUACCUUGUGUUCA    |
| Plate 3 | H07 | C-300952-01 | hsa-miR-626    | MI0003640 | AGCUGUCUGAAAAUGUCUU       |
| Plate 3 | H08 | C-300953-01 | hsa-miR-627    | MI0003641 | GUGAGUCUCUAAGAAAAGAGGA    |
| Plate 3 | H09 | C-300955-01 | hsa-miR-629    | MI0003643 | GUUCUCCCAACGUAAGCCCAGC    |
| Plate 3 | H10 | C-300956-01 | hsa-miR-630    | MI0003644 | AGUAUUCUGUACCAGGGAAGGU    |
| Plate 3 | H11 | C-300957-01 | hsa-miR-631    | MI0003645 | AGACCUGGCCCAGACCUCAGC     |
| Plate 4 | A02 | C-300959-01 | hsa-miR-632    | MI0003647 | GUGUCUGCUUCCUGUGGGA       |
| Plate 4 | A03 | C-300960-01 | hsa-miR-633    | MI0003648 | CUAAUAGUAUCUACCACAAUAAA   |
| Plate 4 | A04 | C-300961-01 | hsa-miR-634    | MI0003649 | AACCAGCACCCCAACUUUGGAC    |
| Plate 4 | A05 | C-300962-01 | hsa-miR-635    | MI0003650 | ACUUGGGCACUGAAACAAUGUCC   |
| Plate 4 | A06 | C-300964-01 | hsa-miR-637    | MI0003652 | ACUGGGGGCUUUCGGGCUCUGCGU  |
| Plate 4 | A07 | C-300965-01 | hsa-miR-638    | MI0003653 | AGGGAUCGCGGGCGGGUGGCGGCCU |
| Plate 4 | A08 | C-300966-01 | hsa-miR-639    | MI0003654 | AUCGCUGCGGUUGCGAGCGCUGU   |
| Plate 4 | A09 | C-300967-01 | hsa-miR-640    | MI0003655 | AUGAUCCAGGAACCUGCCUCU     |
| Plate 4 | A10 | C-300968-01 | hsa-miR-641    | MI0003656 | AAAGACAUAGGAUAGAGUCACCUC  |
| Plate 4 | A11 | C-300969-01 | hsa-miR-642    | MI0003657 | GUCCCUCUCCAAAUGUGUCUUG    |
| Plate 4 | B02 | C-300970-01 | hsa-miR-643    | MI0003658 | ACUUGUAUGCUAGCUCAGGUAG    |
| Plate 4 | B03 | C-300971-01 | hsa-miR-644    | MI0003659 | AGUGUGGCUUUCUUAGAGC       |
| Plate 4 | B04 | C-300972-01 | hsa-miR-645    | MI0003660 | UCUAGGCUGGUACUGCUGA       |
| Plate 4 | B05 | C-300973-01 | hsa-miR-646    | MI0003661 | AAGCAGCUGCCUCUGAGGC       |
| Plate 4 | B06 | C-300974-01 | hsa-miR-647    | MI0003662 | GUGGCUGCACUCACUCCUUC      |
| Plate 4 | B07 | C-300975-01 | hsa-miR-648    | MI0003663 | AAGUGUGCAGGGCACUGGU       |
| Plate 4 | B08 | C-300976-01 | hsa-miR-649    | MI0003664 | AAACCUGUGUUGUUCAAGAGUC    |
| Plate 4 | B09 | C-300977-01 | hsa-miR-650    | MI0003665 | AGGAGGCAGCGCUCUCAGGAC     |
| Plate 4 | B10 | C-300978-01 | hsa-miR-651    | MI0003666 | UUUAGGAUAAGCUUGACUUUUG    |
| Plate 4 | B11 | C-300980-01 | hsa-miR-548d   | MI0003668 | CAAAAACCACAGUUUCUUUUGC    |
| Plate 4 | C02 | C-300981-01 | hsa-miR-661    | MI0003669 | UGCCUGGGUCUCUGGCCUGCGCGU  |
| Plate 4 | C03 | C-300982-01 | hsa-miR-662    | MI0003670 | UCCCACGUUGUGGCCCCAGCAG    |
| Plate 4 | C04 | C-300983-01 | hsa-miR-548d   | MI0003671 | CAAAAACCACAGUUUCUUUUGC    |
| Plate 4 | C05 | C-300984-01 | hsa-miR-663    | MI0003672 | AGGCGGGGCGCCGCGGGACCGC    |
| Plate 4 | C06 | C-300985-01 | hsa-miR-449b   | MI0003673 | AGGCAGUGUAUUGUUAGCUGGC    |
| Plate 4 | C07 | C-300987-01 | hsa-miR-411    | MI0003675 | UAGUAGACCGUAUAGCGUACG     |
| Plate 4 | C08 | C-300988-01 | hsa-miR-654    | MI0003676 | UGGUGGGCCGCAGAACAUGUGC    |
| Plate 4 | C09 | C-300989-01 | hsa-miR-655    | MI0003677 | AUAAUACAUGGUUAACCUCUUU    |
| Plate 4 | C10 | C-300990-01 | hsa-miR-656    | MI0003678 | AAUAUUUAUACAGUCAACCUCU    |
| Plate 4 | C11 | C-300991-01 | hsa-miR-549    | MI0003679 | UGACAACUAUGGAUGAGCUCU     |
| Plate 4 | D02 | C-300992-01 | hsa-miR-657    | MI0003681 | GGCAGGUUCUCACCCUCUCUAGG   |
| Plate 4 | D03 | C-300993-01 | hsa-miR-658    | MI0003682 | GGCGGAGGGAAGUAGGUCCGUUGGU |
| Plate 4 | D04 | C-300994-01 | hsa-miR-659    | MI0003683 | CUUGGUUCAGGGAGGGUCCCA     |
| Plate 4 | D05 | C-300995-01 | hsa-miR-660    | MI0003684 | UACCCAUUGCAUAUCGGAGUUG    |
| Plate 4 | D06 | C-300996-01 | hsa-miR-421    | MI0003685 | AUCAACAGACAUUAAUUGGGCGC   |
| Plate 4 | D07 | C-300997-01 | hsa-miR-425-5p | MI0001448 | AAUGACACGAUCACUCCCGUUGA   |
| Plate 4 | D08 | C-300496-05 | hsa-miR-24     | MI0000080 | UGGCUCAGUUCAGCAGGAACAG    |
| Plate 4 | D09 | C-300573-05 | hsa-miR-218    | MI0000294 | UUGUGCUUGAUCUAACCAUGU     |
| Plate 4 | D10 | C-300490-05 | hsa-miR-19b    | MI0000075 | UGUGCAAUCCAUGCAAACUGA     |
| Plate 4 | D11 | C-300481-05 | hsa-let-7f     | MI0000068 | UGAGGUAGUAGAUUGUAUAGUU    |
| Plate 4 | E02 | C-300475-05 | hsa-let-7a     | MI0000062 | UGAGGUAGUAGGUUGUAUAGUU    |

|         |     |             |                |           |                         |
|---------|-----|-------------|----------------|-----------|-------------------------|
| Plate 4 | E03 | C-300473-05 | hsa-let-7a     | MI0000060 | UGAGGUAGUAGGUUGUAUAGUU  |
| Plate 4 | E04 | C-300576-05 | hsa-miR-219    | MI0000740 | UGAUUGUCCAAACGCAAUUCU   |
| Plate 4 | E05 | C-300727-05 | hsa-miR-200a*  | MI0000737 | CAUCUUACCGGACAGUGCUGGA  |
| Plate 4 | E06 | C-300651-05 | hsa-miR-200a   | MI0000737 | UAACACUGUCUGGUAACGAUGU  |
| Plate 4 | E07 | C-300515-05 | hsa-miR-98     | MI0000100 | UGAGGUAGUAAGUUGUAUUGUU  |
| Plate 4 | E08 | C-300587-05 | hsa-miR-15b    | MI0000438 | UAGCAGCACAUCAUGGUUUACA  |
| Plate 4 | E09 | C-300521-05 | hsa-miR-29b    | MI0000107 | UAGCACCAUUUGAAAUCAGUGUU |
| Plate 4 | E10 | C-300520-05 | hsa-miR-29b    | MI0000105 | UAGCACCAUUUGAAAUCAGUGUU |
| Plate 4 | E11 | C-300545-05 | hsa-miR-147    | MI0000262 | GUGUGUGGAAAUGCUCUCGC    |
| Plate 4 | F02 | C-300682-05 | hsa-miR-375    | MI0000783 | UUUGUUCGUUCGGCUCGCGUGA  |
| Plate 4 | F03 | C-300570-05 | hsa-miR-215    | MI0000291 | AUGACCUAUGAAUUGACAGAC   |
| Plate 4 | F04 | C-300589-05 | hsa-miR-27b    | MI0000440 | UUCACAGUGGCUAAGUUCUGC   |
| Plate 4 | F05 | C-300625-05 | hsa-miR-126*   | MI0000471 | CAUUAUUACUUUUGGUACGCG   |
| Plate 4 | F06 | C-300717-05 | hsa-miR-424    | MI0001446 | CAGCAGCAAUUCAUGUUUUGAA  |
| Plate 4 | F07 | C-300563-05 | hsa-miR-204    | MI0000284 | UUCUUUUGUCAUCCUAUGCCU   |
| Plate 4 | F08 | C-300564-05 | hsa-miR-205    | MI0000285 | UCCUUCAUJCCACCGGAGUCUG  |
| Plate 4 | F09 | C-300663-05 | hsa-miR-361    | MI0000760 | UUAUCAGAAUCUCCAGGGGUAC  |
| Plate 4 | F10 | C-300673-05 | hsa-miR-367    | MI0000775 | AAUUGCACUUUAGCAAUGGUGA  |
| Plate 4 | F11 | C-300662-05 | hsa-miR-30e-3p | MI0000749 | CUUUCAGUCGGAUGUUUACAGC  |
| Plate 4 | G02 | C-300681-05 | hsa-miR-374    | MI0000782 | UUAUAAUACAACCUGAUUAGUG  |
| Plate 4 | G03 | C-300708-05 | hsa-miR-335    | MI0000816 | UCAAGAGCAAUAACGAAAAAUGU |
| Plate 4 | G04 | C-300703-05 | hsa-miR-331    | MI0000812 | GCCCCUGGGCCUAUCCUAGAA   |
| Plate 4 | G05 | C-300618-05 | hsa-miR-9      | MI0000466 | UCUUUGGUUAUCUAGCUGUAUGA |
| Plate 4 | G06 | C-300578-05 | hsa-miR-221    | MI0000298 | AGCUACAUJGUCUGCUGGGUUUC |
| Plate 4 | G07 | C-300672-05 | hsa-miR-302d   | MI0000774 | UAAGUGCUUCCAUGUUUGAGUGU |
| Plate 4 | G08 | C-300671-05 | hsa-miR-302c   | MI0000773 | UAAGUGCUUCCAUGUUUCAGUGG |
| Plate 4 | G09 | C-300670-05 | hsa-miR-302c*  | MI0000773 | UUUAACAUGGGGGUACCUGCUG  |
| Plate 4 | G10 | C-300669-05 | hsa-miR-302b   | MI0000772 | UAAGUGCUUCCAUGUUUUAGUAG |
| Plate 4 | G11 | C-300653-05 | hsa-miR-302a   | MI0000738 | UAAGUGCUUCCAUGUUUUGGUGA |
| Plate 4 | H02 | C-300840-05 | hsa-miR-502    | MI0003186 | AUCCUUGCUAUCUGGGUGCUA   |
| Plate 4 | H03 | C-300841-05 | hsa-miR-503    | MI0003188 | UAGCAGCGGGAACAGUUCUGCAG |
| Plate 4 | H04 | C-300722-05 | hsa-miR-429    | MI0001641 | UAAUACUGUCUGGUAACCGU    |
| Plate 4 | H05 | C-300839-05 | hsa-miR-501    | MI0003185 | AAUCCUUUGUCCCUGGGUGAGA  |
| Plate 4 | H06 | C-300838-05 | hsa-miR-500    | MI0003184 | AUGCACCUGGGCAAGGAUUCUG  |
| Plate 4 | H07 | C-300847-05 | hsa-miR-507    | MI0003194 | UUUUGCACCUUUUGGAGUGAA   |
| Plate 4 | H08 | C-300846-05 | hsa-miR-506    | MI0003193 | UAAGGCACCCUUCUGAGUAGA   |
| Plate 4 | H09 | C-300588-05 | hsa-miR-23b    | MI0000439 | AUCACAUUGCCAGGGAUUACC   |
| Plate 4 | H10 | C-300848-05 | hsa-miR-508    | MI0003195 | UGAUUGUAGCCUUUUGGAGUAGA |
| Plate 4 | H11 | C-300856-05 | hsa-miR-455    | MI0003513 | UAUGUGCCUUUGGACUACAUCG  |
| Plate 5 | A02 | C-300720-05 | hsa-miR-20b    | MI0001519 | CAAAGUGCUCAUAGUGCAGGUAG |
| Plate 5 | A03 | C-300649-05 | hsa-miR-106b   | MI0000734 | UAAAGUGCUGACAGUGCAGAU   |
| Plate 5 | A04 | C-300561-05 | hsa-miR-199b   | MI0000282 | CCCAGUGUUUAGACUAUCUGUUC |
| Plate 5 | A05 | C-300484-05 | hsa-miR-16     | MI0000115 | UAGCAGCACGUAAAUAUUGGCG  |
| Plate 5 | A06 | C-300665-05 | hsa-miR-363    | MI0000764 | AAUUGCACGGUAUCCAUCUGUA  |
| Plate 5 | A07 | C-300864-03 | hsa-miR-363*   | MI0000764 | CGGGUGGAUCACGAUGCAAUUU  |
| Plate 5 | A08 | C-300710-05 | hsa-miR-325    | MI0000824 | CCUAGUAGGUGUCCAGUAAGUGU |
| Plate 5 | A09 | C-300531-05 | hsa-miR-197    | MI0000239 | UUCACCACCUUCUCCACCCAGC  |

|         |     |             |                |           |                             |
|---------|-----|-------------|----------------|-----------|-----------------------------|
| Plate 5 | A10 | C-300721-05 | hsa-miR-448    | MI0001637 | UUGCAUAUGUAGGAUGUCCCAU      |
| Plate 5 | A11 | C-300498-05 | hsa-miR-25     | MI0000082 | CAUUGCACUUGUCUCGGUCUGA      |
| Plate 5 | B02 | C-300866-03 | hsa-miR-542-3p | MI0003686 | UGUGACAGAUUGAUACUGAAA       |
| Plate 5 | B03 | C-300503-05 | hsa-miR-28     | MI0000086 | AAGGAGCUCACAGUCUAUUGAG      |
| Plate 5 | B04 | C-300757-05 | hsa-miR-492    | MI0003131 | AGGACCUGCGGGACAAGAUUCUU     |
| Plate 5 | B05 | C-300750-05 | hsa-miR-490    | MI0003125 | CAACCUUGGAGGACUCCAUGCUG     |
| Plate 5 | B06 | C-300748-05 | hsa-miR-488    | MI0003123 | CCCAGAUAAUGGCACUCUCA        |
| Plate 5 | B07 | C-300558-05 | hsa-miR-182*   | MI0000272 | UGGUUCUAGACUUGCCAACUA       |
| Plate 5 | B08 | C-300664-05 | hsa-miR-362    | MI0000762 | AAUCCUUGGAACCUAGGUGUGAGU    |
| Plate 5 | B09 | C-300603-05 | hsa-miR-135a   | MI0000453 | UAUGGCUUUUUUUAUCCUAUGUGA    |
| Plate 5 | B10 | C-300713-05 | hsa-miR-384    | MI0001145 | AUUCUAGAAAUUGUUCAUA         |
| Plate 5 | B11 | C-300660-05 | hsa-miR-130b   | MI0000748 | CAGUGCAAUGAUGAAAGGGCAU      |
| Plate 5 | C02 | C-300476-05 | hsa-let-7b     | MI0000063 | UGAGGUAGUAGGUUGUGUGGUU      |
| Plate 5 | C03 | C-300542-05 | hsa-miR-30c    | MI0000736 | UGUAAACAUCCUACACUCUCAGC     |
| Plate 5 | C04 | C-300641-05 | hsa-miR-194    | MI0000488 | UGUAAACAGCAACUCCAUGUGGA     |
| Plate 5 | C05 | C-300538-05 | hsa-miR-129    | MI0000252 | CUUUUUGCGGUCUGGGCUUGC       |
| Plate 5 | C06 | C-300534-05 | hsa-miR-199a   | MI0000281 | CCCAGUGUUCAGACUACCUGUUC     |
| Plate 5 | C07 | C-300552-05 | hsa-miR-181a   | MI0000269 | AACAUUCAACGCUGUCGGUGAGU     |
| Plate 5 | C08 | C-300553-05 | hsa-miR-181a   | MI0000289 | AACAUUCAACGCUGUCGGUGAGU     |
| Plate 5 | C09 | C-300568-05 | hsa-miR-213    | MI0000289 | ACCAUCGACCGUUGAUUGUACC      |
| Plate 5 | C10 | C-300480-05 | hsa-let-7f     | MI0000067 | UGAGGUAGUAGAUUGUAUAGUU      |
| Plate 5 | C11 | C-300540-05 | hsa-miR-148a   | MI0000253 | UCAGUGCACUACAGAACUUUGU      |
| Plate 5 | D02 | C-300513-05 | hsa-miR-95     | MI0000097 | UUCAACGGGUUUUAUUGAGCA       |
| Plate 5 | D03 | C-300577-05 | hsa-miR-220    | MI0000297 | CCACACCGUAUCUGACACUUU       |
| Plate 5 | D04 | C-300575-05 | hsa-miR-219    | MI0000296 | UGAUUGUCCAAACGCAAUUCU       |
| Plate 5 | D05 | C-300999-01 | hsa-miR-758    | MI0003757 | UUUGUGACCUUGUCCACUAACC      |
| Plate 5 | D06 | C-301001-01 | hsa-miR-668    | MI0003761 | UGUCACUCGGCUCGGCCCACUAC     |
| Plate 5 | D07 | C-301002-01 | hsa-miR-767-5p | MI0003763 | UGCACCAUGGUUGUCUGAGCAUG     |
| Plate 5 | D08 | C-301003-01 | hsa-miR-767-3p | MI0003763 | UCUGCUCAUACCCCAUGGUUUCU     |
| Plate 5 | D09 | C-301005-01 | hsa-miR-454-5p | MI0003820 | ACCCUAUCAAUUAUUGUCUCUGC     |
| Plate 5 | D10 | C-301006-01 | hsa-miR-769-3p | MI0003834 | CUGGGAUUCUCCGGGGUCUUGGUU    |
| Plate 5 | D11 | C-301007-01 | hsa-miR-769-5p | MI0003834 | UGAGACCUCUGGGUUCUGAGCU      |
| Plate 5 | E02 | C-301008-01 | hsa-miR-766    | MI0003836 | ACUCCAGCCCCACAGCCUCAGC      |
| Plate 5 | E03 | C-301009-01 | hsa-miR-802    | MI0003906 | CAGUAACAAAGAUUCAUCCUUGU     |
| Plate 5 | E04 | C-301010-01 | hsa-miR-765    | MI0005116 | UGGAGGAGAAGGAAGGUGAUG       |
| Plate 5 | E05 | C-301011-01 | hsa-miR-768-3p | MI0005117 | UCACAAUGCUGACACUCAACUGCUGAC |
| Plate 5 | E06 | C-301012-01 | hsa-miR-768-5p | MI0005117 | GUUGGAGGAUGAAAGUACGGAGUGAU  |
| Plate 5 | E07 | C-301013-01 | hsa-miR-770-5p | MI0005118 | UCCAGUACCACGUGUCAGGGCCA     |
| Plate 5 | E08 | C-301014-01 | hsa-miR-801    | MI0005202 | GAUUGCUCUGCGUGCGGAAUCGAC    |
| Plate 5 | E09 | C-300479-05 | hsa-let-7e     | MI0000066 | UGAGGUAGGAGGUUGUAUAGUU      |
| Plate 5 | E10 | C-300485-05 | hsa-miR-17-5p  | MI0000071 | CAAAGUGCUUACAGUGCAGGUAG     |
| Plate 5 | E11 | C-300486-05 | hsa-miR-17-3p  | MI0000071 | ACUGCAGUGAAGGCACUUGUAG      |
| Plate 5 | F02 | C-300487-05 | hsa-miR-18a    | MI0000072 | UAAGGUGCAUCUAGUGCAGAUAG     |
| Plate 5 | F03 | C-300499-05 | hsa-miR-26a    | MI0000083 | UUCAAGUAAUCCAGGAUAGGCU      |
| Plate 5 | F04 | C-300507-05 | hsa-miR-31     | MI0000089 | AGGCAAGAUGCUGGCAUAGCU       |
| Plate 5 | F05 | C-300510-05 | hsa-miR-92     | MI0000093 | UAUUGCACUUGUCCCGGCCUGU      |
| Plate 5 | F06 | C-300529-05 | hsa-miR-196a   | MI0000238 | UAGGUAGUUUCAUGUUGUUGGG      |
| Plate 5 | F07 | C-300532-05 | hsa-miR-198    | MI0000240 | GGUCCAGAGGGGAGAUAGGUUC      |

|         |     |             |                 |           |                         |
|---------|-----|-------------|-----------------|-----------|-------------------------|
| Plate 5 | F08 | C-300535-05 | hsa-miR-199a*   | MI0000242 | ACAGUAGUCUGCACAUUGGUUA  |
| Plate 5 | F09 | C-300544-05 | hsa-miR-139     | MI0000261 | UCUACAGUGCACGUGUCUCCAG  |
| Plate 5 | F10 | C-300547-05 | hsa-miR-7       | MI0000264 | UGGAAGACUAGUGAUUUUGUUGU |
| Plate 5 | F11 | C-300548-05 | hsa-miR-7       | MI0000265 | UGGAAGACUAGUGAUUUUGUUGU |
| Plate 5 | G02 | C-300855-05 | hsa-miR-18a*    | MI0000072 | ACUGCCCUAAGUGCUCUUCUGG  |
| Plate 5 | G03 | C-301039-01 | hsa-miR-181c*   | MI0000271 | AACCAUCGACCGUUGAGUGGAC  |
| Plate 5 | G04 | C-301040-01 | hsa-miR-187*    | MI0000274 | GGCUACAACACAGGACCCGGGC  |
| Plate 5 | G05 | C-301041-01 | hsa-miR-196a*   | MI0000279 | CGGCAACAAGAAACUGCCUGAG  |
| Plate 5 | G06 | C-301042-01 | hsa-miR-218-2*  | MI0000295 | CAUGGUUCUGUCAAGCACCGCG  |
| Plate 5 | G07 | C-301043-01 | hsa-let-7g*     | MI0000433 | CUGUACAGGCCACUGCCUUGC   |
| Plate 5 | G08 | C-301044-01 | hsa-let-7i*     | MI0000434 | CUGCGCAAGCUACUGCCUUGC   |
| Plate 5 | G09 | C-301045-01 | hsa-miR-30b*    | MI0000441 | CUGGGAGGUGGAUGUUUACUUC  |
| Plate 5 | G10 | C-301046-01 | hsa-miR-122*    | MI0000442 | AACGCCAUUAUCACACUAAAUA  |
| Plate 5 | G11 | C-301047-01 | hsa-miR-124*    | MI0000443 | CGUGUUCACAGCGGACCUUGAU  |
| Plate 5 | H02 | C-301049-01 | hsa-miR-124*    | MI0000445 | CGUGUUCACAGCGGACCUUGAU  |
| Plate 5 | H03 | C-301050-01 | hsa-miR-125b-1* | MI0000446 | ACGGGUUAGGCUCUUGGGAGCU  |
| Plate 5 | H04 | C-301051-01 | hsa-miR-130a*   | MI0000448 | UUCACAUUGUGCUACUGUCUGC  |
| Plate 5 | H05 | C-301052-01 | hsa-miR-132*    | MI0000449 | ACCGUGGCUUUCGAUUGUUACU  |
| Plate 5 | H06 | C-301053-01 | hsa-miR-135a*   | MI0000452 | UAUAGGGAUUGGAGCCGUGGCG  |
| Plate 5 | H07 | C-301054-01 | hsa-miR-138-2*  | MI0000455 | GCUAUUUCACGACACCAGGGUU  |
| Plate 5 | H08 | C-301055-01 | hsa-miR-140-3p  | MI0000456 | UACCACAGGGUAGAACCACGG   |
| Plate 5 | H09 | C-301056-01 | hsa-miR-141*    | MI0000457 | CAUCUCCAGUACAGUGUUGGA   |
| Plate 5 | H10 | C-301057-01 | hsa-miR-143*    | MI0000459 | GGUGCAGUGCUGCAUCUCUGGU  |
| Plate 5 | H11 | C-301058-01 | hsa-miR-144*    | MI0000460 | GGAUAUCAUCAUAUACUGUAAG  |
| Plate 6 | A02 | C-301059-01 | hsa-miR-145*    | MI0000461 | GGAUUCCUGGAAAUACUGUUCU  |
| Plate 6 | A03 | C-301048-01 | hsa-miR-124*    | MI0000444 | CGUGUUCACAGCGGACCUUGAU  |
| Plate 6 | A04 | C-301060-01 | hsa-miR-125a-3p | MI0000469 | ACAGGUGAGGUUCUUGGGAGCC  |
| Plate 6 | A05 | C-301061-01 | hsa-miR-125b-2* | MI0000470 | UCACAAGUCAGGCUCUUGGGAC  |
| Plate 6 | A06 | C-301062-01 | hsa-miR-127-5p  | MI0000472 | CUGAAGCUCAGAGGGCUCUGAU  |
| Plate 6 | A07 | C-301063-01 | hsa-miR-129-3p  | MI0000473 | AAGCCCUUACCCCAAAAAGCAU  |
| Plate 6 | A08 | C-301065-01 | hsa-miR-138-1*  | MI0000476 | GCUACUUCACAACACCAGGGCC  |
| Plate 6 | A09 | C-301066-01 | hsa-miR-146a*   | MI0000477 | CCUCUGAAAUUCAGUUCUUCAG  |
| Plate 6 | A10 | C-301067-01 | hsa-miR-150*    | MI0000479 | CUGGUACAGGCCUGGGGGACAG  |
| Plate 6 | A11 | C-301068-01 | hsa-miR-193a-5p | MI0000487 | UGGGUCUUUGCGGGCGAGAUGA  |
| Plate 6 | B02 | C-301069-01 | hsa-miR-195*    | MI0000489 | CCAAUAUUGGCUGUGCUGCUCC  |
| Plate 6 | B03 | C-301064-01 | hsa-miR-136*    | MI0000475 | CAUCAUCGUCUCAAAUGAGUCU  |
| Plate 6 | B04 | C-301070-01 | hsa-miR-200c*   | MI0000650 | CGUCUUACCCAGCAGUGUUUGG  |
| Plate 6 | B05 | C-301073-01 | hsa-miR-34b     | MI0000742 | CAAUCACUAACUCCACUGCCAU  |
| Plate 6 | B06 | C-301074-01 | hsa-miR-34c-3p  | MI0000743 | AAUCACUAACCACACGGCCAGG  |
| Plate 6 | B07 | C-301075-01 | hsa-miR-99b*    | MI0000746 | CAAGCUCGUGUCUGUGGGUCCG  |
| Plate 6 | B08 | C-301076-01 | hsa-miR-296-3p  | MI0000747 | GAGGGUUGGGUGGAGGCUCUCC  |
| Plate 6 | B09 | C-301077-01 | hsa-miR-26a-2*  | MI0000750 | CCUAUUCUUGAUUACUUGUUUC  |
| Plate 6 | B10 | C-301071-01 | hsa-miR-155*    | MI0000681 | CUCCUACAUUUAGCAUUAACA   |
| Plate 6 | B11 | C-301072-01 | hsa-miR-128     | MI0000727 | UCACAGUGAACC GGUCUCUUU  |
| Plate 6 | C02 | C-301078-01 | hsa-miR-371-5p  | MI0000779 | ACUCAAACUGUGGGGGCACU    |
| Plate 6 | C03 | C-301079-01 | hsa-miR-377*    | MI0000785 | AGAGGUUGCCCUUGGUGAAUUC  |
| Plate 6 | C04 | C-301080-01 | hsa-miR-379*    | MI0000787 | UAUGUAACAUGGUCCACUAACU  |

|         |     |             |                 |           |                         |
|---------|-----|-------------|-----------------|-----------|-------------------------|
| Plate 6 | C05 | C-301081-01 | hsa-miR-340     | MI0000802 | UUUAUAAAGCAAUGAGACUGAUU |
| Plate 6 | C06 | C-301082-01 | hsa-miR-330-5p  | MI0000803 | UCUCUGGGCCUGUGUCUUAGGC  |
| Plate 6 | C07 | C-301083-01 | hsa-miR-342-5p  | MI0000805 | AGGGGUGCUAUCUGUGAUUGA   |
| Plate 6 | C08 | C-301084-01 | hsa-miR-337-5p  | MI0000806 | GAACGGCUUCAUACAGGAGUU   |
| Plate 6 | C09 | C-301085-01 | hsa-miR-323-5p  | MI0000807 | AGGUGGUCCGUGGCGGUUCGC   |
| Plate 6 | C10 | C-301086-01 | hsa-miR-151-5p  | MI0000809 | UCGAGGAGCUCACAGUCUAGU   |
| Plate 6 | C11 | C-301087-01 | hsa-miR-148b*   | MI0000811 | AAGUUCUGUUUAUACACUCAGGC |
| Plate 6 | D02 | C-301088-01 | hsa-miR-338-5p  | MI0000814 | AACAAUAUCCUGGUGCUGAGUG  |
| Plate 6 | D03 | C-301089-01 | hsa-miR-423-5p  | MI0001445 | UGAGGGGCAGAGAGCGAGACUUU |
| Plate 6 | D04 | C-301090-01 | hsa-miR-431*    | MI0001721 | CAGGUCGUCUUGCAGGGCUUCU  |
| Plate 6 | D05 | C-301093-01 | hsa-miR-193b*   | MI0003137 | CGGGGUUUUGAGGGCGAGAUGA  |
| Plate 6 | D06 | C-301094-01 | hsa-miR-497*    | MI0003138 | CAAACCACACUGUGGUGUUAGA  |
| Plate 6 | D07 | C-301091-01 | hsa-miR-491-3p  | MI0003126 | CUUAUGCAAGAUUCCCUUCUAC  |
| Plate 6 | D08 | C-301092-01 | hsa-miR-146b-3p | MI0003129 | UGCCUGUGGACUCAGUUCUGG   |
| Plate 6 | D09 | C-301095-01 | hsa-miR-519b-5p | MI0003151 | CUCUAGAGGGAAGCGCUUUCUG  |
| Plate 6 | D10 | C-301096-01 | hsa-miR-523*    | MI0003153 | CUCUAGAGGGAAGCGCUUUCUG  |
| Plate 6 | D11 | C-301097-01 | hsa-miR-520c-5p | MI0003158 | CUCUAGAGGGAAGCACUUUCUG  |
| Plate 6 | E02 | C-301098-01 | hsa-miR-518e*   | MI0003169 | CUCUAGAGGGAAGCGCUUUCUG  |
| Plate 6 | E03 | C-301099-01 | hsa-miR-518a-5p | MI0003170 | CUGCAAAGGGAAGCCCUUUC    |
| Plate 6 | E04 | C-301100-01 | hsa-miR-518d-5p | MI0003171 | CUCUAGAGGGAAGCACUUUCUG  |
| Plate 6 | E05 | C-301101-01 | hsa-miR-518a-5p | MI0003173 | CUGCAAAGGGAAGCCCUUUC    |
| Plate 6 | E06 | C-301104-01 | hsa-miR-516a-5p | MI0003180 | UUCUCGAGGAAAGAAGCACUUUC |
| Plate 6 | E07 | C-301105-01 | hsa-miR-516a-5p | MI0003181 | UUCUCGAGGAAAGAAGCACUUUC |
| Plate 6 | E08 | C-301102-01 | hsa-miR-522*    | MI0003177 | CUCUAGAGGGAAGCGCUUUCUG  |
| Plate 6 | E09 | C-301103-01 | hsa-miR-519a*   | MI0003178 | CUCUAGAGGGAAGCGCUUUCUG  |
| Plate 6 | E10 | C-301106-01 | hsa-miR-499-3p  | MI0003183 | AAAUACACAGCAAGUCUGUGCU  |
| Plate 6 | E11 | C-301108-01 | hsa-miR-194*    | MI0000732 | CCAGUGGGGCGUCUGUUAUCUG  |
| Plate 6 | F02 | C-301107-01 | hsa-miR-483-5p  | MI0002467 | AAGACGGGAGGAAAGAAGGGAG  |
| Plate 6 | F03 | C-301109-01 | hsa-miR-532-3p  | MI0003205 | CCUCCCACACCCAAGGCUUGCA  |
| Plate 6 | F04 | C-301111-01 | hsa-miR-556-3p  | MI0003562 | AUAUUACCAUUAGCUCAUCUUU  |
| Plate 6 | F05 | C-301112-01 | hsa-miR-551b*   | MI0003575 | GAAAUCAAGCGUGGGUGAGACC  |
| Plate 6 | F06 | C-301110-01 | hsa-miR-92b*    | MI0003560 | AGGGACGGGACGCGGUGCAGUG  |
| Plate 6 | F07 | C-301113-01 | hsa-miR-574-5p  | MI0003581 | UGAGUGUGUGUGUGUGAGUGUGU |
| Plate 6 | F08 | C-301115-01 | hsa-miR-582-3p  | MI0003589 | UACUGGUUGAACAAACUGAACC  |
| Plate 6 | F09 | C-301116-01 | hsa-miR-548b-5p | MI0003596 | AAAAGUAAUUGUGUUUUGGCC   |
| Plate 6 | F10 | C-301117-01 | hsa-miR-589     | MI0003599 | UGAGAACCACGUCUGCUCUGAG  |
| Plate 6 | F11 | C-301118-01 | hsa-miR-550     | MI0003600 | AGUGCCUGAGGGAGUAAGAGCCC |
| Plate 6 | G02 | C-301119-01 | hsa-miR-550     | MI0003601 | AGUGCCUGAGGGAGUAAGAGCCC |
| Plate 6 | G03 | C-301120-01 | hsa-miR-590-3p  | MI0003602 | UAAUUUUUAUGUAUAAGCUAGU  |
| Plate 6 | G04 | C-301121-01 | hsa-miR-593     | MI0003605 | UGUCUCUGCUGGGGUUUCU     |
| Plate 6 | G05 | C-301122-01 | hsa-miR-548a-5p | MI0003612 | AAAAGUAAUUGCGAGUUUUACC  |
| Plate 6 | G06 | C-301123-01 | hsa-miR-615-5p  | MI0003628 | GGGGGUCCCCGGUGCUCGGAUC  |
| Plate 6 | G07 | C-301124-01 | hsa-miR-616     | MI0003629 | AGUCAUUGGAGGGUUUGAGCAG  |
| Plate 6 | G08 | C-301125-01 | hsa-miR-548c-5p | MI0003630 | AAAAGUAAUUGCGUUUUUGCC   |
| Plate 6 | G09 | C-301126-01 | hsa-miR-624     | MI0003638 | CACAAGGUUUUGUAUUACCU    |
| Plate 6 | G10 | C-301127-01 | hsa-miR-625*    | MI0003639 | GACUAUAGAACUUUCCCCCUCA  |
| Plate 6 | G11 | C-301114-01 | hsa-miR-576-3p  | MI0003583 | AAGAUGUGGAAAAAUUGGAAUC  |
| Plate 6 | H02 | C-301128-01 | hsa-miR-628-5p  | MI0003642 | AUGCUGACAUUUUACUAGAGG   |

|         |     |             |                  |           |                          |
|---------|-----|-------------|------------------|-----------|--------------------------|
| Plate 6 | H03 | C-301129-01 | hsa-miR-629      | MI0003643 | UGGGUUUACGUUGGGAGAACU    |
| Plate 6 | H04 | C-301130-01 | hsa-miR-33b*     | MI0003646 | CAGUGCCUCGGCAGUGCAGCCC   |
| Plate 6 | H05 | C-301131-01 | hsa-miR-548d-5p  | MI0003668 | AAAAGUAAUUGUGUUUUUGCC    |
| Plate 6 | H06 | C-301132-01 | hsa-miR-548d-5p  | MI0003671 | AAAAGUAAUUGUGUUUUUGCC    |
| Plate 6 | H07 | C-301133-01 | hsa-miR-411*     | MI0003675 | UAUGUAACACGGUCCACUAACC   |
| Plate 6 | H08 | C-301134-01 | hsa-miR-654-3p   | MI0003676 | UAUGUCUGCUGACCAUCACCUU   |
| Plate 6 | H09 | C-301138-01 | hsa-miR-218-1*   | MI0000294 | AUGGUUCCGUCAAGCACCAUGG   |
| Plate 6 | H10 | C-301139-01 | hsa-miR-19b-2*   | MI0000075 | AGUUUUGCAGGUUUGCAUUUCA   |
| Plate 6 | H11 | C-301140-01 | hsa-let-7f-2*    | MI0000068 | CUAUACAGUCUACUGUCUUUC    |
| Plate 7 | A02 | C-301141-01 | hsa-let-7a*      | MI0000062 | CUAUACAAUCUACUGUCUUUC    |
| Plate 7 | A03 | C-301142-01 | hsa-let-7a*      | MI0000060 | CUAUACAAUCUACUGUCUUUC    |
| Plate 7 | A04 | C-301143-01 | hsa-miR-219-2-3p | MI0000740 | AGAAUUGUGGCUGGACAUCUGU   |
| Plate 7 | A05 | C-301135-01 | hsa-miR-101*     | MI0000103 | CAGUUAUCACAGUGCUGAUGCU   |
| Plate 7 | A06 | C-301136-01 | hsa-miR-33a*     | MI0000091 | CAAUGUUUCCACAGUGCAUCAC   |
| Plate 7 | A07 | C-301137-01 | hsa-miR-92a-2*   | MI0000094 | GGGUGGGGAUUUGUUGCAUUAC   |
| Plate 7 | A08 | C-301145-01 | hsa-miR-34a*     | MI0000268 | CAAUCAGCAAGUAUACUGCCCU   |
| Plate 7 | A09 | C-301146-01 | hsa-miR-15b*     | MI0000438 | CGAAUCAUUUUUGCUGCUCUA    |
| Plate 7 | A10 | C-301147-01 | hsa-miR-513a-3p  | MI0003191 | UAAAUUUCACCUUUCUGAGAAGG  |
| Plate 7 | A11 | C-301144-01 | hsa-miR-200b*    | MI0000342 | CAUCUUACUGGGCAGCAUUGGA   |
| Plate 7 | B02 | C-301148-01 | hsa-miR-513a-3p  | MI0003192 | UAAAUUUCACCUUUCUGAGAAGG  |
| Plate 7 | B03 | C-301149-01 | hsa-miR-29b-2*   | MI0000107 | CUGGUUUCACAUGGUGGCUUAG   |
| Plate 7 | B04 | C-301150-01 | hsa-miR-29b-1*   | MI0000105 | GCUGGUUUCAUAUGGUGGUUUAGA |
| Plate 7 | B05 | C-301151-01 | hsa-miR-149*     | MI0000478 | AGGGAGGGACGGGGCUGUGC     |
| Plate 7 | B06 | C-301152-01 | hsa-miR-7-1*     | MI0000263 | CAACAAUCACAGUCUGCCAUA    |
| Plate 7 | B07 | C-301153-01 | hsa-miR-214*     | MI0000290 | UGCCUGUCUACACUUGCUGUGC   |
| Plate 7 | B08 | C-301155-01 | hsa-miR-424*     | MI0001446 | CAAACGUGAGGCGCUGCUAU     |
| Plate 7 | B09 | C-301156-01 | hsa-miR-26b*     | MI0000084 | CCUGUUCUCCAUAUUCUUGGCUC  |
| Plate 7 | B10 | C-301157-01 | hsa-miR-361-3p   | MI0000760 | UCCCCAGGUGUGAUUCUGAUUU   |
| Plate 7 | B11 | C-301158-01 | hsa-miR-367*     | MI0000775 | ACUGUUGCUAUAUUGCAACUCU   |
| Plate 7 | C02 | C-301154-01 | hsa-miR-27b*     | MI0000440 | AGAGCUUAGCUGAUUGGUGAAC   |
| Plate 7 | C03 | C-301159-01 | hsa-miR-106a*    | MI0000113 | CUGCAAUGUAAGCACUUCUAC    |
| Plate 7 | C04 | C-301160-01 | hsa-miR-374a*    | MI0000782 | CUUAUCAGAUUGUAUUGUAAUU   |
| Plate 7 | C05 | C-301161-01 | hsa-miR-335*     | MI0000816 | UUUUUCAUUUUGCUCCUGACC    |
| Plate 7 | C06 | C-301162-01 | hsa-miR-331-5p   | MI0000812 | CUAGGUUUGGUCCCAGGGAUCC   |
| Plate 7 | C07 | C-301163-01 | hsa-miR-221*     | MI0000298 | ACCUGGCAUACAAUGUAGAUUU   |
| Plate 7 | C08 | C-301164-01 | hsa-miR-302d*    | MI0000774 | ACUUUAACAUGGAGGCACUUGC   |
| Plate 7 | C09 | C-301165-01 | hsa-miR-502-3p   | MI0003186 | AAUGCACCUGGGCAAGGAUUCA   |
| Plate 7 | C10 | C-301166-01 | hsa-miR-509-5p   | MI0003196 | UACUGCAGACAGUGGCAAUCA    |
| Plate 7 | C11 | C-301167-01 | hsa-miR-501-3p   | MI0003185 | AAUGCACCCGGGCAAGGAUUCU   |
| Plate 7 | D02 | C-301168-01 | hsa-miR-500      | MI0003184 | UAAUCCUUGCACUCCUGGGUGAGA |
| Plate 7 | D03 | C-301170-01 | hsa-miR-23b*     | MI0000439 | UGGGUUCUGGCAUGCUGAUUU    |
| Plate 7 | D04 | C-301171-01 | hsa-miR-508-5p   | MI0003195 | UACUCCAGAGGGCGUCACUCAUG  |
| Plate 7 | D05 | C-301172-01 | hsa-miR-455-3p   | MI0003513 | GCAGUCCAUGGGCAUAUACAC    |
| Plate 7 | D06 | C-301173-01 | hsa-miR-10b*     | MI0000267 | ACAGAUUCGAUUCUAGGGGAAU   |
| Plate 7 | D07 | C-301174-01 | hsa-miR-20b*     | MI0001519 | ACUGUAGUAUGGGCACUCCAG    |
| Plate 7 | D08 | C-301175-01 | hsa-miR-106b*    | MI0000734 | CCGCACUGUGGGUACUUGCUGC   |
| Plate 7 | D09 | C-301176-01 | hsa-miR-222*     | MI0000299 | CUCAGUAGCCAGUGUAGAUCU    |

|         |     |             |                 |           |                         |
|---------|-----|-------------|-----------------|-----------|-------------------------|
| Plate 7 | D10 | C-301177-01 | hsa-miR-199b-3p | MI0000282 | ACAGUAGUCUGCACAUUGGUUA  |
| Plate 7 | D11 | C-301178-01 | hsa-miR-29a*    | MI0000087 | ACUGAUUUUUUGGUGUUCAG    |
| Plate 7 | E02 | C-301179-01 | hsa-miR-29c*    | MI0000735 | UGACCGAUUUCUCCUGGUGUUC  |
| Plate 7 | E03 | C-301180-01 | hsa-miR-16-2*   | MI0000115 | CCAAUUAUUACUGUGCUGCUUUA |
| Plate 7 | E04 | C-301181-01 | hsa-miR-32*     | MI0000090 | CAAUUUAGUGUGUGUGAUUUU   |
| Plate 7 | E05 | C-301169-01 | hsa-miR-505*    | MI0003190 | GGGAGCCAGGAAGUAUUGAUGU  |
| Plate 7 | E06 | C-301182-01 | hsa-miR-545*    | MI0003516 | UCAGUAAAUGUUUAAUAGAUGA  |
| Plate 7 | E07 | C-301183-01 | hsa-miR-25*     | MI0000082 | AGGCGGAGACUUGGGCAAUUG   |
| Plate 7 | E08 | C-301184-01 | hsa-miR-28-3p   | MI0000086 | CACUAGAUUGUGAGCUCCUGGA  |
| Plate 7 | E09 | C-301185-01 | hsa-miR-339-3p  | MI0000815 | UGAGCGCCUCGACGACAGAGCCG |
| Plate 7 | E10 | C-301186-01 | hsa-miR-490-5p  | MI0003125 | CCAUGGAUCUCCAGGUGGGU    |
| Plate 7 | E11 | C-301187-01 | hsa-miR-18b*    | MI0001518 | UGCCCUAAAUGCCCUUCUGGC   |
| Plate 7 | F02 | C-301188-01 | hsa-let-7d*     | MI0000065 | CUAUACGACCUGCUGCCUUUCU  |
| Plate 7 | F03 | C-301189-01 | hsa-miR-488     | MI0003123 | UUGAAAGGCUAUUUCUUGGUC   |
| Plate 7 | F04 | C-301190-01 | hsa-miR-188-3p  | MI0000484 | CUCCCACAUGCAGGGUUUGCA   |
| Plate 7 | F05 | C-301191-01 | hsa-miR-186*    | MI0000483 | GCCCAAAGGUGAAUUUUUUGGG  |
| Plate 7 | F06 | C-301192-01 | hsa-miR-185*    | MI0000482 | AGGGGCUGGCUUUCCUCUGGUC  |
| Plate 7 | F07 | C-301193-01 | hsa-miR-183*    | MI0000273 | GUGAAUUACCGAAGGGCCAUA   |
| Plate 7 | F08 | C-301194-01 | hsa-miR-362-3p  | MI0000762 | AACACACCUAUUCAAGGAUUA   |
| Plate 7 | F09 | C-301195-01 | hsa-miR-105*    | MI0000111 | ACGGAUGUUUGAGCAUGUGCUA  |
| Plate 7 | F10 | C-301196-01 | hsa-miR-130b*   | MI0000748 | ACUCUUUCCUGUUGCACUAC    |
| Plate 7 | F11 | C-301197-01 | hsa-miR-223*    | MI0000300 | CGUGUAUUUGACAAGCUGAGUU  |
| Plate 7 | G02 | C-301198-01 | hsa-let-7b*     | MI0000063 | CUAUACAACCUACUGCCUCCC   |
| Plate 7 | G03 | C-301199-01 | hsa-miR-30c-1*  | MI0000736 | CUGGGAGAGGGUUGUUUACUCC  |
| Plate 7 | G04 | C-301200-01 | hsa-miR-135b*   | MI0000810 | AUGUAGGGCUAAAAGCCAUGGG  |
| Plate 7 | G05 | C-301201-01 | hsa-miR-129*    | MI0000252 | AAGCCCUUACCCCAAAAAGUAU  |
| Plate 7 | G06 | C-301202-01 | hsa-miR-181a-2* | MI0000269 | ACCACUGACCGUUGACUGUACC  |
| Plate 7 | G07 | C-301203-01 | hsa-miR-105*    | MI0000112 | ACGGAUGUUUGAGCAUGUGCUA  |
| Plate 7 | G08 | C-301205-01 | hsa-miR-148a*   | MI0000253 | AAAGUUCUGAGACACUCCGACU  |
| Plate 7 | G09 | C-301206-01 | hsa-miR-96*     | MI0000098 | AAUCAUGUGCAGUGCCAAUAUG  |
| Plate 7 | G10 | C-301015-03 | hsa-miR-675     | MI0005416 | UGGUGCGGAGAGGGCCCACAGUG |
| Plate 7 | G11 | C-301210-01 | hsa-miR-297     | MI0005775 | AUGUAUGUGUGCAUGUGCAUG   |
| Plate 7 | H02 | C-301211-01 | hsa-miR-486-3p  | MI0002470 | CGGGGCAGCUCAGUACAGGAU   |
| Plate 7 | H03 | C-301212-01 | hsa-miR-298     | MI0005523 | AGCAGAAGCAGGGAGGUUCUCCA |
| Plate 7 | H04 | C-301213-01 | hsa-miR-891a    | MI0005524 | UGCAACGAACCUAGGCCACUGA  |
| Plate 7 | H05 | C-301214-01 | hsa-miR-300     | MI0005525 | UAUACAAGGGCAGACUCUCUCU  |
| Plate 7 | H06 | C-301215-01 | hsa-miR-886-3p  | MI0005527 | CGCGGGUGCUUACUGACCCUU   |
| Plate 7 | H07 | C-301216-01 | hsa-miR-886-5p  | MI0005527 | CGGGUCGGAGUUAGCUCAAGCGG |
| Plate 7 | H08 | C-301217-01 | hsa-miR-892a    | MI0005528 | CACUGUGUCCUUUCUGCGUAG   |
| Plate 7 | H09 | C-301218-01 | hsa-miR-220b    | MI0005529 | CCACCACCGUGUCUGACACUU   |
| Plate 7 | H10 | C-301219-01 | hsa-miR-509-5p  | MI0005530 | UACUGCAGACAGUGGCAAUCA   |
| Plate 7 | H11 | C-301220-01 | hsa-miR-509-3p  | MI0005530 | UGAUUGGUACGUCUGUGGUAG   |
| Plate 8 | A02 | C-301221-01 | hsa-miR-450b-5p | MI0005531 | UUUUGCAAUAUGUUCUGAAUA   |
| Plate 8 | A03 | C-301222-01 | hsa-miR-450b-3p | MI0005531 | UUGGGAUCAUUUUGCAUCCAUA  |
| Plate 8 | A04 | C-301223-01 | hsa-miR-874     | MI0005532 | CUGCCCUGGCCCGAGGGACCGA  |
| Plate 8 | A05 | C-301224-01 | hsa-miR-890     | MI0005533 | UACUUGGAAAGGCAUCAGUUG   |
| Plate 8 | A06 | C-301225-01 | hsa-miR-891b    | MI0005534 | UGCAACUJACCUGAGUCAUUGA  |

|         |     |             |                  |           |                           |
|---------|-----|-------------|------------------|-----------|---------------------------|
| Plate 8 | A07 | C-301226-01 | hsa-miR-220c     | MI0005536 | ACACAGGGCUGUUGUGAAGACU    |
| Plate 8 | A08 | C-301227-01 | hsa-miR-888*     | MI0005537 | GACUGACACCUCUUUGGGUGAA    |
| Plate 8 | A09 | C-301228-01 | hsa-miR-888      | MI0005537 | UACUCAAAAAGCUGUCAGUCA     |
| Plate 8 | A10 | C-301229-01 | hsa-miR-892b     | MI0005538 | CACUGGCUCCUUUCUGGGUAGA    |
| Plate 8 | A11 | C-301230-01 | hsa-miR-541      | MI0005539 | UGGUGGGCACAGAAUCUGGACU    |
| Plate 8 | B02 | C-301231-01 | hsa-miR-541*     | MI0005539 | AAAGGAUUCUGCUGUCGGUCCACU  |
| Plate 8 | B03 | C-301232-01 | hsa-miR-889      | MI0005540 | UUAAUAUCGGACAACCAUUGU     |
| Plate 8 | B04 | C-301233-01 | hsa-miR-875-5p   | MI0005541 | UAUACCUCAGUUUUUAUCAGGUG   |
| Plate 8 | B05 | C-301234-01 | hsa-miR-875-3p   | MI0005541 | CCUGGAAACACUGAGGUUGUG     |
| Plate 8 | B06 | C-301235-01 | hsa-miR-876-5p   | MI0005542 | UGGAUUUCUUUGUGAAUCACCA    |
| Plate 8 | B07 | C-301236-01 | hsa-miR-876-3p   | MI0005542 | UGGUGGUUUACAAAGUAAUUCA    |
| Plate 8 | B08 | C-301237-01 | hsa-miR-708*     | MI0005543 | CAACUAGACUGUGAGCUUCUAG    |
| Plate 8 | B09 | C-301238-01 | hsa-miR-708      | MI0005543 | AAGGAGCUUACAAUCUAGCUGGG   |
| Plate 8 | B10 | C-301239-01 | hsa-miR-147b     | MI0005544 | GUGUGCGGAAAUGCUUCUGCUA    |
| Plate 8 | B11 | C-301240-01 | hsa-miR-190b     | MI0005545 | UGAU AUGUUUGAU AUUGGGUU   |
| Plate 8 | C02 | C-301241-01 | hsa-miR-744*     | MI0005559 | CUGUUGCCACUAACCUCAACCU    |
| Plate 8 | C03 | C-301242-01 | hsa-miR-744      | MI0005559 | UGC GGGGCUAGGGCUAACAGCA   |
| Plate 8 | C04 | C-301243-01 | hsa-miR-885-5p   | MI0005560 | UCCAUUACACUACCCUGCCUCU    |
| Plate 8 | C05 | C-301244-01 | hsa-miR-885-3p   | MI0005560 | AGGCAGCGGGGUGUAGUGGAUA    |
| Plate 8 | C06 | C-301245-01 | hsa-miR-887      | MI0005562 | GUGAACGGGCGCCAUCCCGAGG    |
| Plate 8 | C07 | C-301246-01 | hsa-miR-665      | MI0005563 | ACCAGGAGGCUGAGGCCCCU      |
| Plate 8 | C08 | C-301247-01 | hsa-miR-873      | MI0005564 | GCAGGAACUUGUGAGUCUCCU     |
| Plate 8 | C09 | C-301248-01 | hsa-miR-543      | MI0005565 | AAACAUUCGCGGUGCACUUCUU    |
| Plate 8 | C10 | C-301249-01 | hsa-miR-374b*    | MI0005566 | CUUAGCAGGUUGUAUUAUCAUU    |
| Plate 8 | C11 | C-301250-01 | hsa-miR-374b     | MI0005566 | AUAUAUAACAACCUGCUAAGUG    |
| Plate 8 | D02 | C-301251-01 | hsa-miR-760      | MI0005567 | CGGCUCUGGGUCUGUGGGGA      |
| Plate 8 | D03 | C-301252-01 | hsa-miR-301b     | MI0005568 | CAGUGCAAUGAU AUUGUCA AAGC |
| Plate 8 | D04 | C-301207-01 | hsa-miR-93*      | MI0000095 | ACUGCUGAGCUAGCACU UCCCG   |
| Plate 8 | D05 | C-301208-01 | hsa-miR-219-1-3p | MI0000296 | AGAGUUGAGUCUGGACGUCCCG    |
| Plate 8 | D06 | C-301209-01 | hsa-miR-671-3p   | MI0003760 | UCCGGUUCUCAGGGCUCCACC     |
| Plate 8 | D07 | C-301204-01 | hsa-let-7f-1*    | MI0000067 | CUAUACAAUCUAUUGCCU UCCC   |
| Plate 8 | D08 | C-300500-05 | hsa-miR-26a      | MI0000750 | UUCAAGUAAUCCAGGAUAGGCU    |
| Plate 8 | D09 | C-300519-05 | hsa-miR-101      | MI0000739 | UACAGUACUGUGAU AACUGAA    |
| Plate 8 | D10 | C-300530-05 | hsa-miR-196a     | MI0000279 | UAGGUAGUUUCAUGUUGUUGGG    |
| Plate 8 | D11 | C-300560-05 | hsa-miR-187      | MI0000274 | UCGUGUCUUGUGUUGCAGCCGG    |
| Plate 8 | E02 | C-300583-05 | hsa-let-7g       | MI0000433 | UGAGGUAGUAGUUUGUACAGUU    |
| Plate 8 | E03 | C-300584-05 | hsa-let-7i       | MI0000434 | UGAGGUAGUAGUUUGUGCUGUU    |
| Plate 8 | E04 | C-300585-05 | hsa-miR-1        | MI0000437 | UGGAAUGUAAAGAAGUAUGUAU    |
| Plate 8 | E05 | C-300586-05 | hsa-miR-1        | MI0000651 | UGGAAUGUAAAGAAGUAUGUAU    |
| Plate 8 | E06 | C-300591-05 | hsa-miR-122a     | MI0000442 | UGGAGUGUGACAAUGGUGUUUG    |
| Plate 8 | E07 | C-300592-05 | hsa-miR-124a     | MI0000443 | UAAGGCACGCGGUGAAUGCC      |
| Plate 8 | E08 | C-300593-05 | hsa-miR-124a     | MI0000444 | UAAGGCACGCGGUGAAUGCC      |
| Plate 8 | E09 | C-300594-05 | hsa-miR-124a     | MI0000445 | UAAGGCACGCGGUGAAUGCC      |
| Plate 8 | E10 | C-300600-05 | hsa-miR-133a     | MI0000450 | UUUGGUCCCCUUCAACCAGCUG    |
| Plate 8 | E11 | C-300601-05 | hsa-miR-133a     | MI0000451 | UUUGGUCCCCUUCAACCAGCUG    |
| Plate 8 | F02 | C-300605-05 | hsa-miR-138      | MI0000455 | AGCUGGUGUUGUGAAUCAGGCCG   |
| Plate 8 | F03 | C-300606-05 | hsa-miR-138      | MI0000476 | AGCUGGUGUUGUGAAUCAGGCCG   |
| Plate 8 | F04 | C-300607-05 | hsa-miR-140      | MI0000456 | CAGUGGUUUUACCCUAUGGUAG    |

|         |     |             |                |           |                          |
|---------|-----|-------------|----------------|-----------|--------------------------|
| Plate 8 | F05 | C-300609-05 | hsa-miR-142-5p | MI0000458 | CAUAAAGUAGAAAGCACUACU    |
| Plate 8 | F06 | C-300611-05 | hsa-miR-143    | MI0000459 | UGAGAUGAAGCACUGUAGCUC    |
| Plate 8 | F07 | C-300612-05 | hsa-miR-144    | MI0000460 | UACAGUAUAGAUGAUGUACU     |
| Plate 8 | F08 | C-300613-05 | hsa-miR-145    | MI0000461 | GUCCAGUUUUUCCCAGGAAUCCCU |
| Plate 8 | F09 | C-300614-05 | hsa-miR-152    | MI0000462 | UCAGUGCAUGACAGAACUUGG    |
| Plate 8 | F10 | C-300617-05 | hsa-miR-191    | MI0000465 | CAACGGAAUCCCAAAGCAGCUG   |
| Plate 8 | F11 | C-300622-05 | hsa-miR-9*     | MI0000467 | AUAAAGCUAGAUAAACCGAAAGU  |
| Plate 8 | G02 | C-300623-05 | hsa-miR-9*     | MI0000468 | AUAAAGCUAGAUAAACCGAAAGU  |
| Plate 8 | G03 | C-300624-05 | hsa-miR-125a   | MI0000469 | UCCUGAGACCCUUUAACCUUGUGA |
| Plate 8 | G04 | C-300628-05 | hsa-miR-134    | MI0000474 | UGUGACUGGUUGACCAGAGGGG   |
| Plate 8 | G05 | C-300640-05 | hsa-miR-193a   | MI0000487 | AACUGGCCUACAAAGUCCAGU    |
| Plate 8 | G06 | C-300645-05 | hsa-miR-320    | MI0000542 | AAAAGCUGGGUUGAGAGGGGCGA  |
| Plate 8 | G07 | C-300646-05 | hsa-miR-200c   | MI0000650 | UAAUACUGCCGGGUAUGAUGGA   |
| Plate 8 | G08 | C-300647-05 | hsa-miR-155    | MI0000681 | UAAUUGC UAAUCGUGAUAGGGGU |
| Plate 8 | G09 | C-300674-05 | hsa-miR-368    | MI0000776 | AACAUAGAGGAAAUCCACGU     |
| Plate 8 | G10 | C-300676-05 | hsa-miR-370    | MI0000778 | GCCUGCUGGGGUGGAACCUGGU   |
| Plate 8 | G11 | C-300677-05 | hsa-miR-371    | MI0000779 | AAGUGCCGCCAUCUUUUGAGUGU  |
| Plate 8 | H02 | C-300686-05 | hsa-miR-422b   | MI0000786 | ACUGGACUUGGAGUCAGAAGG    |
| Plate 8 | H03 | C-300687-05 | hsa-miR-379    | MI0000787 | UGGUAGACUAUGGAACGUAGG    |
| Plate 8 | H04 | C-300693-05 | hsa-miR-340    | MI0000802 | UCCGUCUCAGUUACUUUAUAGC   |
| Plate 8 | H05 | C-300696-05 | hsa-miR-342    | MI0000805 | UCUCACACAGAAAUCGCACCCGU  |
| Plate 8 | H06 | C-300697-05 | hsa-miR-337    | MI0000806 | CUCCUAUAUGAUGCCUUUCUUC   |
| Plate 8 | H07 | C-300698-05 | hsa-miR-323    | MI0000807 | CACAUUACACGGUCGACCUCU    |
| Plate 8 | H08 | C-300700-05 | hsa-miR-151    | MI0000809 | CUAGACUGAAGCUCCUUGAGG    |
| Plate 8 | H09 | C-300705-05 | hsa-miR-324-3p | MI0000813 | ACUGCCCCAGGUGCUGCUGG     |
| Plate 8 | H10 | C-300706-05 | hsa-miR-338    | MI0000814 | UCCAGCAUCAGUGAUUUUGUUG   |
| Plate 8 | H11 | C-300709-05 | hsa-miR-133b   | MI0000822 | UUUGGUCCCCUUCAACCAGCUA   |
| Plate 9 | A02 | C-300711-05 | hsa-miR-345    | MI0000825 | GCUGACUCCUAGUCCAGGGCUC   |
| Plate 9 | A03 | C-300715-05 | hsa-miR-422a   | MI0001444 | ACUGGACUUAGGGUCAGAAGGC   |
| Plate 9 | A04 | C-300716-05 | hsa-miR-423    | MI0001445 | AGCUCGGUCUGAGGCCCCUCAGU  |
| Plate 9 | A05 | C-300733-05 | hsa-miR-453    | MI0001727 | AGGUUGUCCGUGGUGAGUUCGCA  |
| Plate 9 | A06 | C-300737-05 | hsa-miR-409-5p | MI0001735 | AGGUUACCCGAGCAACUUUGCAU  |
| Plate 9 | A07 | C-300738-05 | hsa-miR-409-3p | MI0001735 | GAAUGUUGCUCGGUGAACCCCU   |
| Plate 9 | A08 | C-300742-05 | hsa-miR-483    | MI0002467 | UCACUCCUCUCCUCCCGUCUU    |
| Plate 9 | A09 | C-300751-05 | hsa-miR-491    | MI0003126 | AGUGGGGAACCCUCCAUGAGG    |
| Plate 9 | A10 | C-300761-05 | hsa-miR-494    | MI0003134 | UGAAACAUACACGGGAAACCUC   |
| Plate 9 | A11 | C-300762-05 | hsa-miR-495    | MI0003135 | AAACAAACAUGGUGCACUUCUU   |
| Plate 9 | B02 | C-300763-05 | hsa-miR-496    | MI0003136 | UGAGUAUUACAUGGCCAAUCUC   |
| Plate 9 | B03 | C-300764-05 | hsa-miR-193b   | MI0003137 | AACUGGCCCUCAAAGUCCCGCU   |
| Plate 9 | B04 | C-300766-05 | hsa-miR-181d   | MI0003139 | AACAUUCAUUGUUGUCGGUGGGU  |
| Plate 9 | B05 | C-300775-05 | hsa-miR-515-3p | MI0003144 | GAGUGCCUUCUUUUGGAGCGUU   |
| Plate 9 | B06 | C-300776-05 | hsa-miR-515-3p | MI0003147 | GAGUGCCUUCUUUUGGAGCGUU   |
| Plate 9 | B07 | C-300778-05 | hsa-miR-519e   | MI0003145 | AAGUGCCUCCUUUUAGAGUGUU   |
| Plate 9 | B08 | C-300780-05 | hsa-miR-526c   | MI0003148 | CUCUAGAGGGGAAGCGCUUCUG   |
| Plate 9 | B09 | C-300789-05 | hsa-miR-526b   | MI0003150 | CUCUUGAGGGGAAGCACUUUCUGU |
| Plate 9 | B10 | C-300790-05 | hsa-miR-526b*  | MI0003150 | GAAAGUGCUUCCUUUUAGAGGC   |
| Plate 9 | B11 | C-300791-05 | hsa-miR-519b   | MI0003151 | AAAGUGCAUCCUUUUAGAGGUU   |

|         |     |             |                |           |                         |
|---------|-----|-------------|----------------|-----------|-------------------------|
| Plate 9 | C02 | C-300793-05 | hsa-miR-525*   | MI0003152 | GAAGGCGCUUCCCUUUAGAGCG  |
| Plate 9 | C03 | C-300794-05 | hsa-miR-523    | MI0003153 | GAACGCGCUUCCCUAUAGAGGGU |
| Plate 9 | C04 | C-300795-05 | hsa-miR-518f*  | MI0003154 | CUCUAGAGGGGAAGCACUUUCUC |
| Plate 9 | C05 | C-300796-05 | hsa-miR-518f   | MI0003154 | GAAAGCGCUUCUCUUUAGAGG   |
| Plate 9 | C06 | C-300799-05 | hsa-miR-526a   | MI0003157 | CUCUAGAGGGGAAGCACUUUCUG |
| Plate 9 | C07 | C-300801-05 | hsa-miR-526a   | MI0003168 | CUCUAGAGGGGAAGCACUUUCUG |
| Plate 9 | C08 | C-300803-05 | hsa-miR-520c   | MI0003158 | AAAGUGCUUCCUUUUAGAGGGU  |
| Plate 9 | C09 | C-300805-05 | hsa-miR-518c   | MI0003159 | CAAAGCGCUUCUCUUUAGAGUGU |
| Plate 9 | C10 | C-300811-05 | hsa-miR-517a   | MI0003161 | AUCGUGCAUCCCUUUAGAGUGU  |
| Plate 9 | C11 | C-300812-05 | hsa-miR-519d   | MI0003162 | CAAAGUGCCUCCCUUUAGAGUG  |
| Plate 9 | D02 | C-300815-05 | hsa-miR-520d*  | MI0003164 | CUACAAAGGGAAGCCCUUUC    |
| Plate 9 | D03 | C-300816-05 | hsa-miR-520d   | MI0003164 | AAAGUGCUUCUCUUUGGUGGGU  |
| Plate 9 | D04 | C-300819-05 | hsa-miR-516-5p | MI0003167 | AUCUGGAGGUAAGAAGCACUUU  |
| Plate 9 | D05 | C-300820-05 | hsa-miR-516-5p | MI0003172 | AUCUGGAGGUAAGAAGCACUUU  |
| Plate 9 | D06 | C-300825-05 | hsa-miR-518e   | MI0003169 | AAAGCGCUUCCCUUCAGAGUG   |
| Plate 9 | D07 | C-300827-05 | hsa-miR-527    | MI0003179 | CUGCAAAGGGAAGCCCUUUC    |
| Plate 9 | D08 | C-300828-05 | hsa-miR-518a   | MI0003170 | GAAAGCGCUUCCCUUUGCUGGA  |
| Plate 9 | D09 | C-300829-05 | hsa-miR-518a   | MI0003173 | GAAAGCGCUUCCCUUUGCUGGA  |
| Plate 9 | D10 | C-300834-05 | hsa-miR-522    | MI0003177 | AAAUGGUUCCCUUUAGAGUGU   |
| Plate 9 | D11 | C-300835-05 | hsa-miR-519a   | MI0003178 | AAAGUGCAUCCUUUAGAGUGU   |
| Plate 9 | E02 | C-300836-05 | hsa-miR-519a   | MI0003182 | AAAGUGCAUCCUUUAGAGUGU   |
| Plate 9 | E03 | C-300837-05 | hsa-miR-499    | MI0003183 | UUAAGACUUGCAGUGAUGUUU   |
| Plate 9 | E04 | C-300858-03 | hsa-miR-493-3p | MI0003132 | UGAAGGUCUACUGUGUGCCAGG  |
| Plate 9 | E05 | C-300860-03 | hsa-miR-544    | MI0003515 | AUUCUGCAUUUUUAGCAAGUUC  |
| Plate 9 | E06 | C-300865-03 | hsa-miR-376a*  | MI0000784 | GUAGAUUCUCCUUCUAUGAGUA  |
| Plate 9 | E07 | C-300851-07 | hsa-miR-514    | MI0003198 | AUUGACACUUCUGUGAGUAGA   |
| Plate 9 | E08 | C-300852-07 | hsa-miR-514    | MI0003199 | AUUGACACUUCUGUGAGUAGA   |
| Plate 9 | E09 | C-300853-07 | hsa-miR-514    | MI0003200 | AUUGACACUUCUGUGAGUAGA   |
| Plate 9 | E10 | C-300872-03 | hsa-miR-92b    | MI0003560 | UAUUGCACUCGUCCCGGCCUCC  |
| Plate 9 | E11 | C-300874-03 | hsa-miR-556    | MI0003562 | GAUGAGCUCAUUGUAAUAUGAG  |
| Plate 9 | F02 | C-300889-03 | hsa-miR-570    | MI0003577 | CGAAAACAGCAAUUACCUUUGC  |
| Plate 9 | F03 | C-300893-03 | hsa-miR-574    | MI0003581 | CACGCUCAUGCACACACCCACA  |
| Plate 9 | F04 | C-300895-03 | hsa-miR-576    | MI0003583 | AUUCUAAUUUCUCCACGUCUUU  |
| Plate 9 | F05 | C-300898-03 | hsa-miR-579    | MI0003586 | UUCAUUUGGUAAUAACCGCAUU  |
| Plate 9 | F06 | C-300940-03 | hsa-miR-615    | MI0003628 | UCCGAGCCUGGGUCUCCUCUU   |
| Plate 9 | F07 | C-300951-03 | hsa-miR-625    | MI0003639 | AGGGGAAAGUUCUAUAGUCC    |
| Plate 9 | F08 | C-300954-03 | hsa-miR-628    | MI0003642 | UCUAGUAAGAGUGGCAGUCGA   |
| Plate 9 | F09 | C-300958-03 | hsa-miR-33b    | MI0003646 | GUGCAUUGCUGUUGCAUUGC    |
| Plate 9 | F10 | C-300963-03 | hsa-miR-636    | MI0003651 | UGUGCUUGCUCGUCCCGCCGCA  |
| Plate 9 | F11 | C-300979-03 | hsa-miR-652    | MI0003667 | AAUGGCGCCACUAGGGUUGUG   |
| Plate 9 | G02 | C-300986-03 | hsa-miR-653    | MI0003674 | GUGUUGAAACAAUCUCUACUG   |
| Plate 9 | G03 | C-300718-07 | hsa-miR-425    | MI0001448 | AUCGGGAAUGUCGUGUCCGCC   |
| Plate 9 | G04 | C-300518-07 | hsa-miR-101    | MI0000103 | UACAGUACUGUGAUAAUCUGAA  |
| Plate 9 | G05 | C-300509-07 | hsa-miR-33     | MI0000091 | GUGCAUUGUAGUUGCAUUGCA   |
| Plate 9 | G06 | C-300511-07 | hsa-miR-92     | MI0000094 | UAUUGCACUUGUCCCGGCCUGU  |
| Plate 9 | G07 | C-300495-07 | hsa-miR-189    | MI0000080 | UGCCUACUGAGCUGAUUUCAGU  |
| Plate 9 | G08 | C-300725-07 | hsa-miR-450    | MI0003187 | UUUUGCGAUGUGUUCCUAAUAU  |
| Plate 9 | G09 | C-300724-07 | hsa-miR-450    | MI0001652 | UUUUGCGAUGUGUUCCUAAUAU  |

|          |     |             |                |           |                          |
|----------|-----|-------------|----------------|-----------|--------------------------|
| Plate 9  | G10 | C-300582-07 | hsa-miR-200b   | MI0000342 | UAAUACUGCCUGGUAUAUGAUGA  |
| Plate 9  | G11 | C-300551-07 | hsa-miR-34a    | MI0000268 | UGGCAGUGUCUUAGCUGGUUGU   |
| Plate 9  | H02 | C-300844-07 | hsa-miR-513    | MI0003191 | UUCACAGGGAGGUGUCAU       |
| Plate 9  | H03 | C-300845-07 | hsa-miR-513    | MI0003192 | UUCACAGGGAGGUGUCAU       |
| Plate 9  | H04 | C-300631-07 | hsa-miR-149    | MI0000478 | UCUGGCUCCGUGUCUUCACUCCC  |
| Plate 9  | H05 | C-300546-07 | hsa-miR-7      | MI0000263 | UGGAAGACUAGUGAUUUUGUUGU  |
| Plate 9  | H06 | C-300569-07 | hsa-miR-214    | MI0000290 | ACAGCAGGCACAGACAGGCAGU   |
| Plate 9  | H07 | C-300572-07 | hsa-miR-217    | MI0000293 | UACUGCAUCAGGAACUGAUUGGA  |
| Plate 9  | H08 | C-300626-07 | hsa-miR-126    | MI0000471 | UCGUACCGUGAGUAAUAAUGCG   |
| Plate 9  | H09 | C-300756-07 | hsa-miR-202    | MI0003130 | AGAGGUAUAGGGCAUGGGAA     |
| Plate 9  | H10 | C-300755-07 | hsa-miR-202*   | MI0003130 | UUCCUAUGCAUAUACUUCUUUG   |
| Plate 9  | H11 | C-300850-07 | hsa-miR-510    | MI0003197 | UACUCAGGAGAGUGGCAAUCAC   |
| Plate 10 | A02 | C-300501-07 | hsa-miR-26b    | MI0000084 | UUCAAGUAAUUCAGGAUAGGU    |
| Plate 10 | A03 | C-300604-07 | hsa-miR-137    | MI0000454 | UUAUUGCUUAAGAAUACGCGUAG  |
| Plate 10 | A04 | C-300526-07 | hsa-miR-106a   | MI0000113 | AAAAGUGCUUACAGUGCAGGUAG  |
| Plate 10 | A05 | C-300661-07 | hsa-miR-30e-5p | MI0000749 | UGUAAACAUCUUGACUGGAAG    |
| Plate 10 | A06 | C-300621-07 | hsa-miR-9*     | MI0000466 | AUAAAGCUAGAUAAACCGAAAGU  |
| Plate 10 | A07 | C-300668-07 | hsa-miR-302b*  | MI0000772 | ACUUUAACAUGGAAGUGCUIUC   |
| Plate 10 | A08 | C-300652-07 | hsa-miR-302a*  | MI0000738 | ACUUAACGUGGAUGUACUUGCU   |
| Plate 10 | A09 | C-300849-07 | hsa-miR-509    | MI0003196 | UGAUUGGUACGUCUGUGGGUAG   |
| Plate 10 | A10 | C-300843-07 | hsa-miR-505    | MI0003190 | CGUCAACACUUGCUGGUUCCU    |
| Plate 10 | A11 | C-300842-07 | hsa-miR-504    | MI0003189 | AGACCCUGGUCUGCACUCUAUC   |
| Plate 10 | B02 | C-300550-07 | hsa-miR-10b    | MI0000267 | UACCCUGUAGAACCGAAUUUGUG  |
| Plate 10 | B03 | C-300571-07 | hsa-miR-216    | MI0000292 | UAAUCUCAGCUGGCAACUGUGA   |
| Plate 10 | B04 | C-300581-07 | hsa-miR-224    | MI0000301 | CAAGUCACUAGUGGUUCCGUU    |
| Plate 10 | B05 | C-300579-07 | hsa-miR-222    | MI0000299 | AGCUACAUCUGGCUACUGGGU    |
| Plate 10 | B06 | C-300504-07 | hsa-miR-29a    | MI0000087 | UAGCACCAUCUGAAAUCGGUUA   |
| Plate 10 | B07 | C-300650-07 | hsa-miR-29c    | MI0000735 | UAGCACCAUUUGAAAUCGGUUA   |
| Plate 10 | B08 | C-300508-07 | hsa-miR-32     | MI0000090 | UAUUGCACAUUACUAAGUUGCA   |
| Plate 10 | B09 | C-300735-07 | hsa-miR-452    | MI0001733 | AACUGUUUGCAGAGGAAACUGA   |
| Plate 10 | B10 | C-300736-07 | hsa-miR-452*   | MI0001733 | CUCAUCUGCAAAGAAGUAAGUG   |
| Plate 10 | B11 | C-300861-05 | hsa-miR-545    | MI0003516 | UCAGCAAACAUUUUUGUGUGC    |
| Plate 10 | C02 | C-300863-05 | hsa-miR-542-5p | MI0003686 | UCGGGGAUCAUCAUGUCACGAGA  |
| Plate 10 | C03 | C-300707-07 | hsa-miR-339    | MI0000815 | UCCUGUCCUCCAGGAGCUCACG   |
| Plate 10 | C04 | C-300719-07 | hsa-miR-18b    | MI0001518 | UAAGGUGCAUCUAGUGCAGUUAG  |
| Plate 10 | C05 | C-300478-07 | hsa-let-7d     | MI0000065 | AGAGGUAGUAGGUUGCAUAGUU   |
| Plate 10 | C06 | C-300749-07 | hsa-miR-489    | MI0003124 | GUGACAUCACAUUACGGCAGC    |
| Plate 10 | C07 | C-300638-07 | hsa-miR-188    | MI0000484 | CAUCCCUUGCAUGGUGGAGGG    |
| Plate 10 | C08 | C-300637-07 | hsa-miR-186    | MI0000483 | CAAAGAAUUCUCCUUUUGGGCU   |
| Plate 10 | C09 | C-300636-07 | hsa-miR-185    | MI0000482 | UGGAGAGAAAGGCAGUCCUGA    |
| Plate 10 | C10 | C-300559-07 | hsa-miR-183    | MI0000273 | UAUGGCACUGGUAGAAUUCACU   |
| Plate 10 | C11 | C-300557-07 | hsa-miR-182    | MI0000272 | UUUGGCAAUGGUAGAACUCACACU |
| Plate 10 | D02 | C-300615-07 | hsa-miR-153    | MI0000463 | UUGCAUAGUCACAAAAGUGAUC   |
| Plate 10 | D03 | C-300616-07 | hsa-miR-153    | MI0000464 | UUGCAUAGUCACAAAAGUGAUC   |
| Plate 10 | D04 | C-300524-07 | hsa-miR-105    | MI0000111 | UCAAUUGCUCAGACUCCUGUGGU  |
| Plate 10 | D05 | C-300580-07 | hsa-miR-223    | MI0000300 | UGUCAGUUUGUCAAAUACCCCA   |
| Plate 10 | D06 | C-300701-07 | hsa-miR-135b   | MI0000810 | UAUGGCUUUUCAUUCCUAUGUGA  |

|          |     |             |                  |           |                            |
|----------|-----|-------------|------------------|-----------|----------------------------|
| Plate 10 | D07 | C-300714-07 | hsa-miR-196b     | MI0001150 | UAGGUAGUUUCCUGUUGUUGGG     |
| Plate 10 | D08 | C-300536-07 | hsa-miR-199a*    | MI0000281 | ACAGUAGUCUGCACAUUGGUUA     |
| Plate 10 | D09 | C-300554-07 | hsa-miR-181b     | MI0000270 | AACAUUCAUUGCUGUCGGUGGGU    |
| Plate 10 | D10 | C-300555-07 | hsa-miR-181b     | MI0000683 | AACAUUCAUUGCUGUCGGUGGGU    |
| Plate 10 | D11 | C-300525-07 | hsa-miR-105      | MI0000112 | UCAAUUGCUCAGACUCCUGUGGU    |
| Plate 10 | E02 | C-300597-07 | hsa-miR-128a     | MI0000447 | UCACAGUGAACCGGUCUCUUU      |
| Plate 10 | E03 | C-300514-07 | hsa-miR-96       | MI0000098 | UUUGGCACUAGCACAUUUUUGCU    |
| Plate 10 | E04 | C-300512-07 | hsa-miR-93       | MI0000095 | CAAAGUGCUGUUCGUGCAGGUAG    |
| Plate 10 | E05 | C-301000-03 | hsa-miR-671      | MI0003760 | AGGAAGCCUGGAGGGGCUGGAG     |
| Plate 10 | E06 | C-301004-03 | hsa-miR-454-3p   | MI0003820 | UAGUGCAAUAUUGCUUAUAGGGU    |
| Plate 10 | E07 | C-301253-01 | hsa-miR-216b     | MI0005569 | AAAUCUCUGCAGGCAAUGUGA      |
| Plate 10 | E08 | C-301254-01 | hsa-miR-208b     | MI0005570 | AUAAGACGAACAAAAGGUUUGU     |
| Plate 10 | E09 | C-301255-01 | hsa-miR-920      | MI0005712 | GGGGAGCUGUGGAAGCAGUA       |
| Plate 10 | E10 | C-301256-01 | hsa-miR-921      | MI0005713 | CUAGUGAGGGACAGAACCAGGAUUC  |
| Plate 10 | E11 | C-301257-01 | hsa-miR-922      | MI0005714 | GCAGCAGAGAAUAGGACUACGUC    |
| Plate 10 | F02 | C-301258-01 | hsa-miR-923      | MI0005715 | GUCAGCGGAGGAAAAGAAACU      |
| Plate 10 | F03 | C-301259-01 | hsa-miR-924      | MI0005716 | AGAGUCUUGUGAUGUCUUGC       |
| Plate 10 | F04 | C-301260-01 | hsa-miR-509-3-5p | MI0005717 | UACUGCAGACGUGGCAAUCAUG     |
| Plate 10 | F05 | C-301261-01 | hsa-miR-509-3p   | MI0005717 | UGAUUGGUACGUCUGUGGGUAG     |
| Plate 10 | F06 | C-301262-01 | hsa-miR-933      | MI0005755 | UGUGCGCAGGGAGACCUCUCCC     |
| Plate 10 | F07 | C-301263-01 | hsa-miR-934      | MI0005756 | UGUCUACUACUGGAGACACUGG     |
| Plate 10 | F08 | C-301264-01 | hsa-miR-935      | MI0005757 | CCAGUUACCGCUUCCGCUACCGC    |
| Plate 10 | F09 | C-301265-01 | hsa-miR-936      | MI0005758 | ACAGUAGAGGGAGGAAUCGCAG     |
| Plate 10 | F10 | C-301266-01 | hsa-miR-937      | MI0005759 | AUCCGCGCUCUGACUCUCUGCC     |
| Plate 10 | F11 | C-301267-01 | hsa-miR-938      | MI0005760 | UGCCCUAAAAGGUGAACCCAGU     |
| Plate 10 | G02 | C-301268-01 | hsa-miR-939      | MI0005761 | UGGGGAGCUGAGGCUCUGGGGGUG   |
| Plate 10 | G03 | C-301269-01 | hsa-miR-940      | MI0005762 | AAGGCAGGGCCCCCGCUCCCC      |
| Plate 10 | G04 | C-301270-01 | hsa-miR-941      | MI0005763 | CACCCGGCUGUGUGCACAUGUGC    |
| Plate 10 | G05 | C-301271-01 | hsa-miR-941      | MI0005764 | CACCCGGCUGUGUGCACAUGUGC    |
| Plate 10 | G06 | C-301272-01 | hsa-miR-941      | MI0005765 | CACCCGGCUGUGUGCACAUGUGC    |
| Plate 10 | G07 | C-301273-01 | hsa-miR-941      | MI0005766 | CACCCGGCUGUGUGCACAUGUGC    |
| Plate 10 | G08 | C-301274-01 | hsa-miR-942      | MI0005767 | UCUUCUCUGUUUUGGCCAUGUG     |
| Plate 10 | G09 | C-301275-01 | hsa-miR-943      | MI0005768 | CUGACUGUUGCCGUCCUCCAG      |
| Plate 10 | G10 | C-301276-01 | hsa-miR-944      | MI0005769 | AAAUUAUUGUACAUCGGAUGAG     |
| Plate 10 | G11 | C-301277-01 | hsa-miR-1224-5p  | MI0003764 | GUGAGGACUCGGGAGGUGG        |
| Plate 10 | H02 | C-301278-01 | hsa-miR-1224-3p  | MI0003764 | CCCCACCUCCUCUCUCCUCAG      |
| Plate 10 | H03 | C-301279-01 | hsa-miR-877      | MI0005561 | GUAGAGGAGAUGGCGCAGGG       |
| Plate 10 | H04 | C-301280-01 | hsa-miR-877*     | MI0005561 | UCCUCUUCUCCUCCUCCAG        |
| Plate 10 | H05 | C-301281-01 | hsa-miR-1225-5p  | MI0006311 | GUGGGUACGGCCCAGUGGGGGG     |
| Plate 10 | H06 | C-301282-01 | hsa-miR-1225-3p  | MI0006311 | UGAGCCCCUGUGCCGCCCCAG      |
| Plate 10 | H07 | C-301283-01 | hsa-miR-1226*    | MI0006313 | GUGAGGGCAUGCAGGCCUGGAUGGGG |
| Plate 10 | H08 | C-301284-01 | hsa-miR-1226     | MI0006313 | UCACCAGCCCUGUGUUCUUCCAG    |
| Plate 10 | H09 | C-301285-01 | hsa-miR-1227     | MI0006316 | CGUGCCACCCUUUUCUUCCAG      |
| Plate 10 | H10 | C-301286-01 | hsa-miR-1228     | MI0006318 | UCACACCGCCUCGCCCCCC        |
| Plate 10 | H11 | C-301287-01 | hsa-miR-1228*    | MI0006318 | GUGGGCGGGGGCAGGUGUGUG      |
| Plate 11 | A02 | C-301288-01 | hsa-miR-1229     | MI0006319 | CUCUCACCACUGCCCUCUCCACAG   |
| Plate 11 | A03 | C-301289-01 | hsa-miR-1231     | MI0006321 | GUGUCUGGGCGGACAGCUGC       |

|          |     |             |              |           |                         |
|----------|-----|-------------|--------------|-----------|-------------------------|
| Plate 11 | A04 | C-301290-01 | hsa-miR-1233 | MI0006323 | UGAGCCCUGUCCUCCCGCAG    |
| Plate 11 | A05 | C-301291-01 | hsa-miR-1234 | MI0006324 | UCGGCCUGACCACCCACCCAC   |
| Plate 11 | A06 | C-301292-01 | hsa-miR-1236 | MI0006326 | CCUCUCCCCUUGUCUCUCCAG   |
| Plate 11 | A07 | C-301293-01 | hsa-miR-1237 | MI0006327 | UCCUUCUGCUCCGUCCCCAG    |
| Plate 11 | A08 | C-301294-01 | hsa-miR-1238 | MI0006328 | CUUCCUCGUCUGUCUGCCCC    |
| Plate 11 | A09 | C-301295-01 | hsa-miR-513b | MI0006648 | UUCACAAGGAGGUGUCAUUUUAU |
| Plate 11 | A10 | C-301296-01 | hsa-miR-513c | MI0006649 | UUCUCAAGGAGGUGUCGUUUUAU |
| Plate 11 | A11 | C-300734-05 | hsa-miR-451  | MI0001729 | AAACCGUUACCAUUACUGAGUU  |
