# Supplementary material for: A Network-Based Method to Assess the Statistical Significance of Mild Co-Regulation Effects
Source: PubMed Central journal article supplement (PMC3767771; doi:10.1371/journal.pone.0073413), 2013-09-09
Supplement: pone.0073413.s005.pdf [file pone.0073413.s005.pdf]

$\tau_B = 0.01$  and  $\tau_p = 0.0509$

| miRNA          | SICORE group | mature sequence         | seed sequence |
|----------------|--------------|-------------------------|---------------|
| hsa-miR-99a    | 1            | AACCCGUAGAUCCGAUCUUGUG  | ACCCGU        |
| hsa-miR-767-3p | 1            | UCUGCUCAUACCCCAUGGUUUCU | CUGCUC        |
| hsa-miR-496    | 1            | UGAGUAUUACAUGGCCAAUCUC  | GAGUUA        |
| hsa-miR-421    | 1            | AUCAACAGACAUUAAUUGGGCGC | UCAACA        |
| hsa-miR-202    | 1            | AGAGGUUAUAGGGCAUGGGAA   | GAGGUA        |
| hsa-miR-127-5p | 1            | CUGAAGCUCAGAGGGCUCUGAU  | UGAAGC        |
| hsa-miR-100    | 1            | AACCCGUAGAUCCGAACUUGUG  | ACCCGU        |
| hsa-miR-940    | 4            | AAGGCAGGGCCCCCGCUCCCC   | AGGCAG        |
| hsa-miR-527    | 4            | CUGCAAAGGGAAGCCCUUUC    | UGCAAA        |
| hsa-miR-449    | 4            | UGGCAGUGUAUUGUUAGCUGGU  | GGCAGU        |
| hsa-miR-34b*   | 4            | UAGGCAGUGUCAUUAGCUGAUUG | AGGCAG        |
| hsa-miR-34a    | 4            | UGGCAGUGUCUUAGCUGGUUGU  | GGCAGU        |
| hsa-miR-938    | 5            | UGCCCUUAAAGGUGAACCCAGU  | GCCCUU        |
| hsa-miR-610    | 5            | UGAGCUAAAUGUGUGCUGGGA   | GAGCUA        |
| hsa-miR-521    | 5            | AACGCACUUCCCUUUAGAGUGU  | ACGCAC        |
| hsa-miR-519a   | 5            | AAAGUGCAUCCUUUUAGAGUGU  | AAGUGC        |
| hsa-miR-31     | 5            | AGGCAAGAUGCUGGCAUAGCU   | GGCAAG        |
| hsa-miR-196a*  | 5            | CGGCAACAAGAAACUGCCUGAG  | GGCAAC        |
| hsa-miR-18a    | 5            | UAAGGUGCAUCUAGUGCAGAUAG | AAGGUG        |
| hsa-miR-936    | 6            | ACAGUAGAGGGAGGAAUCGCAG  | CAGUAG        |
| hsa-miR-520a   | 6            | AAAGUGCUCUCCCUUUGGACUGU | AAGUGC        |
| hsa-miR-220c   | 6            | ACACAGGGCUGUUGUGAAGACU  | CACAGG        |
| hsa-miR-144    | 6            | UACAGUAUAGAUGAUGUACU    | ACAGUA        |
| hsa-miR-924    | 7            | AGAGUCUUGUGAUGUCUUGC    | GAGUCU        |
| hsa-miR-627    | 7            | GUGAGUCUCUAAGAAAAGAGGA  | UGAGUC        |
| hsa-miR-499-3p | 7            | AACAUCACAGCAAGUCUGUGCU  | ACAUCA        |
| hsa-miR-429    | 7            | UAAUACUGUCUGGUAACCCGU   | AAUACU        |
| hsa-miR-331    | 7            | GCCCCUGGGCCUAUCCUAGAA   | CCCCUG        |
| hsa-miR-200c   | 7            | UAAUACUGCCGGGUAUUGAUGGA | AAUACU        |
| hsa-miR-200b   | 7            | UAAUACUGCCUGGUAUUGAUGA  | AAUACU        |
| hsa-miR-922    | 8            | GCAGCAGAGAAUAGGACUACGUC | CAGCAG        |
| hsa-miR-632    | 8            | GUGUCUGCUUCCUGUGGGA     | UGUCUG        |
| hsa-miR-631    | 8            | AGACCUGGCCAGACCUCAGC    | GACCUG        |
| hsa-miR-453    | 8            | AGGUUGUCCGUGGUGAGUUCGCA | GGUUGU        |
| hsa-miR-452    | 8            | AACUGUUUGCAGAGGAAACUGA  | ACUGUU        |
| hsa-miR-214    | 8            | ACAGCAGGCACAGACAGGCAGU  | CAGCAG        |
| hsa-miR-19b-1* | 8            | AGUUUUGCAGGUUUGCAUCCAGC | GUUUUG        |
| hsa-miR-1231   | 8            | GUGUCUGGGCGGACAGCUGC    | UGUCUG        |
| hsa-let-7f-1*  | 8            | CUAUACAUCUAUUGCCUUCUCC  | UAUACA        |
| hsa-let-7c*    | 8            | UAGAGUUACACCCUGGGAGUUA  | AGAGUU        |
| hsa-let-7b*    | 8            | CUAUACAACCUACUGCCUUCUCC | UAUACA        |
| hsa-miR-892a   | 10           | CACUGUGUCCUUUCUGCGUAG   | ACUGUG        |
| hsa-miR-28-3p  | 10           | CACUAGAUUGUGAGCUCCUGGA  | ACUAGA        |
| hsa-miR-148a*  | 10           | AAAGUUCUGAGACACUCCGACU  | AAGUUC        |
| hsa-miR-106b*  | 10           | CCGCACUGUGGGUACUUGCUGC  | CGCACU        |
| hsa-miR-891b   | 11           | UGCAACUUACCUGAGUCAUUGA  | GCAACU        |
| hsa-miR-548d   | 11           | CAAAAACACAGUUUCUUUUGC   | AAAAAC        |
| hsa-miR-18b    | 11           | UAAGGUGCAUCUAGUGCAGUUAG | AAGGUG        |
| hsa-miR-101    | 11           | UACAGUACUGUGAUAAACUGAA  | ACAGUA        |
| hsa-let-7i*    | 11           | CUGCAGCAAGCUACUGCCUUGCU | UGCGCA        |
| hsa-miR-885-3p | 12           | AGGCAGCGGGGUGUAGUGGAUA  | GGCAGC        |
| hsa-miR-624*   | 12           | UAGUACCAGUACCUUGUGUUCA  | AGUACC        |
| hsa-miR-491    | 12           | AGUGGGGAACCCUCCAUGAGG   | GUGGGG        |
| hsa-miR-17-3p  | 12           | ACUGCAGUGAAGGCACUUGUAG  | CUGCAG        |
| hsa-miR-151    | 12           | CUAGACUGAAGCUCUUGAGG    | UAGACU        |

|                 |    |                           |         |
|-----------------|----|---------------------------|---------|
| hsa-miR-137     | 12 | UUAUUGCUUAAGAAUACGCGUAG   | UAUUGC  |
| hsa-miR-126     | 12 | UCGUACCGUGAGUAAUAAUGCG    | CGUACC  |
| hsa-miR-874     | 13 | CUGCCCUGGCCCGAGGGACCGA    | UGCCCU  |
| hsa-miR-634     | 13 | AACCAGCACCCCAACUUUGGAC    | ACCAGC  |
| hsa-miR-612     | 13 | GCUGGGCAGGGCUUCUGAGCUCCU  | CUGGGC  |
| hsa-miR-593*    | 13 | AGGCACCAGCCAGGCAUUGCUCAGC | GGCACC  |
| hsa-miR-566     | 13 | GGGCGCCUGUGAUCCCAAC       | GGCGCC  |
| hsa-miR-376a*   | 13 | GUAGAUUCUCCUUCUAUGAGUA    | UAGAUU  |
| hsa-miR-323     | 13 | CACAUJACACGGUCGACCUCU     | ACAUUA  |
| hsa-miR-29c     | 13 | UAGCACCAUUUGAAAUCGGUUA    | AGCACC  |
| hsa-miR-29a     | 13 | UAGCACCAUCUGAAAUCGGUUA    | AGCACC  |
| hsa-miR-298     | 13 | AGCAGAAGCAGGGAGGUUCUCCCA  | GCAGAA  |
| hsa-miR-15a*    | 13 | CAGGCCAUUUUGUCUGCCUCA     | AGGCCA  |
| hsa-miR-671-3p  | 16 | UCCGGUUCUCAGGGCUCCACC     | CCGGUU  |
| hsa-miR-636     | 16 | UGUGCUUGCUCGUCGCCCGCA     | GUGCUU  |
| hsa-miR-185     | 16 | UGGAGAGAAAGGCAGUUCUGA     | GGAGAG  |
| hsa-miR-671     | 17 | AGGAAGCCUGGAGGGGCUUGAG    | GGAAAGC |
| hsa-miR-644     | 17 | AGUGUGGCUUUCUAGAGC        | GUGUGG  |
| hsa-miR-625     | 17 | AGGGGGAAAGUUCUAUAGUCC     | GGGGGA  |
| hsa-miR-490-5p  | 17 | CCAUGGAUCUCCAGGUGGGU      | CAUGGA  |
| hsa-miR-187     | 17 | UCGUGUCUUGUGUUGCAGCCGG    | CGUGUC  |
| hsa-miR-184     | 17 | UGGACGGAGAACUGAUAAAGGU    | GGACGG  |
| hsa-miR-151-5p  | 17 | UCGAGGAGCUCACAGUCUAGU     | CGAGGA  |
| hsa-miR-661     | 18 | UGCCUGGGUCUCUGGCCUGCGCGU  | GCCUGG  |
| hsa-miR-1       | 18 | UGGAAUGUAAAGAAGUAUGUAU    | GGAAUG  |
| hsa-miR-642     | 20 | GUCCUCUCCAAAUGUGUCUUG     | UCCUC   |
| hsa-miR-582-3p  | 20 | UAACUGGUUGAACAAACUGAACC   | AACUGG  |
| hsa-miR-556-3p  | 20 | AUAUUACCAUUAGCUCAUUUU     | UAUUAC  |
| hsa-miR-519e    | 20 | AAGUGCCUCCUUUUAGAGUGUU    | AGUGCC  |
| hsa-miR-515-3p  | 20 | GAGUGCCUUCUUUUUGGAGCGUU   | AGUGCC  |
| hsa-miR-511     | 20 | GUGUCUUUUGCUCUGCAGUCA     | UGUCUU  |
| hsa-miR-30e-3p  | 20 | CUUUCAGUCGGAUGUUUACAGC    | UUUCAG  |
| hsa-miR-1227    | 20 | CGUGCCACCCUUUUCCCCAG      | GUGCCA  |
| hsa-miR-637     | 21 | ACUGGGGGCUUUCGGGCUCUGCGU  | CUGGGG  |
| hsa-miR-517*    | 21 | CCUCUAGAUGGAAGCACUGUCU    | CUCUAG  |
| hsa-miR-21      | 21 | UAGCUUAUCAGACUGAUGUUGA    | AGCUUA  |
| hsa-miR-15b     | 21 | UAGCAGCACAUCAUGGUUUACA    | AGCAGC  |
| hsa-miR-613     | 25 | AGGAAUGUUCUUCUUUGCC       | GGAAUG  |
| hsa-miR-544     | 25 | AUUCUGCAUUUUUAGCAAGUUC    | UUCUGC  |
| hsa-miR-524*    | 25 | CUACAAAGGGAAGCACUUUCUC    | UACAAA  |
| hsa-miR-520d*   | 25 | CUACAAAGGGAAGCCUUUC       | UACAAA  |
| hsa-miR-493     | 25 | UUGUACAUGGUAGGCUUUCUU     | UGUACA  |
| hsa-miR-206     | 25 | UGGAAUGUAAGGAAGUGUGUGG    | GGAAUG  |
| hsa-miR-155     | 25 | UUAAUGC UAAUCGUGAUAGGGGU  | UAAUGC  |
| hsa-miR-146b    | 25 | UGAGAACUGAAUCCAUAGGCU     | GAGAAC  |
| hsa-miR-146a    | 25 | UGAGAACUGAAUCCAUAGGCU     | GAGAAC  |
| hsa-miR-140     | 25 | CAGUGGUUUUACCCUAUGGUAG    | AGUGGU  |
| hsa-let-7g*     | 25 | CUGUACAGGCCACUGCCUUGC     | UGUACA  |
| hsa-miR-582     | 29 | UUACAGUUGUUCAACCAGUUACU   | UACAGU  |
| hsa-miR-181a-2* | 29 | ACCACUGACCGUUGACUGUACC    | CCACUG  |
| hsa-miR-578     | 30 | CUUCUUGUGCUCUAGGAUUGU     | UUCUUG  |
| hsa-miR-297     | 30 | AUGUAUGUGUGCAUGUGCAUG     | UGUAUG  |
| hsa-miR-223*    | 30 | CGUGUAUUUGACAAGCUGAGUU    | GUGUAU  |
| hsa-miR-194*    | 30 | CCAGUGGGGCGUCUGUUAUCUG    | CAGUGG  |
| hsa-miR-132*    | 30 | ACCGUGGCUUUCGAUUGUUACU    | CCGUGG  |
| hsa-miR-573     | 31 | CUGAAGUGAUGUGUAACUGAUCAG  | UGAAGU  |
| hsa-miR-450     | 31 | UUUUGCGAUGUGUCCUAAUUAU    | UUUGCG  |
| hsa-miR-380-5p  | 31 | UGGUUGACCAUAGAACAUGCGC    | GGUUGA  |
| hsa-miR-558     | 32 | UGAGCUGCUGUACCAAAAU       | GAGCUG  |
| hsa-miR-299-5p  | 32 | UGGUUUACCGUCCACAUAUACU    | GGUUUA  |

|                 |    |                         |        |
|-----------------|----|-------------------------|--------|
| hsa-miR-552     | 33 | AACAGGUGACUGGUUAGACAA   | ACAGGU |
| hsa-miR-542-3p  | 33 | UGUGACAGAUUGAUAAACUGAAA | GUGACA |
| hsa-miR-512-3p  | 33 | AAGUGCUGUCAUAGCUGAGGUC  | AGUGCU |
| hsa-miR-497     | 33 | CAGCAGCACACUGUGGUUUGU   | AGCAGC |
| hsa-miR-191     | 33 | CAACGGAAUCCCAAAGCAGCUG  | AACGGA |
| hsa-miR-138     | 33 | AGCUGGUGUUGUGAAUCAGGCCG | GCUGGU |
| hsa-miR-550     | 34 | UGUCUUACUCCUCAGGCACAU   | GUCUUA |
| hsa-miR-541     | 34 | UGGUGGGCACAGAAUCUGGACU  | GGUGGG |
| hsa-miR-526b    | 34 | CUCUUGAGGGAAGCACUUUCUGU | UCUUGA |
| hsa-miR-323-5p  | 34 | AGGUGGUCCGUGGCGCGUUCGC  | GGUGGU |
| hsa-miR-525     | 36 | CUCCAGAGGGAUGCACUUUCU   | UCCAGA |
| hsa-miR-193b    | 36 | AACUGGCCCUCAAAGUCCCGCU  | ACUGGC |
| hsa-miR-520a*   | 39 | CUCCAGAGGGAAGUACUUUCU   | UCCAGA |
| hsa-miR-181c    | 39 | AACAUUCAACCUUGUCGGUGAGU | ACAUUC |
| hsa-miR-519b-5p | 41 | CUCUAGAGGGAAGCGCUUUCUG  | UCUAGA |
| hsa-let-7f      | 41 | UGAGGUAGUAGAUUGUAUAGUU  | GAGGUA |
| hsa-miR-513     | 43 | UUCACAGGGAGGUGUCAU      | UCACAG |
| hsa-miR-489     | 43 | GUGACAUCAUAUACGGCAGC    | UGACAU |
| hsa-miR-450b-3p | 43 | UUGGGAUCAUUUUGCAUCCAUA  | UGGGAU |
| hsa-miR-346     | 43 | UGUCUGCCCGCAUGCCUGCCUCU | GUCUGC |
| hsa-miR-18b*    | 43 | UGCCCUAAAUGCCCUUCUGGC   | GCCCUA |
| hsa-let-7e*     | 43 | CUAUACGGCCUCCUAGCUUCC   | UAUACG |
| hsa-miR-509-5p  | 44 | UACUGCAGACAGUGGCAAUCA   | ACUGCA |
| hsa-miR-328     | 44 | CUGGCCCUUCUCUGCCCUUCCGU | UGGCC  |
| hsa-miR-136*    | 44 | CAUCAUCGUCUAAAUGAGUCU   | AUCAUC |
| hsa-miR-135b*   | 44 | AUGUAGGGCUAAAAGCCAUGGG  | UGUAGG |
| hsa-miR-130a*   | 44 | UUCACAUUGUGCUACUGUCUGC  | UCACAU |
| hsa-miR-509-3p  | 45 | UGAUUGGUACGUCUGUGGGUAG  | GAUUGG |
| hsa-miR-509     | 45 | UGAUUGGUACGUCUGUGGGUAG  | GAUUGG |
| hsa-miR-26a     | 45 | UUCAAGUAAUCCAGGAUAGGCU  | UCAAGU |
| hsa-miR-502     | 46 | AUCCUUGCUAUCUGGGUGCUA   | UCCUUG |
| hsa-miR-141*    | 46 | CAUCUUCAGUACAGUGUUGGA   | AUCUUC |
| hsa-miR-449b    | 48 | AGGCAGUGUAUUGUUAGCUGGC  | GGCAGU |
| hsa-miR-30b*    | 48 | CUGGGAGGUGGAUGUUUACUUC  | UGGGAG |
| hsa-miR-326     | 54 | CCUCUGGGCCCUUCCUCCAG    | CUCUGG |
| hsa-miR-218-1*  | 54 | AUGGUUCCGUCAAGCACCAUGG  | UGGUUC |

**Number of miRNAs**    **Number of groups**  
151                            31

$\tau_B = 0.05$  and  $\tau_p = 0.0459$

| miRNA          | SICORE group | mature sequence           | seed sequence |
|----------------|--------------|---------------------------|---------------|
| hsa-miR-99b    | 1            | CACCCGUAGAACCGACCUUGCG    | ACCCGU        |
| hsa-miR-99a    | 1            | AACCCGUAGAUCCGAUCUUGUG    | ACCCGU        |
| hsa-miR-767-3p | 1            | UCUGCUCAUACCCCAUGGUUUCU   | CUGCUC        |
| hsa-miR-616    | 1            | AGUCAUUGGAGGGUUUGAGCAG    | GUCAUU        |
| hsa-miR-517c   | 1            | AUCGUGCAUCCUUUUAGAGUGU    | UCGUGC        |
| hsa-miR-517b   | 1            | UCGUGCAUCCUUUUAGAGUGUU    | CGUGCA        |
| hsa-miR-517a   | 1            | AUCGUGCAUCCUUUUAGAGUGU    | UCGUGC        |
| hsa-miR-515-5p | 1            | UUCUCCAAAAGAAAGCACUUUCUG  | UCUCCA        |
| hsa-miR-34c-3p | 1            | AAUCACUAACCACACGGCCAGG    | AUCACU        |
| hsa-miR-150*   | 1            | CUGGUACAGGCCUGGGGGACAG    | UGGUAC        |
| hsa-miR-127    | 1            | UCGGAUCCGUCUGAGCUUGGCU    | CGGAUC        |
| hsa-miR-100    | 1            | AACCCGUAGAUCCGAACUUGUG    | ACCCGU        |
| hsa-miR-99a*   | 2            | CAAGCUCGCUUCUAUGGGUCUG    | AAGCUC        |
| hsa-miR-922    | 2            | GCAGCAGAGAAUAGGACUACGUC   | CAGCAG        |
| hsa-miR-802    | 2            | CAGUAACAAAGAUUCAUCCUUGU   | AGUAAC        |
| hsa-miR-632    | 2            | GUGUCUGCUUCCUGUGGGA       | UGUCUG        |
| hsa-miR-583    | 2            | CAAAGAGGAAGGUCCAUUAC      | AAAGAG        |
| hsa-miR-507    | 2            | UUUUGCACCUUUUGGAGUGAA     | UUUGCA        |
| hsa-miR-452    | 2            | AACUGUUUGCAGAGGAAACUGA    | ACUGUU        |
| hsa-miR-24     | 2            | UGGCUCAGUUCAGCAGGAACAG    | GGCUCA        |
| hsa-miR-215    | 2            | AUGACCUAUGAAUUGACAGAC     | UGACCU        |
| hsa-miR-214    | 2            | ACAGCAGGCACAGACAGGCAGU    | CAGCAG        |
| hsa-miR-212    | 2            | UAACAGUCUCCAGUCACGGCC     | AACAGU        |
| hsa-miR-19b-1* | 2            | AGUUUUGCAGGUUUGCAUCCAGC   | GUUUUG        |
| hsa-miR-1231   | 2            | GUGUCUGGGCGGACAGCUGC      | UGUCUG        |
| hsa-miR-96     | 3            | UUUGGCACUAGCACAUUUUUGCU   | UUUGCA        |
| hsa-miR-202    | 3            | AGAGGUAUAGGGCAUGGGAA      | GAGGUA        |
| hsa-miR-940    | 5            | AAGGCAGGGCCCCCGCUCCCC     | AGGCAG        |
| hsa-miR-892b   | 5            | CACUGGCUCCUUUCUGGGUAGA    | ACUGGC        |
| hsa-miR-885-3p | 5            | AGGCAGCGGGGUGUAGUGGAUA    | GGCAGC        |
| hsa-miR-877*   | 5            | UCCUCUUCUCCCUCCUCCAG      | CCUCUU        |
| hsa-miR-769-5p | 5            | UGAGACCUCUGGGUUCUGAGCU    | GAGACC        |
| hsa-miR-766    | 5            | ACUCCAGCCCCACAGCCUCAGC    | CUCCAG        |
| hsa-miR-644    | 5            | AGUGUGGCUUUUCUAGAGC       | GUGUGG        |
| hsa-miR-642    | 5            | GUCCCUCUCCAAAUGUGUCUUG    | UCCUC         |
| hsa-miR-640    | 5            | AUGAUCCAGGAACCUGCCUCU     | UGAUCC        |
| hsa-miR-637    | 5            | ACUGGGGGCUUUUCGGGCUCUGCGU | CUGGGG        |
| hsa-miR-634    | 5            | AACCAGCACCCCAACUUUGGAC    | ACCAGC        |
| hsa-miR-631    | 5            | AGACCUGGCCCCAGACCUCAGC    | GACCUG        |
| hsa-miR-629*   | 5            | GUUCUCCCAACGUAAGCCCAGC    | UUCUCC        |
| hsa-miR-624*   | 5            | UAGUACCAGUACCUUGUGUUCA    | AGUACC        |
| hsa-miR-624    | 5            | CACAAGGUAUUGGUUUUACCU     | ACAAGG        |
| hsa-miR-608    | 5            | AGGGGUGGUGUUGGGACAGCUCCGU | GGGGUG        |
| hsa-miR-582    | 5            | UUACAGUUGUUAACCAGUUACU    | UACAGU        |
| hsa-miR-569    | 5            | AGUUAAUGAAUCCUGGAAAGU     | GUUAAU        |
| hsa-miR-566    | 5            | GGGCGCCUGUGAUCCCAAC       | GGCGCC        |
| hsa-miR-562    | 5            | AAAGUAGCUGUACCAUUUGC      | AAGUAG        |
| hsa-miR-558    | 5            | UGAGCUGCUGUACCAAAAU       | GAGCUG        |
| hsa-miR-555    | 5            | AGGGUAAGCUGAACCUCUGAU     | GGGUAA        |
| hsa-miR-548d   | 5            | CAAAAACCACAGUUUCUUUUGC    | AAAAAC        |
| hsa-miR-542-3p | 5            | UGUGACAGAUUGAUAAACUGAAA   | GUGACA        |
| hsa-miR-541    | 5            | UGGUGGGCACAGAAUCUGGACU    | GGUGGG        |
| hsa-miR-532    | 5            | CAUGCCUUGAGUGUAGGACCGU    | AUGCCU        |

|                 |   |                          |        |
|-----------------|---|--------------------------|--------|
| hsa-miR-525     | 5 | CUCCAGAGGGAUGCACUUUCU    | UCCAGA |
| hsa-miR-524*    | 5 | CUACAAAGGGAAGCACUUUCUC   | UACAAA |
| hsa-miR-520e    | 5 | AAAGUGCUUCCUUUUUGAGGG    | AAGUGC |
| hsa-miR-520d    | 5 | AAAGUGCUUCUCUUUGGUGGGU   | AAGUGC |
| hsa-miR-520c    | 5 | AAAGUGCUUCCUUUUAGAGGGU   | AAGUGC |
| hsa-miR-520b    | 5 | AAAGUGCUUCCUUUUAGAGGG    | AAGUGC |
| hsa-miR-520a*   | 5 | CUCCAGAGGGAAGUACUUUCU    | UCCAGA |
| hsa-miR-520a    | 5 | AAAGUGCUUCCUUUGGACUGU    | AAGUGC |
| hsa-miR-519b-5p | 5 | CUCUAGAGGGAAGCGCUUUCUG   | UCUAGA |
| hsa-miR-519b    | 5 | AAAGUGCAUCCUUUUAGAGGUU   | AAGUGC |
| hsa-miR-519a*   | 5 | CUCUAGAGGGAAGCGCUUUCUG   | UCUAGA |
| hsa-miR-519a    | 5 | AAAGUGCAUCCUUUUAGAGUGU   | AAGUGC |
| hsa-miR-518e*   | 5 | CUCUAGAGGGAAGCGCUUUCUG   | UCUAGA |
| hsa-miR-518a-5p | 5 | CUGCAAAGGGAAGCCUUUC      | UGCAAA |
| hsa-miR-511     | 5 | GUGUCUUUUGCUCUGCAGUCA    | UGUCUU |
| hsa-miR-509-3p  | 5 | UGAUUGGUACGUCUGUGGGUAG   | GAUUGG |
| hsa-miR-509     | 5 | UGAUUGGUACGUCUGUGGGUAG   | GAUUGG |
| hsa-miR-499-3p  | 5 | ACAUCACAGCAAGUCUGUGCU    | ACAUCA |
| hsa-miR-486     | 5 | UCCUGUACUGAGCUGCCCCGAG   | CCUGUA |
| hsa-miR-449b    | 5 | AGGCAGUGUAUUGUUAGCUGGC   | GGCAGU |
| hsa-miR-449     | 5 | UGGCAGUGUAUUGUUAGCUGGU   | GGCAGU |
| hsa-miR-433     | 5 | AUCAUGAUGGGCUCCUCGGUGU   | UCAUGA |
| hsa-miR-372     | 5 | AAAGUGCUGCGACAUUUGAGCGU  | AAGUGC |
| hsa-miR-34b*    | 5 | UAGGCAGUGUCAUUAGCUGAUUG  | AGGCAG |
| hsa-miR-34a*    | 5 | CAAUCAGCAAGUAUACUGCCCU   | AAUCAG |
| hsa-miR-34a     | 5 | UGGCAGUGUCUUAGCUGGUUGU   | GGCAGU |
| hsa-miR-346     | 5 | UGUCUGCCCCGCAUGCCUGCCUCU | GUCUGC |
| hsa-miR-342-5p  | 5 | AGGGGUGCUAUCUGUGAUUGA    | GGGGUG |
| hsa-miR-338     | 5 | UCCAGCAUCAGUGAUUUUGUUG   | CCAGCA |
| hsa-miR-329     | 5 | AACACACCUGGUUAACCUCUUU   | ACACAC |
| hsa-miR-326     | 5 | CCUCUGGGCCCUUCCUCCAG     | CUCUGG |
| hsa-miR-323-5p  | 5 | AGGUGGUCCGUGGCGGUUCGC    | GGUGGU |
| hsa-miR-323     | 5 | CACAUUACACGGUCGACCUCU    | ACAUUA |
| hsa-miR-31      | 5 | AGGCAAGAUGCUGGCAUAGCU    | GGCAAG |
| hsa-miR-30b*    | 5 | CUGGGAGGUGGAUGUUUACUUC   | UGGGAG |
| hsa-miR-302a    | 5 | UAAGUGCUUCCAUGUUUUGGUGA  | AAGUGC |
| hsa-miR-299-5p  | 5 | UGGUUUACCGUCCCAUACA      | GGUUUA |
| hsa-miR-26a     | 5 | UUCAAGUAAUCCAGGAUAGGCU   | UCAAGU |
| hsa-miR-218-1*  | 5 | AUGGUUCCGUCAAGCACCAUGG   | UGGUUC |
| hsa-miR-208b    | 5 | AUAAGACGAACAAAAGGUUUGU   | UAAGAC |
| hsa-miR-199b-3p | 5 | ACAGUAGUCUGCACAUUGGUUA   | CAGUAG |
| hsa-miR-193b    | 5 | AACUGGCCCUCAAAGUCCCGCU   | ACUGGC |
| hsa-miR-193a    | 5 | AACUGGCCUACAAAGUCCAGU    | ACUGGC |
| hsa-miR-18b     | 5 | UAAGGUGCAUCUAGUGCAGUUAG  | AAGGUG |
| hsa-miR-181c    | 5 | AACAUUCAACCGUCGGUGAGU    | ACAUUC |
| hsa-miR-17-3p   | 5 | ACUGCAGUGAAGGCACUUGUAG   | CUGCAG |
| hsa-miR-16      | 5 | UAGCAGCACGUAAAUAUUGGCG   | AGCAGC |
| hsa-miR-155     | 5 | UUAAUGCUAUUCGUGAUAGGGGU  | UAAUGC |
| hsa-miR-151     | 5 | CUAGACUGAAGCUCCUUGAGG    | UAGACU |
| hsa-miR-148a    | 5 | UCAGUGCACUACAGAACUUUGU   | CAGUGC |
| hsa-miR-147     | 5 | GUGUGUGGAAAUGCUCUCUGC    | UGUGUG |
| hsa-miR-145*    | 5 | GGAUUCCUGGAAAUCUGUUCU    | GAUUCC |
| hsa-miR-144*    | 5 | GGAUUAUCAUCAUACUGUAAG    | GAUAUC |
| hsa-miR-138-2*  | 5 | GCUAUUUCACGACACCAGGGUU   | CUAUUU |
| hsa-miR-137     | 5 | UUAUUGCUAAGAAUACGCGUAG   | UAUUGC |
| hsa-miR-132     | 5 | UAACAGUCUACAGCCAUGGUCG   | AACAGU |

|                  |    |                              |        |
|------------------|----|------------------------------|--------|
| hsa-miR-126      | 5  | UCGUACCGUGAGUAAUAAUGCG       | CGUACC |
| hsa-miR-105*     | 5  | ACGGAUGUUUGAGCAUGUGCUA       | CGGAUG |
| hsa-let-7i*      | 5  | CUGCGCAAGCUACUGCCUUGCU       | UGCGCA |
| hsa-let-7g*      | 5  | CUGUACAGGCCACUGCCUUGC        | UGUACA |
| hsa-let-7f-2*    | 5  | CUAUACAGUCUACUGUCUUUCC       | UAUACA |
| hsa-let-7f-1*    | 5  | CUAUACAAUCUAUUGCCUUCCC       | UAUACA |
| hsa-let-7c*      | 5  | UAGAGUUACACCCUGGGAGUUA       | AGAGUU |
| hsa-let-7f       | 5  | UGAGGUAGUAGAUUGUAUAGUU       | GAGGUA |
| hsa-miR-938      | 6  | UGCCCUUAAAGGUGAACCCAGU       | GCCCUU |
| hsa-miR-765      | 6  | UGGAGGAGAAGGAAGGUGAUG        | GGAGGA |
| hsa-miR-610      | 6  | UGAGCUAAAUGUGUGCUGGGA        | GAGCUA |
| hsa-miR-521      | 6  | AACGCACUCCCUUUAGAGUGU        | ACGCAC |
| hsa-miR-455      | 6  | UAUGUGCCUUUGGACUACAUCG       | AUGUGC |
| hsa-miR-340*     | 6  | UCCGUCUCAGUUACUUUAUAGC       | CCGUCU |
| hsa-miR-196a*    | 6  | CGGCAACAAGAAACUGCCUGAG       | GGCAAC |
| hsa-miR-18a      | 6  | UAAGGUGCAUCUAGUGCAGAUAG      | AAGGUG |
| hsa-miR-936      | 7  | ACAGUAGAGGGAGGAAUCGCAG       | CAGUAG |
| hsa-miR-935      | 7  | CCAGUUACCGCUUCCGCUACCGC      | CAGUUA |
| hsa-miR-876-5p   | 7  | UGGAUUUCUUUGUGAAUCACCA       | GGAUUU |
| hsa-miR-768-3p   | 7  | UCACAAUGCUGACACUCAAACUGCUGAC | CACAAU |
| hsa-miR-621      | 7  | GGUAGCAACAGCGCUUACCU         | GCUAGC |
| hsa-miR-584      | 7  | UUAUGUUUGCCUGGGACUGAG        | UAUGGU |
| hsa-miR-520g     | 7  | CAAAGUGCUUCCCUUUAGAGUGU      | CAAAGU |
| hsa-miR-518c*    | 7  | UCUCUGGAGGGAAGCACUUUCUG      | CUCUGG |
| hsa-miR-330-5p   | 7  | UCUCUGGGCCUGUGUCUUAGGC       | CUCUGG |
| hsa-miR-1226     | 7  | UCACCAGCCCUGUGUCCCUAG        | CACCAG |
| hsa-miR-106b     | 7  | UAAAGUGCUGACAGUGCAGAU        | AAAGUG |
| hsa-miR-93       | 8  | CAAAGUGCUGUUCGUGCAGGUAG      | AAAGUG |
| hsa-miR-888      | 8  | UACUCAAAAAGCUGUCAGUCA        | ACUCAA |
| hsa-miR-491-3p   | 8  | CUUAUGCAAGAUUCCCUUCUAC       | UUAUGC |
| hsa-miR-490      | 8  | CAACCUGGAGGACUCCAUGCUG       | AACCUG |
| hsa-miR-219-1-3p | 8  | AGAGUUGAGUCUGGACGUCCCG       | GAGUUG |
| hsa-miR-155*     | 8  | CUCCUACAUAUUAGCAUUAACA       | UCCUAC |
| hsa-miR-1228     | 8  | UCACACCUGCCUCGCCCCCC         | CACACC |
| hsa-miR-92b      | 9  | UAUUGCACUCGUCCCGGCCUCC       | AUUGCA |
| hsa-miR-575      | 9  | GAGCCAGUUGGACAGGAGC          | AGCCAG |
| hsa-miR-545      | 9  | UCAGCAAACAUUUUAUUGUGUC       | CAGCAA |
| hsa-miR-520h     | 9  | CAAAGUGCUUCCCUUUAGAGU        | CAAAGU |
| hsa-miR-520c-5p  | 9  | CUCUAGAGGGAAGCACUUUCUG       | UCUAGA |
| hsa-miR-924      | 10 | AGAGUCUUGUGAUGUCUUGC         | GAGUCU |
| hsa-miR-760      | 10 | CGGCUCUGGGUCUGUGGGGA         | GGCUCU |
| hsa-miR-627      | 10 | GUGAGUCUCUAAGAAAAGAGGA       | UGAGUC |
| hsa-miR-429      | 10 | UAAUACUGUCUGGUAAAACCGU       | AAUACU |
| hsa-miR-378      | 10 | CUCCUGACUCCAGGUCCUGUGU       | UCCUGA |
| hsa-miR-33b*     | 10 | CAGUGCCUCGGCAGUGCAGCCC       | AGUGCC |
| hsa-miR-331      | 10 | GCCCCUGGGCCUAUCCUAGAA        | CCCCUG |
| hsa-miR-211      | 10 | UUCCCUUUGUCAUCCUUCGCCU       | UCCCUU |
| hsa-miR-921      | 11 | CUAGUGAGGGACAGAACCAGGAUUC    | UAGUGA |
| hsa-miR-554      | 11 | GCUAGUCCUGACUCAGCCAGU        | CUAGUC |
| hsa-miR-376a     | 11 | AUCAUAGAGGAAAUCCACGU         | UCAUAG |
| hsa-miR-369-5p   | 11 | AGAUCGACCGUGUUUAUUCGC        | GAUCGA |
| hsa-miR-103      | 11 | AGCAGCAUUGUACAGGGCUAUGA      | GCAGCA |
| hsa-miR-9        | 12 | UCUUUGGUUAUCUAGCUGUAUGA      | CUUUGG |
| hsa-miR-502      | 12 | AUCCUUGCUAUCUGGGUGCUA        | UCCUUG |
| hsa-miR-141*     | 12 | CAUCUCCAGUACAGUGUUGGA        | AUCUUC |
| hsa-miR-133b     | 12 | UUUGGUCCCCUUAACCAGCUA        | UUGGUC |

|                 |    |                            |        |
|-----------------|----|----------------------------|--------|
| hsa-miR-892a    | 13 | CACUGUGUCCUUUCUGCGUAG      | ACUGUG |
| hsa-miR-28-3p   | 13 | CACUAGAUUGUGAGCUCCUGGA     | ACUAGA |
| hsa-miR-199a    | 13 | CCCAGUGUUCAGACUACCUGUUC    | CCAGUG |
| hsa-miR-181a    | 13 | AACAUUCAACGCUGUCGGUGAGU    | ACAUUC |
| hsa-miR-148a*   | 13 | AAAGUUCUGAGACACUCCGACU     | AAGUUC |
| hsa-miR-106b*   | 13 | CCGCACUGUGGGUACUUGCUGC     | CGCACU |
| hsa-let-7a*     | 13 | CUAUACAAUCUACUGUCUUUC      | UAUACA |
| hsa-miR-889     | 15 | UUAUAUUCGGACAACCAUUGU      | UAAUAU |
| hsa-miR-502-3p  | 15 | AAUGCACCUGGGCAAGGAUUCA     | AUGCAC |
| hsa-miR-487     | 15 | AAUCAUACAGGGACAUCAGUU      | AUCAUA |
| hsa-miR-32      | 15 | UAUUGCACAUUACUAAGUUGCA     | AUUGCA |
| hsa-miR-224     | 15 | CAAGUCACUAGUGGUUCCGUU      | AAGUCA |
| hsa-miR-197     | 15 | UUCACCACCUUCUCCACCCAGC     | UCACCA |
| hsa-miR-181a-2* | 15 | ACCACUGACCGUUGACUGUACC     | CCACUG |
| hsa-miR-888*    | 16 | GACUGACACCUCUUUGGGUGAA     | ACUGAC |
| hsa-miR-551b    | 16 | GCGACCCAUACUUGGUUUUCAG     | CGACCC |
| hsa-miR-526b*   | 16 | GAAAGUGCUUCCUUUUAGAGGC     | AAAGUG |
| hsa-miR-526b    | 16 | CUCUUGAGGGAAGCACUUUCUGU    | UCUUGA |
| hsa-miR-886-3p  | 17 | CGCGGGUGCUUACUGACCCUU      | GCGGGU |
| hsa-miR-626     | 17 | AGCUGUCUGAAAAUGUCUU        | GCUGUC |
| hsa-miR-579     | 17 | UUCAUUUGGUUAUAACCGCGAUU    | UCAUUU |
| hsa-miR-574     | 17 | CACGCUCAUGCACACACCCACA     | ACGCUC |
| hsa-miR-493     | 17 | UUGUACAUGGUAGGCUUUCAUU     | UGUACA |
| hsa-miR-206     | 17 | UGGAAUGUAAGGAAGUGUGUGG     | GGAAUG |
| hsa-miR-193a-5p | 17 | UGGGUCUUUGCGGGCGAGAUGA     | GGGUCU |
| hsa-miR-146b    | 17 | UGAGAACUGAAUJCCAUGGGCU     | GAGAAC |
| hsa-miR-146a    | 17 | UGAGAACUGAAUJCCAUGGGUU     | GAGAAC |
| hsa-miR-140     | 17 | CAGUGGUUUUACCCUAUGGUAG     | AGUGGU |
| hsa-miR-135a    | 17 | UAUGGCUUUUUAUUCUAUGUGA     | AUGGCU |
| hsa-miR-876-3p  | 18 | UGGUGGUUUACAAGUAAUUCA      | GGUGGU |
| hsa-miR-619     | 18 | GACCUGGACAUGUUUGGCCAGU     | ACCUGG |
| hsa-miR-452*    | 18 | CUCAUCUGCAAAGAAGUAAGUG     | UCAUCU |
| hsa-miR-450b-3p | 18 | UUGGGAUCAUUUUGCAUCCAUA     | UGGGAU |
| hsa-miR-18b*    | 18 | UGCCCUAAAUGCCCUUCUGGC      | GCCCUA |
| hsa-miR-128     | 18 | UCACAGUGAACC GGUCUCUUU     | CACAGU |
| hsa-let-7e*     | 18 | CUAUACGGCCUCCUAGCUUUC      | UAUACG |
| hsa-miR-874     | 19 | CUGCCUUGGCCCGAGGGACCGA     | UGCCCU |
| hsa-miR-665     | 19 | ACCAGGAGGCUGAGGCCCCU       | CCAGGA |
| hsa-miR-648     | 19 | AAGUGUGCAGGGCACUGGU        | AGUGUG |
| hsa-miR-612     | 19 | GCUGGGCAGGGCUUCUGAGCUCCUU  | CUGGGC |
| hsa-miR-532-3p  | 19 | CCUCCACACCCAAGGCUUGCA      | CUCCCA |
| hsa-miR-516-5p  | 19 | AUCUGGAGGUAAGAAGCACUUU     | UCUGGA |
| hsa-miR-376a*   | 19 | GUAGAUUCUCCUUCUAUGAGUA     | UAGAUU |
| hsa-miR-29c     | 19 | UAGCACCAUUUGAAAUCGGUUA     | AGCACC |
| hsa-miR-29a     | 19 | UAGCACCAUCUGAAAUCGGUUA     | AGCACC |
| hsa-miR-298     | 19 | AGCAGAAGCAGGGAGGUUCUCCCA   | GCAGAA |
| hsa-miR-222     | 19 | AGCUACAUCUGGCUACUGGGU      | GCUACA |
| hsa-miR-221     | 19 | AGCUACAUUGUCUGCUGGGUUUC    | GCUACA |
| hsa-miR-21*     | 19 | CAACACCAGUCGAUGGGCUGU      | AACACC |
| hsa-miR-202*    | 19 | UUCCUAUGCAUAUACUUCUUUG     | UCCUAU |
| hsa-miR-15a*    | 19 | CAGGCCAUUUGUGCUGCCUCA      | AGGCCA |
| hsa-miR-138-1*  | 19 | GCUACUUCACAACACCAGGGCC     | CUACUU |
| hsa-miR-768-5p  | 20 | GUUGGAGGAUGAAAGUACGGAGUGAU | UUGGAG |
| hsa-miR-516-3p  | 20 | UGC UCCUUUCAGAGGGU         | GCUUCC |
| hsa-miR-373     | 20 | GAAGUGCUUCGAUUUUGGGGUGU    | AAGUGC |

|                  |    |                           |        |
|------------------|----|---------------------------|--------|
| hsa-miR-302d     | 20 | UAAGUGCUUCCAUGUUUGAGUGU   | AAGUGC |
| hsa-miR-101      | 20 | UACAGUACUGUGAUAAACUGAA    | ACAGUA |
| hsa-miR-744*     | 21 | CUGUUGCCACUAACCUCAACCU    | UGUUGC |
| hsa-miR-582-3p   | 21 | UAACUGGUUGAACAAACUGAAC    | AACUGG |
| hsa-miR-556-3p   | 21 | AUAUUACCAUUAGCUCUUCUUU    | UAUUAC |
| hsa-miR-519e     | 21 | AAGUGCCUCCUUUUAGAGUGUU    | AGUGCC |
| hsa-miR-371      | 21 | AAGUGCCGCCAUCUUUUAGAGUGU  | AGUGCC |
| hsa-miR-30e-3p   | 21 | CUUUCAGUCGGAUGUUUACAGC    | UUUCAG |
| hsa-miR-25       | 21 | CAUUGCACUUGUCUCGGUCUGA    | AUUGCA |
| hsa-miR-19b      | 21 | UGUGCAAUCCAUGCAAAACUGA    | GUGCAA |
| hsa-miR-188      | 21 | CAUCCCUUGCAUGGGUGGAGGG    | AUCCCU |
| hsa-miR-1227     | 21 | CGUGCCACCCUUUUCCCCAG      | GUGCCA |
| hsa-miR-744      | 22 | UGCGGGGCUAGGGCUAACAGCA    | GCGGGG |
| hsa-miR-552      | 22 | AACAGGUGACUGGUUAGACAA     | ACAGGU |
| hsa-miR-297      | 22 | AUGUAUGUGUGCAUGUGCAUG     | UGUAUG |
| hsa-miR-671-3p   | 24 | UCCGGUUCUCAGGGCUCCACC     | CCGGUU |
| hsa-miR-636      | 24 | UGUGCUUGCUCGUCCCGCCCGCA   | GUGCUU |
| hsa-miR-495      | 24 | AAACAAACAUGGUGCACUUCUU    | AACAAA |
| hsa-miR-431*     | 24 | CAGGUCGUCUUGCAGGGCUUCU    | AGGUCG |
| hsa-miR-27a*     | 24 | AGGGCUUAGCUGCUUGUGAGCA    | GGGCUU |
| hsa-miR-222*     | 24 | CUCAGUAGCCAGUGUAGAUCU     | UCAGUA |
| hsa-miR-196b     | 24 | UAGGUAGUUCCUGUUGUUGGG     | AGGUAG |
| hsa-miR-185      | 24 | UGGAGAGAAAGGCAGUUCUGA     | GGAGAG |
| hsa-miR-129-3p   | 24 | AAGCCCUUACCCCAAAAAGCAU    | AGCCCU |
| hsa-miR-122a     | 24 | UGGAGUGUGACAAUGGUGUUUG    | GGAGUG |
| hsa-miR-671      | 25 | AGGAAGCCUGGAGGGGCUGGAG    | GGAAGC |
| hsa-miR-650      | 25 | AGGAGGCAGCGCUCUCAGGAC     | GGAGGC |
| hsa-miR-625      | 25 | AGGGGGAAGUUCUAUAGUCC      | GGGGGA |
| hsa-miR-564      | 25 | AGGCACGGUGUCAGCAGGC       | GGCACG |
| hsa-miR-485-5p   | 25 | AGAGGCUGGCCGUGAUGAAUUC    | GAGGCU |
| hsa-miR-187      | 25 | UCGUGUCUUGUGUUGCAGCCGG    | CGUGUC |
| hsa-miR-184      | 25 | UGGACGGAGAACUGAUAAGGGU    | GGACGG |
| hsa-miR-151-5p   | 25 | UCGAGGAGCUCACAGUCUAGU     | CGAGGA |
| hsa-miR-661      | 26 | UGCCUGGGUCUCUGGCCUGCGCGU  | GCCUGG |
| hsa-miR-520d*    | 26 | CUACAAAGGGAAGCCCUUUC      | UACAAA |
| hsa-miR-635      | 28 | ACUUGGGCACUGAAACAAUGUCC   | CUUGGG |
| hsa-miR-588      | 28 | UUGGCCACAAUGGGUUAGAAC     | UGGCCA |
| hsa-miR-628-5p   | 29 | AUGCUGACAUUUUACUAGAGG     | UGCUGA |
| hsa-miR-527      | 29 | CUGCAAAGGGAAGCCCUUUC      | UGCAAA |
| hsa-miR-425      | 29 | AUCGGGAAUGUCGUGUCCGCC     | UCGGGA |
| hsa-miR-34c      | 29 | AGGCAGUGUAGUUAGCUGAUUGC   | GGCAGU |
| hsa-miR-198      | 29 | GGUCCAGAGGGGAGAUAGGUUC    | GUCCAG |
| hsa-miR-149*     | 29 | AGGGAGGGACGGGGGCUGUGC     | GGGAGG |
| hsa-miR-623      | 30 | AUCCCUUGCAGGGGCUGUUGGGU   | UCCCUU |
| hsa-miR-187*     | 30 | GGCUACAACACAGGACCCGGGC    | GCUACA |
| hsa-miR-605      | 33 | UAAAUCCCAUGGUGCCUUCUCCU   | AAAUCC |
| hsa-miR-601      | 33 | UGGUCUAGGAUUGUUGGAGGAG    | GGUCUA |
| hsa-miR-510      | 33 | UACUCAGGAGAGUGGCAAUCAC    | ACUCAG |
| hsa-miR-509-3-5p | 33 | UACUGCAGACGUGGCAAUCAUG    | ACUGCA |
| hsa-miR-361-3p   | 33 | UCCCCCAGGUGUGAUUCUGAUUU   | CCCCCA |
| hsa-miR-328      | 33 | CUGGCCUCUCUGCCCUUCCGU     | UGGCC  |
| hsa-miR-136*     | 33 | CAUCAUCGUCUCAAUGAGUCU     | AUCAUC |
| hsa-miR-135b*    | 33 | AUGUAGGGCUAAAAGCCAUGGG    | UGUAGG |
| hsa-miR-130a*    | 33 | UUCACAUUGUGCUACUGUCUGC    | UCACAU |
| hsa-miR-593*     | 35 | AGGCACCAGCCAGGCAUUGCUCAGC | GGCACC |
| hsa-miR-590      | 35 | GAGCUUAUUCAUAAAAGUGCAG    | AGCUUA |



|                 |    |                         |        |
|-----------------|----|-------------------------|--------|
| hsa-miR-592     | 36 | UUGUGUCAUAUGCGAUGAUGU   | UGUGUC |
| hsa-miR-544     | 36 | AUUCUGCAUUUUUAGCAAGUUC  | UUCUGC |
| hsa-miR-491     | 36 | AGUGGGGAACCCUCCAUGAGG   | GUGGGG |
| hsa-miR-421     | 36 | AUCAACAGACAUAUUUUGGGCGC | UCAACA |
| hsa-miR-127-5p  | 36 | CUGAAGCUCAGAGGGCUCUGAU  | UGAAGC |
| hsa-miR-589     | 37 | UGAGAACCACGUCUCUCUGAG   | GAGAAC |
| hsa-miR-422a    | 37 | ACUGGACUUAGGGUCAGAAGGC  | CUGGAC |
| hsa-miR-223     | 37 | UGUCAGUUUGUCAAAUACCCCA  | GUCAGU |
| hsa-miR-15a     | 37 | UAGCAGCACAUAUUGGUUUGUG  | AGCAGC |
| hsa-miR-581     | 38 | UCUUGUGUUCUCUAGAUCAGU   | CUUGUG |
| hsa-miR-148b*   | 38 | AAGUUCUGUUUAUACACUCAGGC | AGUUCU |
| hsa-miR-567     | 41 | AGUAUGUUCUCCAGGACAGAAC  | GUAUGU |
| hsa-miR-512-5p  | 41 | CACUCAGCCUUGAGGGCACUUUC | ACUCAG |
| hsa-miR-422b    | 41 | ACUGGACUUGGAGUCAGAAGG   | CUGGAC |
| hsa-miR-363*    | 41 | CGGGUGGAUCACGAUGCAAUUU  | GGGUGG |
| hsa-miR-302d*   | 41 | ACUUUAACAUGGAGGCACUUGC  | CUUUAA |
| hsa-miR-223*    | 41 | CGUGUAUUUGACAAGCUGAGUU  | GUGUAU |
| hsa-miR-221*    | 41 | ACCUGGCAUACAUGUAGAUUU   | CCUGGC |
| hsa-miR-200a    | 41 | UAACACUGUCUGGUAACGAUGU  | AACACU |
| hsa-miR-194*    | 41 | CCAGUGGGGCUGCUGUUUUCUG  | CAGUGG |
| hsa-miR-146b-3p | 41 | UGCCCUGUGGACUCAGUUCUGG  | GCCUG  |
| hsa-miR-132*    | 41 | ACCGUGGCUUUCGAUUGUUACU  | CCGUGG |
| hsa-miR-550     | 42 | UGUCUUACUCCUCAGGCACAU   | GUCUUA |
| hsa-miR-522     | 42 | AAAUGGUUCCCUUUAGAGUGU   | AAAUGG |
| hsa-miR-489     | 42 | GUGACAUCACAUAUACGGCAGC  | UGACAU |
| hsa-miR-200c    | 42 | UAUACUGCCGGUAAUGAUGGA   | AAUACU |
| hsa-miR-200b    | 42 | UAUACUGCCUGGUAUGAUGA    | AAUACU |
| hsa-miR-523*    | 44 | CUCUAGAGGGAAGCGCUUUCUG  | UCUAGA |
| hsa-miR-496     | 44 | UGAGUAUUACAUGGCCAAUCUC  | GAGUAU |
| hsa-miR-490-5p  | 44 | CCAUGGAUCUCCAGGUGGGU    | CAUGGA |
| hsa-miR-520f    | 45 | AAGUGCUUCCUUUUAGAGGGUU  | AGUGCU |
| hsa-miR-515-3p  | 45 | GAGUGCCUUCUUUUUGGAGCGUU | AGUGCC |
| hsa-miR-519c    | 46 | AAAGUGCAUCUUUUUAGAGGAU  | AAGUGC |
| hsa-miR-483-5p  | 46 | AAGACGGGAGGAAAGAAGGGAG  | AGACGG |
| hsa-miR-517*    | 47 | CCUCUAGAUGGAAGCACUGUCU  | CUCUAG |
| hsa-miR-15b     | 47 | UAGCAGCACAUCAUGGUUUACA  | AGCAGC |
| hsa-miR-450     | 54 | UUUUGCGAUGUGUCCUAUAU    | UUUGCG |
| hsa-miR-191     | 54 | CAACGGAAUCCCAAAGCAGCUG  | AACGGA |
| hsa-miR-412     | 55 | ACUUCACCUGGUCCACUAGCCGU | CUUCAC |
| hsa-miR-380-5p  | 55 | UGGUUGACCAUAGAACAUGCGC  | GGUUGA |
| hsa-miR-365     | 56 | UAAUGCCCCUAAAAUCCUUAU   | AAUGCC |
| hsa-miR-26a-2*  | 56 | CCUAUUCUUGAUUACUUGUUUC  | CUAUUC |
| hsa-miR-342     | 57 | UCUCACACAGAAAUCGCACCCGU | CUCACA |
| hsa-miR-192     | 57 | CUGACCUAUGAAUUGACAGCC   | UGACCU |
| hsa-miR-154     | 69 | UAGGUUAUCCGUGUUGCCUUCG  | AGGUUA |
| hsa-miR-147b    | 69 | GUGUGCGGAAUAGCUUCUGCUA  | UGUGCG |

**Number of miRNAs**    **Number of groups**  
322                            42

$$\tau_B = 0.1 \text{ and } \tau_p = 0.0440$$

| miRNA          | SICORE group | mature sequence            | seed sequence |
|----------------|--------------|----------------------------|---------------|
| hsa-miR-99b*   | 1            | CAAGCUCGUGUCUGUGGGUCCG     | AAGCUC        |
| hsa-miR-99a*   | 1            | CAAGCUCGCUUCUAUGGGUCUG     | AAGCUC        |
| hsa-miR-802    | 1            | CAGUAAACAAAGAUUCAUCCUUGU   | AGUAAC        |
| hsa-miR-632    | 1            | GUGUCUGCUUCCUGUGGGA        | UGUCUG        |
| hsa-miR-583    | 1            | CAAAGAGGAAGGUCCCAUAC       | AAAGAG        |
| hsa-miR-522*   | 1            | CUCUAGAGGGAAGCGCUUUCUG     | UCUAGA        |
| hsa-miR-507    | 1            | UUUUGCACCUUUUGGAGUGAA      | UUUGCA        |
| hsa-miR-452    | 1            | AACUGUUUGCAGAGGAAACUGA     | ACUGUU        |
| hsa-miR-24     | 1            | UGGCUCAGUUCAGCAGGAACAG     | GGCUCA        |
| hsa-miR-1238   | 1            | CUUCCUCGUCUGUCUGCCCC       | UUCCUC        |
| hsa-miR-1231   | 1            | GUGUCUGGGCGGACAGCUGC       | UGUCUG        |
| hsa-miR-99b    | 2            | CACCCGUAGAACCAGCCUUGCG     | ACCCGU        |
| hsa-miR-625*   | 2            | GACUAUAGAACUUUCCCCUCA      | ACUAUA        |
| hsa-miR-616    | 2            | AGUCAUUGGAGGGUUUGAGCAG     | GUCAUU        |
| hsa-miR-572    | 2            | GUCCGCUCGGCGGUGGCCCA       | UCCGCU        |
| hsa-miR-517b   | 2            | UCGUGCAUCCUUUAGAGUGUU      | CGUGCA        |
| hsa-miR-150*   | 2            | CUGGUACAGGCCUGGGGACAG      | UGGUAC        |
| hsa-miR-127    | 2            | UCGGAUCCGUCUGAGCUUGGCU     | CGGAUC        |
| hsa-miR-100    | 2            | AACCCGUAGAUCCGAACUUGUG     | ACCCGU        |
| hsa-miR-99a    | 3            | AACCCGUAGAUCCGAUCUUGUG     | ACCCGU        |
| hsa-miR-767-3p | 3            | UCUGCUCAUACCCCAUGGUUUCU    | CUGCUC        |
| hsa-miR-96     | 4            | UUUGGCACUAGCACAUUUUUGCU    | UUGGCA        |
| hsa-miR-942    | 4            | UCUUCUCUGUUUUGGCAUGUG      | CUUCUC        |
| hsa-miR-940    | 4            | AAGGCAGGGCCCCCGCUCCCC      | AGGCAG        |
| hsa-miR-938    | 4            | UGCCCUUAAAGGUGAACCCAGU     | GCCUUU        |
| hsa-miR-934    | 4            | UGUCUACUACUGGAGACACUGG     | GUCUAC        |
| hsa-miR-922    | 4            | GCAGCAGAGAAUAGGACUACGUC    | CAGCAG        |
| hsa-miR-921    | 4            | CUAGUGAGGGACAGAACCAGGAUUC  | UAGUGA        |
| hsa-miR-892b   | 4            | CACUGGCUCCUUUCUGGGUAGA     | ACUGGC        |
| hsa-miR-885-3p | 4            | AGGCAGCGGGGUGUAGUGGAUA     | GGCAGC        |
| hsa-miR-877*   | 4            | UCCUCUUCUCCCUCCUCCAG       | CCUCUU        |
| hsa-miR-769-5p | 4            | UGAGACCUCUGGGUUCUGAGCU     | GAGACC        |
| hsa-miR-768-5p | 4            | GUUGGAGGAUGAAAGUACGGAGUGAU | UUGGAG        |
| hsa-miR-766    | 4            | ACUCCAGCCCCACAGCCUCAGC     | CUCCAG        |
| hsa-miR-744    | 4            | UGCGGGGCUAGGGCUAACAGCA     | GCGGGG        |
| hsa-miR-675    | 4            | UGGUGCGGAGAGGGCCACAGUG     | GGUGCG        |
| hsa-miR-671-3p | 4            | UCCGGUUCUCAGGGCUCCACC      | CCGGUU        |
| hsa-miR-665    | 4            | ACCAGGAGGCUGAGGCCCCU       | CCAGGA        |
| hsa-miR-661    | 4            | UGCCUGGGUCUCUGGCCUGCGGU    | GCCUGG        |
| hsa-miR-646    | 4            | AAGCAGCUGCCUCUGAGGC        | AGCAGC        |
| hsa-miR-644    | 4            | AGUGUGGCUUUCUAGAGC         | GUGUGG        |
| hsa-miR-642    | 4            | GUCCCUCUCCAAAUGUGUCUUG     | UCCUC         |
| hsa-miR-640    | 4            | AUGAUCCAGGAACCUGCCUCU      | UGAUCC        |
| hsa-miR-637    | 4            | ACUGGGGGCUUUCGGGCUCUGCGU   | CUGGGG        |
| hsa-miR-635    | 4            | ACUUGGGCACUGAAACAAUGUCC    | CUUGGG        |
| hsa-miR-634    | 4            | AACCAGCACCCCAACUUUGGAC     | ACCAGC        |
| hsa-miR-631    | 4            | AGACCUGGCCAGACCUCAGC       | GACCUG        |
| hsa-miR-629*   | 4            | GUUCUCCCAACGUAAGCCCAGC     | UUCUCC        |
| hsa-miR-628-5p | 4            | AUGCUGACAUAUUUACUAGAGG     | UGCUGA        |
| hsa-miR-624*   | 4            | UAGUACCAGUACCUUGUGUUCA     | AGUACC        |
| hsa-miR-624    | 4            | CACAAGGUUAUUGGUUUUACCU     | ACAAGG        |
| hsa-miR-622    | 4            | ACAGUCUGCUGAGGUUGGAGC      | CAGUCU        |
| hsa-miR-617    | 4            | AGACUCCCAUUUGAAGGUGGC      | GACUUC        |

|                 |   |                           |        |
|-----------------|---|---------------------------|--------|
| hsa-miR-612     | 4 | GCUGGGCAGGGCUUCUGAGCUCCUU | CUGGGC |
| hsa-miR-601     | 4 | UGGUCUAGGAUUGUUGGAGGAG    | GGUCUA |
| hsa-miR-593*    | 4 | AGGCACCAGCCAGGCAUUGCUCAGC | GGCACC |
| hsa-miR-593     | 4 | UGUCUCUGCUGGGGUUUCU       | GUCUCU |
| hsa-miR-592     | 4 | UUGUGUCAUAUGCGAUGAUGU     | UGUGUC |
| hsa-miR-590     | 4 | GAGCUUAUUCAUAAAAGUGCAG    | AGCUUA |
| hsa-miR-589     | 4 | UGAGAACCACGUCUCUCUGAG     | GAGAAC |
| hsa-miR-588     | 4 | UUGGCCACAAUGGGUUAGAAC     | UGGCCA |
| hsa-miR-582     | 4 | UUACAGUUGUUCAACCAGUUACU   | UACAGU |
| hsa-miR-581     | 4 | UCUUGUGUUCUCUAGAUCAGU     | CUUGUG |
| hsa-miR-575     | 4 | GAGCCAGUUGGACAGGAGC       | AGCCAG |
| hsa-miR-573     | 4 | CUGAAGUGAUGUGUAACUGAUCAG  | UGAAGU |
| hsa-miR-571     | 4 | UGAGUUGGCCAUCUGAGUGAG     | GAGUUG |
| hsa-miR-569     | 4 | AGUUAAGAAUCCUGGAAAGU      | GUUAAU |
| hsa-miR-567     | 4 | AGUAUGUUCUCCAGGACAGAAC    | GUAUGU |
| hsa-miR-566     | 4 | GGGCGCCUGUGAUCCCAAC       | GGCGCC |
| hsa-miR-564     | 4 | AGGCACGGUGUCAGCAGGC       | GGCACG |
| hsa-miR-562     | 4 | AAAGUAGCUGUACCAUUUGC      | AAGUAG |
| hsa-miR-558     | 4 | UGAGCUGCUGUACCAAAAU       | GAGCUG |
| hsa-miR-555     | 4 | AGGGUAAGCUGAACCUCUGAU     | GGGUAA |
| hsa-miR-552     | 4 | AACAGGUGACUGGUUAGACAA     | ACAGGU |
| hsa-miR-551b    | 4 | GCGACCAUACUUGGUUUCAG      | CGACCC |
| hsa-miR-550     | 4 | UGUCUUACUCCUCAGGCACAU     | GUCUUA |
| hsa-miR-548d    | 4 | CAAAAACCACAGUUUCUUUUGC    | AAAAAC |
| hsa-miR-548b-5p | 4 | AAAAGUAAUUGUGGUUUUGGCC    | AAAGUA |
| hsa-miR-545     | 4 | UCAGCAAACAUUUUAUUGUGUC    | CAGCAA |
| hsa-miR-544     | 4 | AUUCUGCAUUUUUAGCAAGUUC    | UUCUGC |
| hsa-miR-542-3p  | 4 | UGUGACAGAUUGAUAACUGAAA    | GUGACA |
| hsa-miR-541     | 4 | UGGUGGGCACAGAAUCUGGACU    | GGUGGG |
| hsa-miR-532-3p  | 4 | CCUCCACACCCAAGGCUUGCA     | CUCCCA |
| hsa-miR-532     | 4 | CAUGCCUUGAGUGUAGGACCGU    | AUGCCU |
| hsa-miR-527     | 4 | CUGCAAAGGGAAGCCCUUUC      | UGCAAA |
| hsa-miR-526b*   | 4 | GAAAGUGCUUCCUUUUAGAGGC    | AAAGUG |
| hsa-miR-526b    | 4 | CUCUUGAGGGAAGCACUUUCUGU   | UCUUGA |
| hsa-miR-525     | 4 | CUCCAGAGGGAUGCACUUUCU     | UCCAGA |
| hsa-miR-523*    | 4 | CUCUAGAGGGAAGCGCUUUCUG    | UCUAGA |
| hsa-miR-522     | 4 | AAAUGGUUCCCUUUAGAGUGU     | AAAUGG |
| hsa-miR-521     | 4 | AACGCACUCCCUUUAGAGUGU     | ACGCAC |
| hsa-miR-520h    | 4 | ACAAAGUGCUUCCCUUUAGAGU    | CAAAGU |
| hsa-miR-520f    | 4 | AAGUGCUUCCUUUUAGAGGGUU    | AGUGCU |
| hsa-miR-520e    | 4 | AAAGUGCUUCCUUUUUGAGGG     | AAGUGC |
| hsa-miR-520d*   | 4 | CUACAAAGGGAAGCCCUUUC      | UACAAA |
| hsa-miR-520d    | 4 | AAAGUGCUUUCUUUGGUGGGU     | AAGUGC |
| hsa-miR-520c    | 4 | AAAGUGCUUCCUUUUAGAGGGU    | AAGUGC |
| hsa-miR-520b    | 4 | AAAGUGCUUCCUUUUAGAGGG     | AAGUGC |
| hsa-miR-520a*   | 4 | CUCCAGAGGGAAGUACUUUCU     | UCCAGA |
| hsa-miR-520a    | 4 | AAAGUGCUUCCCUUUGGACUGU    | AAGUGC |
| hsa-miR-519e    | 4 | AAGUGCCUCCUUUUAGAGUGUU    | AGUGCC |
| hsa-miR-519c    | 4 | AAAGUGCAUCUUUUUAGAGGAU    | AAGUGC |
| hsa-miR-519b-5p | 4 | CUCUAGAGGGAAGCGCUUUCUG    | UCUAGA |
| hsa-miR-519b    | 4 | AAAGUGCAUCCUUUUAGAGGUU    | AAGUGC |
| hsa-miR-519a*   | 4 | CUCUAGAGGGAAGCGCUUUCUG    | UCUAGA |
| hsa-miR-519a    | 4 | AAAGUGCAUCCUUUUAGAGUGU    | AAGUGC |
| hsa-miR-518e*   | 4 | CUCUAGAGGGAAGCGCUUUCUG    | UCUAGA |
| hsa-miR-518a-5p | 4 | CUGCAAAGGGAAGCCCUUUC      | UGCAAA |
| hsa-miR-517c    | 4 | AUCGUGCAUCCUUUUAGAGUGU    | UCGUGC |

|                 |   |                         |        |
|-----------------|---|-------------------------|--------|
| hsa-miR-517a    | 4 | AUCGUGCAUCCCUUUAGAGUGU  | UCGUGC |
| hsa-miR-516-5p  | 4 | AUCUGGAGGUAAGAAGCACUUU  | UCUGGA |
| hsa-miR-516-3p  | 4 | UGC UCCUUUCAGAGGGU      | GCUUCC |
| hsa-miR-515-3p  | 4 | GAGUGCCUUCUUUUGGAGCGUU  | AGUGCC |
| hsa-miR-514     | 4 | AUUGACACUUCUGUGAGUAGA   | UUGACA |
| hsa-miR-513a-3p | 4 | UAAUUUCACCUUUCUGAGAAGG  | AAUUUU |
| hsa-miR-513     | 4 | UUCACAGGGAGGUGUCAU      | UCACAG |
| hsa-miR-512-3p  | 4 | AAGUGCUGUCAUAGCUGAGGUC  | AGUGCU |
| hsa-miR-511     | 4 | GUGUCUUUUGCUCUGCAGUCA   | UGUCUU |
| hsa-miR-509-5p  | 4 | UACUGCAGACAGUGGCAAUCA   | ACUGCA |
| hsa-miR-509-3p  | 4 | UGAUUGGUACGUCUGUGGGUAG  | GAUUGG |
| hsa-miR-509     | 4 | UGAUUGGUACGUCUGUGGGUAG  | GAUUGG |
| hsa-miR-499-3p  | 4 | ACAUCACAGCAAGUCUGUGCU   | ACAUCA |
| hsa-miR-497     | 4 | CAGCAGCACACUGUGUUUGU    | AGCAGC |
| hsa-miR-496     | 4 | UGAGUAUUACAUGGCCAAUCUC  | GAGUAU |
| hsa-miR-493-3p  | 4 | UGAAGGUUCACUGUGUGCCAGG  | GAAGGU |
| hsa-miR-493     | 4 | UUGUACAUGGUAGGCCUUUCAU  | UGUACA |
| hsa-miR-491-3p  | 4 | CUUAUGCAAGAUUCCCUUCUAC  | UUAUGC |
| hsa-miR-491     | 4 | AGUGGGGAACCCUCCAUGAGG   | GUGGGG |
| hsa-miR-490-5p  | 4 | CCAUGGAUCUCCAGGUGGGU    | CAUGGA |
| hsa-miR-489     | 4 | GUGACAUCACAUUACGGCAGC   | UGACAU |
| hsa-miR-486     | 4 | UCCUGUACUGAGCUGCCCCGAG  | CCUGUA |
| hsa-miR-483-5p  | 4 | AAGACGGGAGGAAAGAAGGGAG  | AGACGG |
| hsa-miR-454-3p  | 4 | UAGUGCAUAUUGCUUAUAGGGU  | AGUGCA |
| hsa-miR-453     | 4 | AGGUUGUCCGUGGUGAGUUCGCA | GGUUGU |
| hsa-miR-452*    | 4 | CUCAUCUGCAAAGAAGUAAGUG  | UCAUCU |
| hsa-miR-450     | 4 | UUUUGCGAUGUGUCCUAUAU    | UUUGCG |
| hsa-miR-449b    | 4 | AGGCAGUGUAUUGUUAGCUGGC  | GGCAGU |
| hsa-miR-449     | 4 | UGGCAGUGUAUUGUUAGCUGGU  | GGCAGU |
| hsa-miR-433     | 4 | AUCAUGAUGGGCUCCUCGGUGU  | UCAUGA |
| hsa-miR-422a    | 4 | ACUGGACUUAGGGUCAGAAGGC  | CUGGAC |
| hsa-miR-421     | 4 | AUCAACAGACAUUAAUUGGGCGC | UCAACA |
| hsa-miR-383     | 4 | AGAUCAGAAGGUGAUUGUGGCU  | GAUCAG |
| hsa-miR-376a    | 4 | AUCAUAGAGGAAAUCCACGU    | UCAUAG |
| hsa-miR-374b*   | 4 | CUUAGCAGGUUGUAUUAUCAU   | UUAGCA |
| hsa-miR-373     | 4 | GAAGUGCUCGACAUUUUGGGUGU | AAGUGC |
| hsa-miR-372     | 4 | AAAGUGCUGCGACAUUUAGCGU  | AAGUGC |
| hsa-miR-371     | 4 | AAGUGCCGCCAUUUUUGAGUGU  | AGUGCC |
| hsa-miR-365     | 4 | UAAUGCCCCUAAAAUCCUUAU   | AAUGCC |
| hsa-miR-34c-3p  | 4 | AAUCACUAACCACACGGCCAGG  | AUCACU |
| hsa-miR-34b*    | 4 | UAGGCAGUGUCAUUAGCUGAUUG | AGGCAG |
| hsa-miR-34a*    | 4 | CAAUCAGCAAGUAUACUGCCCU  | AAUCAG |
| hsa-miR-34a     | 4 | UGGCAGUGUCUUAGCUGGUUGU  | GGCAGU |
| hsa-miR-346     | 4 | UGUCUGCCCCGAUGCCUGCCUCU | GUCUGC |
| hsa-miR-342-5p  | 4 | AGGGGUGCUAUCUGUGAUUGA   | GGGGUG |
| hsa-miR-342     | 4 | UCUCACACAGAAAUCGCACCCGU | CUCACA |
| hsa-miR-339-3p  | 4 | UGAGCGCCUCGACGACAGAGCCG | GAGCGC |
| hsa-miR-338     | 4 | UCCAGCAUCAGUGAUUUUGUUG  | CCAGCA |
| hsa-miR-337     | 4 | CUCCUAUAUGAUGCCUUCUUC   | UCCUAU |
| hsa-miR-329     | 4 | AACACACCUUGGUUAACCUCUUU | ACACAC |
| hsa-miR-326     | 4 | CCUCUGGGCCCUUCCUCCAG    | CUCUGG |
| hsa-miR-323-5p  | 4 | AGGUGGUCCGUGGCGCGUUCGC  | GGUGGU |
| hsa-miR-323     | 4 | CACAUUACACGGUCGACCUCU   | ACAUUA |
| hsa-miR-32*     | 4 | CAUUUAGUGUGUGUGAUUUU    | AAUUUA |
| hsa-miR-31      | 4 | AGGCAAGAUGCUGGCAUAGCU   | GGCAAG |
| hsa-miR-30e-3p  | 4 | CUUUCAGUCGGAUGUUUACAGC  | UUUCAG |

|                 |   |                          |        |
|-----------------|---|--------------------------|--------|
| hsa-miR-30b*    | 4 | CUGGGAGGUGGAUGUUUACUUC   | UGGGAG |
| hsa-miR-30b     | 4 | UGUAAACAUCCUACACUCAGCU   | GUAAAC |
| hsa-miR-302a    | 4 | UAAGUGCUUCCAUGUUUUGGUGA  | AAGUGC |
| hsa-miR-29c     | 4 | UAGCACCAUUUGAAAUCGGUUA   | AGCACC |
| hsa-miR-299-5p  | 4 | UGGUUUACCGUCCCACAUACAU   | GGUUUA |
| hsa-miR-299-3p  | 4 | UAUGUGGGAUGGUAAACCGCUU   | AUGUGG |
| hsa-miR-297     | 4 | AUGUAUGUGUGCAUGUGCAUG    | UGUAUG |
| hsa-miR-27a*    | 4 | AGGGCUUAGCUGCUUGUGAGCA   | GGGCUU |
| hsa-miR-26a     | 4 | UUCAAGUAAUCCAGGAUAGGCU   | UCAAGU |
| hsa-miR-223*    | 4 | CGUGUAUUUGACAAGCUGAGUU   | GUGUAU |
| hsa-miR-223     | 4 | UGUCAGUUUGUCAAAUACCCCA   | GUCAGU |
| hsa-miR-222*    | 4 | CUCAGUAGCCAGUGUAGAUCU    | UCAGUA |
| hsa-miR-221*    | 4 | ACCUGGCAUACAAUGUAGAUUU   | CCUGGC |
| hsa-miR-220c    | 4 | ACACAGGGCUGUUGUGAAGACU   | CACAGG |
| hsa-miR-218-1*  | 4 | AUGGUUCCGUCAAGCACCAUGG   | UGGUUC |
| hsa-miR-218     | 4 | UUGUGCUUGAUCUAACCAUGU    | UGUGCU |
| hsa-miR-215     | 4 | AUGACCUAUGAAUUGACAGAC    | UGACCU |
| hsa-miR-212     | 4 | UAACAGUCUCCAGUCACGGCC    | AACAGU |
| hsa-miR-211     | 4 | UUCCCUUUGUCAUCCUUCGCCU   | UCCCUU |
| hsa-miR-20a     | 4 | UAAAGUGCUUAUAGUGCAGGUAG  | AAAGUG |
| hsa-miR-208b    | 4 | AUAAGACGAACAAAAGGUUUGU   | UAAGAC |
| hsa-miR-206     | 4 | UGGAAUGUAAGGAAGUGUGUGG   | GGAAUG |
| hsa-miR-202     | 4 | AGAGGUUAUAGGGCAUGGGAA    | GAGGUA |
| hsa-miR-200c    | 4 | UAAUACUGCCGGUAAUGAUGGA   | AAUACU |
| hsa-miR-200b    | 4 | UAAUACUGCCUGGUAAUGAUGA   | AAUACU |
| hsa-miR-200a    | 4 | UAACACUGUCUGGUAAACGAUGU  | AACACU |
| hsa-miR-19b-1*  | 4 | AGUUUUGCAGGUUUGCAUCCAGC  | GUUUUG |
| hsa-miR-199b-3p | 4 | ACAGUAGUCUGCACAUUGGUUA   | CAGUAG |
| hsa-miR-199a*   | 4 | ACAGUAGUCUGCACAUUGGUUA   | CAGUAG |
| hsa-miR-196a    | 4 | UAGGUAGUUUCAUGUUGUUGGG   | AGGUAG |
| hsa-miR-194     | 4 | UGUAACAGCAACUCCAUGUGGA   | GUAACA |
| hsa-miR-193b    | 4 | AACUGGCCCUCAAAGUCCCGCU   | ACUGGC |
| hsa-miR-193a    | 4 | AACUGGCCUACAAAGUCCAGU    | ACUGGC |
| hsa-miR-192     | 4 | CUGACCUAUGAAUUGACAGCC    | UGACCU |
| hsa-miR-191     | 4 | CAACGGAAUCCCAAAGCAGCUG   | AACGGA |
| hsa-miR-18b*    | 4 | UGCCCUAAAUGCCCUUCUGGC    | GCCCUA |
| hsa-miR-18b     | 4 | UAAGGUGCAUCUAGUGCAGUUAG  | AAGGUG |
| hsa-miR-18a     | 4 | UAAGGUGCAUCUAGUGCAGAUAG  | AAGGUG |
| hsa-miR-189     | 4 | UGCCUACUGAGCUGAUUCAGU    | GCCUAC |
| hsa-miR-185     | 4 | UGGAGAGAAAGGCAGUUCUGA    | GGAGAG |
| hsa-miR-182     | 4 | UUUGGCAAUGGUAGAACUCACACU | UUGGCA |
| hsa-miR-181c    | 4 | AACAUUCAACCGUCGGUGAGU    | ACAUUC |
| hsa-miR-17-3p   | 4 | ACUGCAGUGAAGGCACUUGUAG   | CUGCAG |
| hsa-miR-16      | 4 | UAGCAGCACGUAAAUAUUGGCG   | AGCAGC |
| hsa-miR-15a*    | 4 | CAGGCCAUAUUGUGCUGCCUCA   | AGGCCA |
| hsa-miR-155     | 4 | UUA AUGCUAAUCGUGAUAGGGGU | UAAUGC |
| hsa-miR-154     | 4 | UAGGUUAUCCGUGUUGCCUUCG   | AGGUUA |
| hsa-miR-152     | 4 | UCAGUGCAUGACAGAACUUGG    | CAGUGC |
| hsa-miR-151-5p  | 4 | UCGAGGAGCUCACAGUCUAGU    | CGAGGA |
| hsa-miR-151     | 4 | CUAGACUGAAGCUCCUUGAGG    | UAGACU |
| hsa-miR-149*    | 4 | AGGGAGGGACGGGGGCUGUGC    | GGGAGG |
| hsa-miR-148b*   | 4 | AAGUUCUGUUUAUACACUCAGGC  | AGUUCU |
| hsa-miR-148a    | 4 | UCAGUGCACUACAGAACUUUGU   | CAGUGC |
| hsa-miR-147b    | 4 | GUGUGCGGAAAUGCUUCUGCUA   | UGUGCG |
| hsa-miR-147     | 4 | GUGUGUGGAAAUGCUUCUGC     | UGUGUG |
| hsa-miR-146b-3p | 4 | UGCCCUUGUGGACUCAGUUCUGG  | GCCCUG |

|                 |   |                              |        |
|-----------------|---|------------------------------|--------|
| hsa-miR-146a*   | 4 | CCUCUGAAAUUCAGUUCUUCAG       | CUCUGA |
| hsa-miR-145*    | 4 | GGAUUCCUGGAAAUACUGUUCU       | GAUUCC |
| hsa-miR-144*    | 4 | GGUAUACAUCAUAUACUGUAAG       | GAUAUC |
| hsa-miR-143     | 4 | UGAGAUGAAGCACUGUAGCUC        | GAGAUG |
| hsa-miR-138-2*  | 4 | GCUAUUUCACGACACCAGGGUU       | CUAUUU |
| hsa-miR-138     | 4 | AGCUGGUGUUGUGAAUCAGGCCG      | GCUGGU |
| hsa-miR-137     | 4 | UUAUUGCUUAAGAAUACGCGUAG      | UAUUGC |
| hsa-miR-135b*   | 4 | AUGUAGGGCUAAAAGCCAUGGG       | UGUAGG |
| hsa-miR-135a    | 4 | UAUGGCUUUUUAUUCUAUGUGA       | AUGGCU |
| hsa-miR-133b    | 4 | UUUGGUCCCCUUAACCAGCUA        | UUGGUC |
| hsa-miR-133a    | 4 | UUUGGUCCCCUUAACCAGCUG        | UUGGUC |
| hsa-miR-132*    | 4 | ACCGUGGCUUUCGAUUGUUACU       | CCGUGG |
| hsa-miR-132     | 4 | UAACAGUCUACAGCCAUGGUCG       | AACAGU |
| hsa-miR-130a*   | 4 | UUCACAUUGUGCUACUGUCUGC       | UCACAU |
| hsa-miR-129     | 4 | CUUUUUGCGGUCUGGGCUUGC        | UUUUUG |
| hsa-miR-128     | 4 | UCACAGUGAACC GGUCUCUUU       | CACAGU |
| hsa-miR-127-5p  | 4 | CUGAAGCUCAGAGGGCUCUGAU       | UGAAGC |
| hsa-miR-126     | 4 | UCGUACCGUGAGUAAUAUUGCG       | CGUACC |
| hsa-miR-124*    | 4 | CGUGUUCACAGCGGACCUUGAU       | GUGUUC |
| hsa-miR-1233    | 4 | UGAGCCCUGUCCUCCCGCAG         | GAGCCC |
| hsa-miR-1229    | 4 | CUCUCACCACUGCCCUCACAG        | UCUCAC |
| hsa-miR-1228    | 4 | UCACACCUGCCUCGCCCCC          | CACACC |
| hsa-miR-1227    | 4 | CGUGCCACCCUUUUCCCCAG         | GUGCCA |
| hsa-miR-105*    | 4 | ACGGAUGUUUGAGCAUGUGCUA       | CGGAUG |
| hsa-miR-101*    | 4 | CAGUUUACACAGUGCUGAUGCU       | AGUUAU |
| hsa-miR-1       | 4 | UGGAAUGUAAAGAAGUAUGUAU       | GGAAUG |
| hsa-let-7i*     | 4 | CUGCGCAAGCUACUGCCUUGCU       | UGCGCA |
| hsa-let-7g*     | 4 | CUGUACAGGCCACUGCCUUGC        | UGUACA |
| hsa-let-7f-2*   | 4 | CUAUACAGUCUACUGUCUUUCC       | UAUACA |
| hsa-let-7f-1*   | 4 | CUAUACAAUCUAUUGCCUUCCC       | UAUACA |
| hsa-let-7f      | 4 | UGAGGUAGUAGAUUGUAUAGUU       | GAGGUA |
| hsa-let-7c*     | 4 | UAGAGUUACACCCUGGGAGUUA       | AGAGUU |
| hsa-miR-95      | 5 | UUCAACGGGUUUUAUUGAGCA        | UCAACG |
| hsa-miR-765     | 5 | UGGAGGAGAAGGAAGGUGAUG        | GGAGGA |
| hsa-miR-455     | 5 | UAUGUGCCUUUGGACUACAUCG       | AUGUGC |
| hsa-miR-340*    | 5 | UCCGUCUCAGUUACUUUAUAGC       | CCGUCU |
| hsa-miR-24-2*   | 5 | UGCCUACUGAGCUGAAACACAG       | GCCUAC |
| hsa-miR-941     | 6 | CACCCGGCUGUGUGCACAUGUGC      | ACCCGG |
| hsa-miR-105     | 6 | UCAAUUGCUCAGACUCCUGUGGU      | CAAUUG |
| hsa-miR-937     | 7 | AUCCGCGCUCUGACUCUCUGCC       | UCCGCG |
| hsa-miR-510     | 7 | UACUCAGGAGAGUGGCAAUCAC       | ACUCAG |
| hsa-miR-361-3p  | 7 | UCCCCCAGGUGUGAUUCUGAUUU      | CCCCCA |
| hsa-miR-328     | 7 | CUGGCCUCUCUGCCCUUCCGU        | UGGCCC |
| hsa-miR-136*    | 7 | CAUCAUCGUCUCAAUGAGUCU        | AUCAUC |
| hsa-miR-125a    | 7 | UCCCUGAGACCCUUUAACCUGUGA     | CCCUGA |
| hsa-miR-1224-5p | 7 | GUGAGGACUCGGGAGGUGG          | UGAGGA |
| hsa-miR-936     | 8 | ACAGUAGAGGGAGGAAUCGCAG       | CAGUAG |
| hsa-miR-935     | 8 | CCAGUUACCGCUUCCGCUACCGC      | CAGUUA |
| hsa-miR-876-5p  | 8 | UGGAUUUCUUUGUGAAUCACCA       | GGAUUU |
| hsa-miR-768-3p  | 8 | UCACAAUGCUGACACUCAAACUGCUGAC | CACAAU |
| hsa-miR-621     | 8 | GGCUAGCAACAGCGCUUACCU        | GCUAGC |
| hsa-miR-520g    | 8 | ACAAAGUGCUUCCUUUAGAGUGU      | CAAAGU |
| hsa-miR-518c*   | 8 | UCUCUGGAGGGAAGCACUUUCUG      | CUCUGG |
| hsa-miR-330-5p  | 8 | UCUCUGGGCCUGUGUCUUAGGC       | CUCUGG |
| hsa-miR-1226    | 8 | UCACCAGCCCUGUGUCCCUAG        | CACCAG |
| hsa-miR-106b    | 8 | UAAAGUGCUGACAGUGCAGAU        | AAAGUG |

|                  |    |                          |         |
|------------------|----|--------------------------|---------|
| hsa-miR-933      | 9  | UGUGCGCAGGGAGACCUCUCCC   | GUGCGC  |
| hsa-miR-302d     | 9  | UAAGUGCUUCCAUGUUUGAGUGU  | AAGUGC  |
| hsa-miR-101      | 9  | UACAGUACUGUGAUAACUGAA    | ACAGUA  |
| hsa-miR-93       | 10 | CAAAGUGCUGUUCGUGCAGGUAG  | AAAGUG  |
| hsa-miR-888      | 10 | UACUCAAAAAGCUGUCAGUCA    | ACUCA   |
| hsa-miR-654-3p   | 10 | UAUGUCUGCUGACCAUCACCUU   | AUGUCU  |
| hsa-miR-490      | 10 | CAACCUUGGAGGACUCCAUGCUG  | AACCUUG |
| hsa-miR-219-1-3p | 10 | AGAGUUGAGUCUGGACGUCCCG   | GAGUUG  |
| hsa-miR-155*     | 10 | CUCCUACAUUUAGCAUUAACA    | UCCUAC  |
| hsa-miR-92b      | 11 | UAUUGCACUCGUCCCGGCCUCC   | AUUGCA  |
| hsa-miR-653      | 11 | GUGUUGAAACAAUCUCUACUG    | UGUUGA  |
| hsa-miR-520c-5p  | 11 | CUCUAGAGGGAAAGCACUUUCUG  | UCUAGA  |
| hsa-miR-338-5p   | 11 | AACAUAUCCUGGUGCUGAGUG    | ACAAUA  |
| hsa-miR-924      | 12 | AGAGUCUUGUGAUGUCUUGC     | GAGUCU  |
| hsa-miR-9*       | 12 | AUAAAGCUAGAUACCGAAAGU    | UAAAGC  |
| hsa-miR-760      | 12 | CGGCUCUGGGUCUGUGGGGA     | GGCUCU  |
| hsa-miR-627      | 12 | GUGAGUCUCUAAGAAAAGAGGA   | UGAGUC  |
| hsa-miR-429      | 12 | UAAUACUGUCUGGUAAAACCGU   | AAUACU  |
| hsa-miR-378      | 12 | CUCCUGACUCCAGGUCCUGUGU   | UCCUGA  |
| hsa-miR-33b*     | 12 | CAGUGCCUCGGCAGUGCAGCCC   | AGUGCC  |
| hsa-miR-331      | 12 | GCCCCUGGGCCUAUCCUAGAA    | CCCCUG  |
| hsa-miR-23b      | 12 | AUCACAUUGCCAGGGAUUACC    | UCACAU  |
| hsa-miR-217      | 12 | UACUGCAUCAGGAACUGAUUGGA  | ACUGCA  |
| hsa-miR-210      | 12 | CUGUGCGUGUGACAGCGGCUGA   | UGUGCG  |
| hsa-miR-204      | 12 | UUCCCUUUGUCAUCCUAUGCCU   | UCCCUU  |
| hsa-miR-9        | 13 | UCUUUGGUUAUCUAGCUGUAUGA  | CUUUGG  |
| hsa-miR-508-5p   | 13 | UACUCCAGAGGGCGUCACUCAUG  | ACUCCA  |
| hsa-miR-502      | 13 | AUCCUUGCUAUCUGGGUGCUA    | UCCUUG  |
| hsa-miR-141*     | 13 | CAUCUUCAGUACAGUGUUGGA    | AUCUUC  |
| hsa-miR-892a     | 14 | CACUGUGUCCUUUCUGCGUAG    | ACUGUG  |
| hsa-miR-643      | 14 | ACUUGUAUGCUAGCUCAGGUAG   | CUUGUA  |
| hsa-miR-587      | 14 | UUUCCAUAAGGUGAUGAGUCAC   | UUCCAU  |
| hsa-miR-494      | 14 | UGAAACAUAACACGGGAAACCUC  | GAAACA  |
| hsa-miR-484      | 14 | UCAGGCUCAGUCCCCUCCGUAU   | CAGGCU  |
| hsa-miR-361      | 14 | UUAUCAGAAUCUCCAGGGGUAC   | UAUCAG  |
| hsa-miR-28-3p    | 14 | CACUAGAUUGUGAGCUCCUGGA   | ACUAGA  |
| hsa-miR-181d     | 14 | AACAUUCAUUGUUGUCGGUGGGU  | ACAUUC  |
| hsa-miR-149      | 14 | UCUGGCUCCGUGUCUUCACUCCC  | CUGGCU  |
| hsa-miR-148a*    | 14 | AAAGUUCUGAGACACUCCGACU   | AAGUUC  |
| hsa-miR-140-3p   | 14 | UACCACAGGGUAGAACCACGG    | ACCACA  |
| hsa-miR-106b*    | 14 | CCGCACUGUGGGUACUUGCUGC   | CGCACU  |
| hsa-let-7c       | 14 | UGAGGUAGUAGGUUGUAUGGUU   | GAGGUA  |
| hsa-miR-889      | 16 | UUAUAUCGGACAACCAUUGU     | UAAUAU  |
| hsa-miR-801      | 16 | GAUUGCUCUGCGUGCGGAAUCGAC | AUUGCU  |
| hsa-miR-502-3p   | 16 | AAUGCACCUGGGCAAGGAUUCA   | AUGCAC  |
| hsa-miR-487      | 16 | AAUCAUACAGGGACAUCCAGUU   | AUCAUA  |
| hsa-miR-485-3p   | 16 | GUCAUACACGGCUCUCCUCUCU   | UCAUAC  |
| hsa-miR-483      | 16 | UCACUCCUCUCCUCCCGUCUU    | CACUCC  |
| hsa-miR-32       | 16 | UAUUGCACAUUACUAAGUUGCA   | AUUGCA  |
| hsa-miR-224      | 16 | CAAGUCACUAGUGGUUCCGUU    | AAGUCA  |
| hsa-miR-220b     | 16 | CCACCACCGUGUCUGACACUU    | CACCAC  |
| hsa-miR-219-2-3p | 16 | AGAAUUGUGGCUGGACAUCUGU   | GAAUUG  |
| hsa-miR-197      | 16 | UUCACCACCUUCCACCCAGC     | UCACCA  |
| hsa-miR-181a-2*  | 16 | ACCACUGACCGUUGACUGUACC   | CCACUG  |
| hsa-miR-887      | 18 | GUGAACGGGCGCCAUCCCGAGG   | UGAACG  |
| hsa-miR-651      | 18 | UUUAGGAUAAGCUUGACUUUUG   | UUAGGA  |

|                 |    |                          |        |
|-----------------|----|--------------------------|--------|
| hsa-miR-641     | 18 | AAAGACAUAGGAUAGAGUCACCUC | AAGACA |
| hsa-miR-554     | 18 | GCUAGUCCUGACUCAGCCAGU    | CUAGUC |
| hsa-miR-411*    | 18 | UAUGUAACACGGUCCACUAACC   | AUGUAA |
| hsa-miR-410     | 18 | AAUAUAACACAGAUGGCCUGU    | AUAUAA |
| hsa-miR-369-5p  | 18 | AGAUCCGACCGUGUUUAUUCGC   | GAUCGA |
| hsa-miR-302c*   | 18 | UUUAACAUGGGGGUACCUGCUG   | UUAACA |
| hsa-miR-190b    | 18 | UGAUUAUGUUUGAUUUUGGGUU   | GAUAUG |
| hsa-miR-886-3p  | 19 | CGCGGGUGCUUACUGACCCUU    | GCGGGU |
| hsa-miR-875-5p  | 19 | UAUACCUCAGUUUUUUCAGGUG   | AUACCU |
| hsa-miR-626     | 19 | AGCUGUCUGAAAAUGUCUU      | GCUGUC |
| hsa-miR-574     | 19 | CACGCUCAUGCACACACCCACA   | ACGCUC |
| hsa-miR-551a    | 19 | GCGACCCACUCUUGGUUUCCA    | CGACCC |
| hsa-miR-193a-5p | 19 | UGGGUCUUUGCGGGCGAGAUGA   | GGGUCU |
| hsa-miR-146b    | 19 | UGAGAACUGAAUUCUAGGCU     | GAGAAC |
| hsa-miR-146a    | 19 | UGAGAACUGAAUUCUAGGGUU    | GAGAAC |
| hsa-miR-140     | 19 | CAGUGGUUUUACCCUAGGUAG    | AGUGGU |
| hsa-miR-876-3p  | 20 | UGGUGGUUUACAAAGUAAUUCA   | GGUGGU |
| hsa-miR-663     | 20 | AGGCGGGGCGCCGCGGGACCGC   | GGCGGG |
| hsa-miR-619     | 20 | GACCUUGACAUGUUUGUGCCAGU  | ACCUGG |
| hsa-miR-539     | 20 | GGAGAAUUUAUCCUUGGUGUGU   | GAGAAA |
| hsa-miR-513c    | 20 | UUCUCAAGGAGGUGUCGUUUAU   | UCUCA  |
| hsa-miR-450b-3p | 20 | UUGGGAUCAUUUUGCAUCCAUA   | UGGGAU |
| hsa-miR-33      | 20 | GUGCAUUGUAGUUGCAUUGCA    | UGCAUU |
| hsa-miR-128a    | 20 | UCACAGUGAACC GGUCUCUUU   | CACAGU |
| hsa-let-7e*     | 20 | CUAUACGGCCUCCUAGCUUUC    | UAUACG |
| hsa-miR-874     | 21 | CUGCCCUGGCCCGAGGGACCGA   | UGCCCU |
| hsa-miR-648     | 21 | AAGUGUGCAGGGCACUGGU      | AGUGUG |
| hsa-miR-629     | 21 | UGGGUUUACGUUGGGAGAACU    | GGGUUU |
| hsa-miR-524     | 21 | GAAGGCGCUUCCCUUUGGAGU    | AAGGCG |
| hsa-miR-376a*   | 21 | GUAGAUUCUCCUUCUAGAGUA    | UAGAUU |
| hsa-miR-29a     | 21 | UAGCACCAUCUGAAAUCGGUUA   | AGCACC |
| hsa-miR-222     | 21 | AGCUACAUCUGGCUACUGGGU    | GCUACA |
| hsa-miR-221     | 21 | AGCUACAUUGUCUGCUGGGUUUC  | GCUACA |
| hsa-miR-21*     | 21 | CAACACCAGUCGAUGGGCUGU    | AACACC |
| hsa-miR-20b     | 21 | CAAAGUGCUCUAGUGCAGGUAG   | AAAGUG |
| hsa-miR-208     | 21 | AUAAGACGAGCAAAAAGCUUGU   | UAAGAC |
| hsa-miR-138-1*  | 21 | GCUACUUCACAACACCAGGGCC   | CUACUU |
| hsa-miR-770-5p  | 22 | UCCAGUACCACGUGUCAGGGCCA  | CCAGUA |
| hsa-miR-602     | 22 | GACACGGGCGACAGCUGCGGCC   | ACACGG |
| hsa-miR-518a    | 22 | GAAAGCGCUUCCCUUUGCUGGA   | AAAGCG |
| hsa-miR-432     | 22 | UCUUGGAGUAGGUCAUUGGGUGG  | CUUGGA |
| hsa-miR-412     | 22 | ACUUCACCUGGUCCACUAGCCGU  | CUUCAC |
| hsa-miR-380-5p  | 22 | UGGUUGACCAUAGAACAUGC GC  | GGUUGA |
| hsa-miR-368     | 22 | AACAUAGAGGAAAUUCCACGU    | ACAUAG |
| hsa-miR-188-3p  | 22 | CUCCCACAUGCAGGGUUUGCA    | UCCCAC |
| hsa-miR-182*    | 22 | UGGUUCUAGACUUGCCAACUA    | GGUUCU |
| hsa-miR-10a*    | 22 | CAAUUUCGUUUCUAGGGGAAUA   | AAAUUC |
| hsa-miR-744*    | 23 | CUGUUGCCACUAACCUCUACCU   | UGUUGC |
| hsa-miR-618     | 23 | AAACUCUACUUGUCCUUCUGAGU  | AACUCU |
| hsa-miR-582-3p  | 23 | UAACUGGUUGAACAAACUGAACC  | AACUGG |
| hsa-miR-556-3p  | 23 | AUAUUACCAUAGCUCAUCUUU    | UAUUAC |
| hsa-miR-425-5p  | 23 | AAUGACACGAUCACUCCCGUUGA  | AUGACA |
| hsa-miR-33a*    | 23 | CAAUGUUUCCACAGUGCAUCAC   | AAUGUU |
| hsa-miR-30d*    | 23 | CUUUCAGUCAGAUGUUUGCUGC   | UUUCAG |
| hsa-miR-25      | 23 | CAUUGCACUUGUCUCGGUCUGA   | AUUGCA |
| hsa-miR-188     | 23 | CAUCCCUUGCAUGGUGGAGGG    | AUCCCU |



|                |    |                          |        |
|----------------|----|--------------------------|--------|
| hsa-miR-671    | 25 | AGGAAGCCCUUGGAGGGGCUGGAG | GGAAGC |
| hsa-miR-485-5p | 25 | AGAGGCUGGCCGUGAUGAAUUC   | GAGGCU |
| hsa-miR-190    | 25 | UGAUAUGUUUGAUAUAUUAGGU   | GAUAUG |
| hsa-miR-187    | 25 | UCGUGUCUUGUGUUGCAGCCGG   | CGUGUC |
| hsa-miR-184    | 25 | UGGACGGGAAACUGAUAAGGGU   | GGACGG |
| hsa-miR-650    | 27 | AGGAGGCAGCGCUCUCAGGAC    | GGAGGC |
| hsa-miR-625    | 27 | AGGGGGAAAGUUCUAUAGUCC    | GGGGGA |
| hsa-miR-636    | 28 | UGUGCUUGCUCGUCCCCGCCGCA  | GUGCUU |
| hsa-miR-495    | 28 | AAACAAACAUGGUGCACUUCUU   | AACAAA |
| hsa-miR-25*    | 28 | AGGCGGAGACUUGGGCAAUUG    | GGCGGA |
| hsa-miR-196b   | 28 | UAGGUAGUUUCCUGUUGUUGGG   | AGGUAG |
| hsa-miR-129-3p | 28 | AAGCCCUUACCCCAAAAAGCAU   | AGCCCU |
| hsa-miR-129*   | 28 | AAGCCCUUACCCCAAAAAGUAU   | AGCCCU |
| hsa-miR-122a   | 28 | UGGAGUGUGACAAUGGUGUUUG   | GGAGUG |
| hsa-miR-623    | 29 | AUCCCUUGCAGGGGCUGUUGGGU  | UCCCUU |
| hsa-miR-187*   | 29 | GGCUACAACACAGGACCCGGGC   | GCUACA |
| hsa-miR-613    | 30 | AGGAAUGUUCUUCUUGCC       | GGAAUG |
| hsa-miR-579    | 30 | UUCAUUUGGUAUAAACCGCGAUU  | UCAUUU |
| hsa-miR-585    | 35 | UGGGCGUAUCUGUAUGCUA      | GGGCGU |
| hsa-miR-576-3p | 35 | AAGAUGUGGAAAAAUUGGAAUC   | AGAUGU |
| hsa-miR-486-3p | 35 | CGGGGCAGCUCAGUACAGGAU    | GGGGCA |
| hsa-miR-409-3p | 35 | GAAUGUUGCUCGGUGAACCCCU   | AAUGUU |
| hsa-miR-324-5p | 35 | CGCAUCCCCUAGGGCAUUGGUGU  | GCAUCC |
| hsa-miR-195    | 35 | UAGCAGCACAGAAUAUUGGC     | AGCAGC |
| hsa-miR-15a    | 35 | UAGCAGCACAUAAUGGUUUUGUG  | AGCAGC |
| hsa-miR-584    | 36 | UUAUGGUUUUGCCUGGGACUGAG  | UAUGGU |
| hsa-miR-144    | 36 | UACAGUAUAGAUGAUGUACU     | ACAGUA |
| hsa-miR-541*   | 38 | AAAGGAUUCUGCUGUCGGUCCACU | AAGGAU |
| hsa-miR-512-5p | 38 | CACUCAGCCUUGAGGGCACUUUC  | ACUCAG |
| hsa-miR-422b   | 38 | ACUGGACUUGGAGUCAGAAGG    | CUGGAC |
| hsa-miR-302d*  | 38 | ACUUUAACAUGGAGGCACUUGC   | CUUUAA |
| hsa-miR-302b*  | 38 | ACUUUAACAUGGAAGUGCUUUC   | CUUUAA |
| hsa-miR-194*   | 38 | CCAGUGGGGCUGCUGUUUACUG   | CAGUGG |
| hsa-miR-153    | 38 | UUGCAUAGUCACAAAAGUGAUC   | UGCAUA |
| hsa-miR-10b*   | 38 | ACAGAUUCGAUUCUAGGGGAAU   | CAGAUU |
| hsa-miR-517*   | 40 | CCUCUAGAUGGAAGCACUGUCU   | CUCUAG |
| hsa-miR-15b    | 40 | UAGCAGCACAUCAUGGUUUACA   | AGCAGC |
| hsa-miR-425    | 44 | AUCGGGAAUGUCGUGUCCGCC    | UCGGGA |
| hsa-miR-34c    | 44 | AGGCAGUGUAGUUAGCUGAUUGC  | GGCAGU |
| hsa-miR-30c-2* | 44 | CUGGGAGAAGGCUGUUUACUCU   | UGGGAG |
| hsa-miR-296    | 44 | AGGGCCCCCCUCAAUCCUGU     | GGGCCC |
| hsa-miR-198    | 44 | GUCCAGAGGGGAGAUAGGUUC    | GUCCAG |
| hsa-miR-150    | 44 | UCUCCCAACCCUUGUACCAGUG   | CUCCA  |
| hsa-miR-337-5p | 46 | GAACGGCUUCAUACAGGAGUU    | AACGGC |
| hsa-miR-19b    | 46 | UGUGCAAUCCAUGCAAACUGA    | GUGCAA |
| hsa-miR-125b   | 59 | UCCUGAGACCCUAACUUGUGA    | CCCUGA |
| hsa-let-7b*    | 59 | CUAUACAACCUACUGCCUCCCC   | UAUACA |
| hsa-let-7a*    | 59 | CUAUACAUCUACUGUCUUUC     | UAUACA |

**Number of miRNAs**    **Number of groups**  
437                                33
