# Supplementary material for: A Network-Based Method to Assess the Statistical Significance of Mild Co-Regulation Effects
Source: PubMed Central journal article supplement (PMC3767771; doi:10.1371/journal.pone.0073413), 2013-09-09
Supplement: pone.0073413.s006.pdf [file pone.0073413.s006.pdf]

| Group index | miRNA            | Protein   | Section |
|-------------|------------------|-----------|---------|
| 1           | hsa-miR-517a     | mTOR      |         |
| 1           | hsa-miR-616      | mTOR      |         |
| 1           | hsa-miR-517b     | mTOR      |         |
| 1           | hsa-miR-517c     | mTOR      |         |
| 1           | hsa-miR-150*     | mTOR      |         |
| 1           | hsa-miR-100      | mTOR      |         |
| 1           | hsa-miR-127      | mTOR      |         |
| 1           | hsa-miR-34c-3p   | mTOR      |         |
| 1           | hsa-miR-515-5p   | mTOR      |         |
| 1           | hsa-miR-767-3p   | mTOR      |         |
| 1           | hsa-miR-99b      | mTOR      |         |
| 1           | hsa-miR-99a      | mTOR      |         |
| 2           | hsa-miR-922      | GSK3B     |         |
| 2           | hsa-miR-507      | GSK3B     |         |
| 2           | hsa-miR-24       | GSK3B     |         |
| 2           | hsa-miR-802      | GSK3B     |         |
| 2           | hsa-miR-214      | GSK3B     |         |
| 2           | hsa-miR-19b-1*   | GSK3B     |         |
| 2           | hsa-miR-215      | GSK3B     |         |
| 2           | hsa-miR-99a*     | GSK3B     |         |
| 2           | hsa-miR-452      | GSK3B     |         |
| 2           | hsa-miR-1231     | GSK3B     |         |
| 2           | hsa-miR-583      | GSK3B     |         |
| 2           | hsa-miR-632      | GSK3B     |         |
| 2           | hsa-miR-212      | GSK3B     |         |
| 3           | hsa-miR-455      | CDK2      |         |
| 3           | hsa-miR-18a      | CDK2      |         |
| 3           | hsa-miR-765      | CDK2      |         |
| 3           | hsa-miR-938      | CDK2      |         |
| 3           | hsa-miR-521      | CDK2      |         |
| 3           | hsa-miR-340*     | CDK2      |         |
| 3           | hsa-miR-196a*    | CDK2      |         |
| 3           | hsa-miR-610      | CDK2      |         |
| 4           | hsa-miR-621      | ERK2      |         |
| 4           | hsa-miR-520g     | ERK2      |         |
| 4           | hsa-miR-936      | ERK2      |         |
| 4           | hsa-miR-768-3p   | ERK2      |         |
| 4           | hsa-miR-1226     | ERK2      |         |
| 4           | hsa-miR-330-5p   | ERK2      |         |
| 4           | hsa-miR-584      | ERK2      |         |
| 4           | hsa-miR-518c*    | ERK2      |         |
| 4           | hsa-miR-876-5p   | ERK2      |         |
| 4           | hsa-miR-106b     | ERK2      |         |
| 4           | hsa-miR-935      | ERK2      |         |
| 5           | hsa-miR-491-3p   | Cyclin_D1 |         |
| 5           | hsa-miR-888      | Cyclin_D1 |         |
| 5           | hsa-miR-490      | Cyclin_D1 |         |
| 5           | hsa-miR-1228     | Cyclin_D1 |         |
| 5           | hsa-miR-219-1-3p | Cyclin_D1 |         |

|    |                 |           |  |
|----|-----------------|-----------|--|
| 5  | hsa-miR-155*    | Cyclin_D1 |  |
| 5  | hsa-miR-93      | Cyclin_D1 |  |
| 6  | hsa-miR-92b     | KRAS      |  |
| 6  | hsa-miR-545     | KRAS      |  |
| 6  | hsa-miR-575     | KRAS      |  |
| 6  | hsa-miR-520h    | KRAS      |  |
| 6  | hsa-miR-520c-5p | KRAS      |  |
| 7  | hsa-miR-627     | PLCG1     |  |
| 7  | hsa-miR-211     | PLCG1     |  |
| 7  | hsa-miR-924     | PLCG1     |  |
| 7  | hsa-miR-378     | PLCG1     |  |
| 7  | hsa-miR-429     | PLCG1     |  |
| 7  | hsa-miR-760     | PLCG1     |  |
| 7  | hsa-miR-33b*    | PLCG1     |  |
| 7  | hsa-miR-331     | PLCG1     |  |
| 8  | hsa-miR-921     | MIG_6     |  |
| 8  | hsa-miR-376a    | MIG_6     |  |
| 8  | hsa-miR-554     | MIG_6     |  |
| 8  | hsa-miR-369-5p  | MIG_6     |  |
| 8  | hsa-miR-103     | MIG_6     |  |
| 9  | hsa-miR-141*    | SHC1      |  |
| 9  | hsa-miR-9       | SHC1      |  |
| 9  | hsa-miR-502     | SHC1      |  |
| 9  | hsa-miR-133b    | SHC1      |  |
| 10 | hsa-let-7a*     | DUSP6     |  |
| 10 | hsa-miR-892a    | DUSP6     |  |
| 10 | hsa-miR-106b*   | DUSP6     |  |
| 10 | hsa-miR-28-3p   | DUSP6     |  |
| 10 | hsa-miR-181a    | DUSP6     |  |
| 10 | hsa-miR-199a    | DUSP6     |  |
| 10 | hsa-miR-148a*   | DUSP6     |  |
| 11 | hsa-miR-502-3p  | JNK1      |  |
| 11 | hsa-miR-224     | JNK1      |  |
| 11 | hsa-miR-32      | JNK1      |  |
| 11 | hsa-miR-197     | JNK1      |  |
| 11 | hsa-miR-181a-2* | JNK1      |  |
| 11 | hsa-miR-487     | JNK1      |  |
| 11 | hsa-miR-889     | JNK1      |  |
| 12 | hsa-miR-551b    | PIK3CA    |  |
| 12 | hsa-miR-888*    | PIK3CA    |  |
| 12 | hsa-miR-526b    | PIK3CA    |  |
| 12 | hsa-miR-526b*   | PIK3CA    |  |
| 13 | hsa-miR-193a-5p | EGFR      |  |
| 13 | hsa-miR-140     | EGFR      |  |
| 13 | hsa-miR-146b    | EGFR      |  |
| 13 | hsa-miR-146a    | EGFR      |  |
| 13 | hsa-miR-574     | EGFR      |  |
| 13 | hsa-miR-886-3p  | EGFR      |  |
| 13 | hsa-miR-579     | EGFR      |  |
| 13 | hsa-miR-493     | EGFR      |  |

|    |                 |       |  |
|----|-----------------|-------|--|
| 13 | hsa-miR-135a    | EGFR  |  |
| 13 | hsa-miR-206     | EGFR  |  |
| 13 | hsa-miR-626     | EGFR  |  |
| 14 | hsa-let-7e*     | p38   |  |
| 14 | hsa-miR-128     | p38   |  |
| 14 | hsa-miR-619     | p38   |  |
| 14 | hsa-miR-452*    | p38   |  |
| 14 | hsa-miR-876-3p  | p38   |  |
| 14 | hsa-miR-450b-3p | p38   |  |
| 14 | hsa-miR-18b*    | p38   |  |
| 15 | hsa-miR-376a*   | STAT3 |  |
| 15 | hsa-miR-202*    | STAT3 |  |
| 15 | hsa-miR-138-1*  | STAT3 |  |
| 15 | hsa-miR-298     | STAT3 |  |
| 15 | hsa-miR-21*     | STAT3 |  |
| 15 | hsa-miR-516-5p  | STAT3 |  |
| 15 | hsa-miR-665     | STAT3 |  |
| 15 | hsa-miR-29a     | STAT3 |  |
| 15 | hsa-miR-222     | STAT3 |  |
| 15 | hsa-miR-874     | STAT3 |  |
| 15 | hsa-miR-612     | STAT3 |  |
| 15 | hsa-miR-532-3p  | STAT3 |  |
| 15 | hsa-miR-221     | STAT3 |  |
| 15 | hsa-miR-648     | STAT3 |  |
| 15 | hsa-miR-29c     | STAT3 |  |
| 15 | hsa-miR-15a*    | STAT3 |  |
| 16 | hsa-miR-302d    | AKT1  |  |
| 16 | hsa-miR-516-3p  | AKT1  |  |
| 16 | hsa-miR-768-5p  | AKT1  |  |
| 16 | hsa-miR-373     | AKT1  |  |
| 16 | hsa-miR-101     | AKT1  |  |
| 17 | hsa-miR-19b     | PTEN  |  |
| 17 | hsa-miR-1227    | PTEN  |  |
| 17 | hsa-miR-582-3p  | PTEN  |  |
| 17 | hsa-miR-188     | PTEN  |  |
| 17 | hsa-miR-519e    | PTEN  |  |
| 17 | hsa-miR-30e-3p  | PTEN  |  |
| 17 | hsa-miR-25      | PTEN  |  |
| 17 | hsa-miR-744*    | PTEN  |  |
| 17 | hsa-miR-556-3p  | PTEN  |  |
| 17 | hsa-miR-371     | PTEN  |  |
| 18 | hsa-miR-495     | ERK1  |  |
| 18 | hsa-miR-636     | ERK1  |  |
| 18 | hsa-miR-185     | ERK1  |  |
| 18 | hsa-miR-222*    | ERK1  |  |
| 18 | hsa-miR-122a    | ERK1  |  |
| 18 | hsa-miR-431*    | ERK1  |  |
| 18 | hsa-miR-196b    | ERK1  |  |
| 18 | hsa-miR-27a*    | ERK1  |  |
| 18 | hsa-miR-671-3p  | ERK1  |  |

|    |                  |           |  |
|----|------------------|-----------|--|
| 18 | hsa-miR-129-3p   | ERK1      |  |
| 19 | hsa-miR-671      | AKT2      |  |
| 19 | hsa-miR-151-5p   | AKT2      |  |
| 19 | hsa-miR-485-5p   | AKT2      |  |
| 19 | hsa-miR-564      | AKT2      |  |
| 19 | hsa-miR-187      | AKT2      |  |
| 19 | hsa-miR-184      | AKT2      |  |
| 19 | hsa-miR-650      | AKT2      |  |
| 19 | hsa-miR-625      | AKT2      |  |
| 20 | hsa-miR-527      | CDK4      |  |
| 20 | hsa-miR-149*     | CDK4      |  |
| 20 | hsa-miR-425      | CDK4      |  |
| 20 | hsa-miR-628-5p   | CDK4      |  |
| 20 | hsa-miR-198      | CDK4      |  |
| 20 | hsa-miR-34c      | CDK4      |  |
| 21 | hsa-miR-328      | PTPN11    |  |
| 21 | hsa-miR-130a*    | PTPN11    |  |
| 21 | hsa-miR-601      | PTPN11    |  |
| 21 | hsa-miR-135b*    | PTPN11    |  |
| 21 | hsa-miR-605      | PTPN11    |  |
| 21 | hsa-miR-136*     | PTPN11    |  |
| 21 | hsa-miR-361-3p   | PTPN11    |  |
| 21 | hsa-miR-509-3-5p | PTPN11    |  |
| 21 | hsa-miR-510      | PTPN11    |  |
| 22 | hsa-miR-223      | Cyclin_D3 |  |
| 22 | hsa-miR-15a      | Cyclin_D3 |  |
| 22 | hsa-miR-422a     | Cyclin_D3 |  |
| 22 | hsa-miR-589      | Cyclin_D3 |  |
| 23 | hsa-miR-223*     | GRB2      |  |
| 23 | hsa-miR-221*     | GRB2      |  |
| 23 | hsa-miR-200a     | GRB2      |  |
| 23 | hsa-miR-567      | GRB2      |  |
| 23 | hsa-miR-422b     | GRB2      |  |
| 23 | hsa-miR-194*     | GRB2      |  |
| 23 | hsa-miR-146b-3p  | GRB2      |  |
| 23 | hsa-miR-302d*    | GRB2      |  |
| 23 | hsa-miR-512-5p   | GRB2      |  |
| 23 | hsa-miR-363*     | GRB2      |  |
| 23 | hsa-miR-132*     | GRB2      |  |
| 24 | hsa-miR-15b      | p27_Kip1  |  |
| 24 | hsa-miR-517*     | p27_Kip1  |  |
| 25 | hsa-miR-380-5p   | PIK3CB    |  |
| 25 | hsa-miR-412      | PIK3CB    |  |
| 26 | hsa-miR-365      | RB1       |  |
| 26 | hsa-miR-26a-2*   | RB1       |  |
| 27 | hsa-miR-552      | Cyclin_D3 |  |
| 27 | hsa-miR-552      | GRB2      |  |
| 27 | hsa-miR-297      | GRB2      |  |
| 27 | hsa-miR-297      | Cyclin_D3 |  |
| 27 | hsa-miR-744      | Cyclin_D3 |  |

|    |                |           |  |
|----|----------------|-----------|--|
| 27 | hsa-miR-744    | GRB2      |  |
| 28 | hsa-miR-520d*  | KRAS      |  |
| 28 | hsa-miR-520d*  | EGFR      |  |
| 28 | hsa-miR-661    | KRAS      |  |
| 28 | hsa-miR-661    | EGFR      |  |
| 29 | hsa-miR-588    | mTOR      |  |
| 29 | hsa-miR-588    | Cyclin_D3 |  |
| 29 | hsa-miR-635    | mTOR      |  |
| 29 | hsa-miR-635    | Cyclin_D3 |  |
| 30 | hsa-miR-623    | CDK2      |  |
| 30 | hsa-miR-623    | STAT3     |  |
| 30 | hsa-miR-187*   | CDK2      |  |
| 30 | hsa-miR-187*   | STAT3     |  |
| 31 | hsa-miR-148b*  | mTOR      |  |
| 31 | hsa-miR-148b*  | GRB2      |  |
| 31 | hsa-miR-581    | mTOR      |  |
| 31 | hsa-miR-581    | GRB2      |  |
| 32 | hsa-miR-191    | PIK3CB    |  |
| 32 | hsa-miR-191    | Cyclin_D3 |  |
| 32 | hsa-miR-450    | Cyclin_D3 |  |
| 32 | hsa-miR-450    | PIK3CB    |  |
| 33 | hsa-miR-96     | SHC1      |  |
| 33 | hsa-miR-96     | mTOR      |  |
| 33 | hsa-miR-202    | SHC1      |  |
| 33 | hsa-miR-202    | ERK1      |  |
| 33 | hsa-miR-202    | mTOR      |  |
| 34 | hsa-miR-496    | GSK3B     |  |
| 34 | hsa-miR-496    | mTOR      |  |
| 34 | hsa-miR-490-5p | AKT2      |  |
| 34 | hsa-miR-490-5p | GSK3B     |  |
| 34 | hsa-miR-490-5p | mTOR      |  |
| 34 | hsa-miR-523*   | GSK3B     |  |
| 34 | hsa-miR-523*   | mTOR      |  |
| 35 | hsa-miR-520f   | ERK2      |  |
| 35 | hsa-miR-520f   | p27_Kip1  |  |
| 35 | hsa-miR-515-3p | ERK2      |  |
| 35 | hsa-miR-515-3p | p27_Kip1  |  |
| 35 | hsa-miR-515-3p | PTEN      |  |
| 35 | hsa-miR-515-3p | PTEN      |  |
| 36 | hsa-miR-342    | KRAS      |  |
| 36 | hsa-miR-342    | GSK3B     |  |
| 36 | hsa-miR-342    | MIG_6     |  |
| 36 | hsa-miR-192    | KRAS      |  |
| 36 | hsa-miR-192    | GSK3B     |  |
| 37 | hsa-miR-147b   | mTOR      |  |
| 37 | hsa-miR-147b   | MIG_6     |  |
| 37 | hsa-miR-154    | MIG_6     |  |
| 37 | hsa-miR-154    | mTOR      |  |
| 37 | hsa-miR-154    | AKT1      |  |
| 38 | hsa-miR-590    | KRAS      |  |

|    |                |           |     |
|----|----------------|-----------|-----|
| 38 | hsa-miR-590    | STAT3     | II  |
| 38 | hsa-miR-593*   | GRB2      | II  |
| 38 | hsa-miR-593*   | KRAS      | II  |
| 38 | hsa-miR-593*   | STAT3     | II  |
| 38 | hsa-miR-593*   | Cyclin_D1 | II  |
| 39 | hsa-miR-550    | PIK3CA    | II  |
| 39 | hsa-miR-550    | p38       | II  |
| 39 | hsa-miR-550    | PTPN11    | II  |
| 39 | hsa-miR-200c   | PIK3CA    | II  |
| 39 | hsa-miR-200c   | PLCG1     | II  |
| 39 | hsa-miR-200c   | PTPN11    | II  |
| 39 | hsa-miR-522    | PIK3CA    | II  |
| 39 | hsa-miR-522    | PTPN11    | II  |
| 39 | hsa-miR-489    | PTPN11    | II  |
| 39 | hsa-miR-489    | p38       | II  |
| 39 | hsa-miR-200b   | PIK3CA    | II  |
| 39 | hsa-miR-200b   | PLCG1     | II  |
| 40 | hsa-miR-519c   | ERK2      | II  |
| 40 | hsa-miR-519c   | PTEN      | II  |
| 40 | hsa-miR-519c   | PIK3CA    | II  |
| 40 | hsa-miR-519c   | ERK1      | II  |
| 40 | hsa-miR-483-5p | PTPN11    | II  |
| 40 | hsa-miR-483-5p | GRB2      | II  |
| 40 | hsa-miR-483-5p | ERK1      | II  |
| 40 | hsa-miR-483-5p | PIK3CA    | II  |
| 40 | hsa-miR-483-5p | RB1       | II  |
| 40 | hsa-miR-483-5p | ERK2      | II  |
| 41 | hsa-miR-491    | AKT2      | II  |
| 41 | hsa-miR-491    | CDK4      | II  |
| 41 | hsa-miR-491    | PTPN11    | II  |
| 41 | hsa-miR-491    | ERK1      | II  |
| 41 | hsa-miR-491    | mTOR      | II  |
| 41 | hsa-miR-491    | EGFR      | II  |
| 41 | hsa-miR-592    | mTOR      | II  |
| 41 | hsa-miR-592    | EGFR      | II  |
| 41 | hsa-miR-592    | PTPN11    | II  |
| 41 | hsa-miR-544    | mTOR      | II  |
| 41 | hsa-miR-544    | EGFR      | II  |
| 41 | hsa-miR-127-5p | EGFR      | II  |
| 41 | hsa-miR-127-5p | PIK3CA    | II  |
| 41 | hsa-miR-127-5p | Cyclin_D1 | II  |
| 41 | hsa-miR-127-5p | mTOR      | II  |
| 41 | hsa-miR-421    | PTPN11    | II  |
| 41 | hsa-miR-421    | EGFR      | II  |
| 41 | hsa-miR-421    | mTOR      | II  |
| 42 | hsa-let-7c*    | GSK3B     | III |
| 42 | hsa-let-7c*    | SHC1      | III |
| 42 | hsa-miR-520a   | ERK2      | III |
| 42 | hsa-miR-520a   | CDK4      | III |
| 42 | hsa-miR-520a   | PIK3CA    | III |

|    |                 |           |     |
|----|-----------------|-----------|-----|
| 42 | hsa-miR-520a    | AKT1      | III |
| 42 | hsa-let-7f-1*   | p38       | III |
| 42 | hsa-let-7f-1*   | GSK3B     | III |
| 42 | hsa-let-7f      | Cyclin_D3 | III |
| 42 | hsa-let-7f      | RB1       | III |
| 42 | hsa-let-7f      | AKT1      | III |
| 42 | hsa-let-7f      | Cyclin_D1 | III |
| 42 | hsa-let-7g*     | GSK3B     | III |
| 42 | hsa-let-7g*     | EGFR      | III |
| 42 | hsa-let-7i*     | AKT1      | III |
| 42 | hsa-let-7i*     | PTEN      | III |
| 42 | hsa-miR-640     | ERK1      | III |
| 42 | hsa-miR-640     | Cyclin_D1 | III |
| 42 | hsa-miR-640     | GSK3B     | III |
| 42 | hsa-miR-105*    | JNK1      | III |
| 42 | hsa-miR-105*    | STAT3     | III |
| 42 | hsa-miR-105*    | STAT3     | III |
| 42 | hsa-miR-199b-3p | MIG_6     | III |
| 42 | hsa-miR-199b-3p | SHC1      | III |
| 42 | hsa-miR-199b-3p | PIK3CA    | III |
| 42 | hsa-miR-199b-3p | JNK1      | III |
| 42 | hsa-let-7f-2*   | GSK3B     | III |
| 42 | hsa-let-7f-2*   | JNK1      | III |
| 42 | hsa-miR-433     | GRB2      | III |
| 42 | hsa-miR-433     | p38       | III |
| 42 | hsa-miR-433     | JNK1      | III |
| 42 | hsa-miR-126     | AKT2      | III |
| 42 | hsa-miR-126     | EGFR      | III |
| 42 | hsa-miR-642     | AKT1      | III |
| 42 | hsa-miR-642     | Cyclin_D3 | III |
| 42 | hsa-miR-642     | PTEN      | III |
| 42 | hsa-miR-449b    | CDK4      | III |
| 42 | hsa-miR-449b    | PLCG1     | III |
| 42 | hsa-miR-525     | CDK4      | III |
| 42 | hsa-miR-525     | PLCG1     | III |
| 42 | hsa-miR-525     | RB1       | III |
| 42 | hsa-miR-525     | Cyclin_D3 | III |
| 42 | hsa-miR-766     | Cyclin_D3 | III |
| 42 | hsa-miR-766     | AKT1      | III |
| 42 | hsa-miR-148a    | PIK3CA    | III |
| 42 | hsa-miR-148a    | MIG_6     | III |
| 42 | hsa-miR-132     | MIG_6     | III |
| 42 | hsa-miR-132     | GSK3B     | III |
| 42 | hsa-miR-132     | ERK1      | III |
| 42 | hsa-miR-132     | PIK3CA    | III |
| 42 | hsa-miR-132     | RB1       | III |
| 42 | hsa-miR-541     | SHC1      | III |
| 42 | hsa-miR-541     | CDK4      | III |
| 42 | hsa-miR-541     | PIK3CA    | III |
| 42 | hsa-miR-542-3p  | Cyclin_D3 | III |

|    |                |           |     |
|----|----------------|-----------|-----|
| 42 | hsa-miR-542-3p | CDK2      | III |
| 42 | hsa-miR-218-1* | Cyclin_D1 | III |
| 42 | hsa-miR-218-1* | MIG_6     | III |
| 42 | hsa-miR-218-1* | PIK3CA    | III |
| 42 | hsa-miR-137    | AKT2      | III |
| 42 | hsa-miR-137    | EGFR      | III |
| 42 | hsa-miR-548d   | CDK2      | III |
| 42 | hsa-miR-548d   | AKT1      | III |
| 42 | hsa-miR-138-2* | Cyclin_D1 | III |
| 42 | hsa-miR-138-2* | GSK3B     | III |
| 42 | hsa-miR-138-2* | STAT3     | III |
| 42 | hsa-miR-155    | SHC1      | III |
| 42 | hsa-miR-155    | EGFR      | III |
| 42 | hsa-miR-155    | GSK3B     | III |
| 42 | hsa-miR-329    | CDK4      | III |
| 42 | hsa-miR-329    | PIK3CB    | III |
| 42 | hsa-miR-329    | RB1       | III |
| 42 | hsa-miR-329    | AKT2      | III |
| 42 | hsa-miR-329    | AKT2      | III |
| 42 | hsa-miR-144*   | AKT2      | III |
| 42 | hsa-miR-144*   | PIK3CA    | III |
| 42 | hsa-miR-144*   | PTPN11    | III |
| 42 | hsa-miR-144*   | RB1       | III |
| 42 | hsa-miR-144*   | SHC1      | III |
| 42 | hsa-miR-144*   | GSK3B     | III |
| 42 | hsa-miR-520e   | AKT1      | III |
| 42 | hsa-miR-520e   | ERK2      | III |
| 42 | hsa-miR-145*   | GRB2      | III |
| 42 | hsa-miR-145*   | STAT3     | III |
| 42 | hsa-miR-145*   | JNK1      | III |
| 42 | hsa-miR-562    | Cyclin_D1 | III |
| 42 | hsa-miR-562    | JNK1      | III |
| 42 | hsa-miR-499-3p | Cyclin_D1 | III |
| 42 | hsa-miR-499-3p | JNK1      | III |
| 42 | hsa-miR-499-3p | PLCG1     | III |
| 42 | hsa-miR-299-5p | AKT2      | III |
| 42 | hsa-miR-299-5p | Cyclin_D3 | III |
| 42 | hsa-miR-299-5p | RB1       | III |
| 42 | hsa-miR-147    | AKT2      | III |
| 42 | hsa-miR-147    | CDK2      | III |
| 42 | hsa-miR-147    | CDK4      | III |
| 42 | hsa-miR-147    | RB1       | III |
| 42 | hsa-miR-147    | Cyclin_D1 | III |
| 42 | hsa-miR-302a   | Cyclin_D3 | III |
| 42 | hsa-miR-302a   | CDK2      | III |
| 42 | hsa-miR-302a   | ERK2      | III |
| 42 | hsa-miR-302a   | PTEN      | III |
| 42 | hsa-miR-302a   | AKT1      | III |
| 42 | hsa-miR-34a    | PLCG1     | III |
| 42 | hsa-miR-34a    | CDK4      | III |



|    |                |           |     |
|----|----------------|-----------|-----|
| 42 | hsa-miR-34a    | GSK3B     | III |
| 42 | hsa-miR-34a*   | DUSP6     | III |
| 42 | hsa-miR-34a*   | MIG_6     | III |
| 42 | hsa-miR-509-3p | DUSP6     | III |
| 42 | hsa-miR-509-3p | CDK2      | III |
| 42 | hsa-miR-509-3p | CDK2      | III |
| 42 | hsa-miR-509-3p | PTEN      | III |
| 42 | hsa-miR-509-3p | PTEN      | III |
| 42 | hsa-miR-30b*   | AKT1      | III |
| 42 | hsa-miR-30b*   | CDK4      | III |
| 42 | hsa-miR-30b*   | PLCG1     | III |
| 42 | hsa-miR-151    | AKT1      | III |
| 42 | hsa-miR-151    | CDK4      | III |
| 42 | hsa-miR-151    | DUSP6     | III |
| 42 | hsa-miR-151    | EGFR      | III |
| 42 | hsa-miR-151    | GSK3B     | III |
| 42 | hsa-miR-151    | PTPN11    | III |
| 42 | hsa-miR-323    | STAT3     | III |
| 42 | hsa-miR-323    | JNK1      | III |
| 42 | hsa-miR-323-5p | PIK3CA    | III |
| 42 | hsa-miR-323-5p | RB1       | III |
| 42 | hsa-miR-326    | MIG_6     | III |
| 42 | hsa-miR-326    | PIK3CA    | III |
| 42 | hsa-miR-193b   | CDK4      | III |
| 42 | hsa-miR-193b   | RB1       | III |
| 42 | hsa-miR-193b   | CDK2      | III |
| 42 | hsa-miR-16     | Cyclin_D3 | III |
| 42 | hsa-miR-16     | ERK1      | III |
| 42 | hsa-miR-16     | Cyclin_D3 | III |
| 42 | hsa-miR-16     | CDK4      | III |
| 42 | hsa-miR-16     | RB1       | III |
| 42 | hsa-miR-17-3p  | AKT2      | III |
| 42 | hsa-miR-17-3p  | EGFR      | III |
| 42 | hsa-miR-17-3p  | PIK3CA    | III |
| 42 | hsa-miR-17-3p  | PIK3CB    | III |
| 42 | hsa-miR-17-3p  | RB1       | III |
| 42 | hsa-miR-342-5p | CDK4      | III |
| 42 | hsa-miR-342-5p | AKT2      | III |
| 42 | hsa-miR-342-5p | PIK3CA    | III |
| 42 | hsa-miR-181c   | DUSP6     | III |
| 42 | hsa-miR-181c   | PIK3CA    | III |
| 42 | hsa-miR-346    | p38       | III |
| 42 | hsa-miR-346    | GSK3B     | III |
| 42 | hsa-miR-34b*   | CDK4      | III |
| 42 | hsa-miR-34b*   | GSK3B     | III |
| 42 | hsa-miR-34b*   | RB1       | III |
| 42 | hsa-miR-18b    | AKT1      | III |
| 42 | hsa-miR-18b    | ERK2      | III |
| 42 | hsa-miR-631    | GSK3B     | III |
| 42 | hsa-miR-631    | EGFR      | III |

|    |                 |           |     |
|----|-----------------|-----------|-----|
| 42 | hsa-miR-520a*   | DUSP6     | III |
| 42 | hsa-miR-520a*   | JNK1      | III |
| 42 | hsa-miR-520a*   | PIK3CA    | III |
| 42 | hsa-miR-193a    | Cyclin_D1 | III |
| 42 | hsa-miR-193a    | CDK4      | III |
| 42 | hsa-miR-193a    | MIG_6     | III |
| 42 | hsa-miR-193a    | JNK1      | III |
| 42 | hsa-miR-193a    | PIK3CA    | III |
| 42 | hsa-miR-520c    | ERK2      | III |
| 42 | hsa-miR-520c    | AKT1      | III |
| 42 | hsa-miR-637     | STAT3     | III |
| 42 | hsa-miR-637     | p27_Kip1  | III |
| 42 | hsa-miR-637     | GRB2      | III |
| 42 | hsa-miR-520d    | ERK2      | III |
| 42 | hsa-miR-520d    | AKT1      | III |
| 42 | hsa-miR-518a-5p | CDK4      | III |
| 42 | hsa-miR-518a-5p | CDK4      | III |
| 42 | hsa-miR-518a-5p | DUSP6     | III |
| 42 | hsa-miR-518a-5p | PTPN11    | III |
| 42 | hsa-miR-644     | AKT2      | III |
| 42 | hsa-miR-644     | PIK3CA    | III |
| 42 | hsa-miR-644     | EGFR      | III |
| 42 | hsa-miR-558     | RB1       | III |
| 42 | hsa-miR-558     | Cyclin_D3 | III |
| 42 | hsa-miR-558     | CDK4      | III |
| 42 | hsa-miR-519a    | CDK2      | III |
| 42 | hsa-miR-519a    | AKT1      | III |
| 42 | hsa-miR-519a    | ERK1      | III |
| 42 | hsa-miR-519a    | PTEN      | III |
| 42 | hsa-miR-519a    | CDK2      | III |
| 42 | hsa-miR-449     | CDK4      | III |
| 42 | hsa-miR-449     | PLCG1     | III |
| 42 | hsa-miR-524*    | JNK1      | III |
| 42 | hsa-miR-524*    | EGFR      | III |
| 42 | hsa-miR-524*    | DUSP6     | III |
| 42 | hsa-miR-509     | PTEN      | III |
| 42 | hsa-miR-509     | CDK2      | III |
| 42 | hsa-miR-519b-5p | RB1       | III |
| 42 | hsa-miR-519b-5p | AKT2      | III |
| 42 | hsa-miR-519b-5p | Cyclin_D1 | III |
| 42 | hsa-miR-208b    | JNK1      | III |
| 42 | hsa-miR-208b    | STAT3     | III |
| 42 | hsa-miR-769-5p  | GSK3B     | III |
| 42 | hsa-miR-769-5p  | SHC1      | III |
| 42 | hsa-miR-769-5p  | RB1       | III |
| 42 | hsa-miR-769-5p  | JNK1      | III |
| 42 | hsa-miR-769-5p  | MIG_6     | III |
| 42 | hsa-miR-31      | GRB2      | III |
| 42 | hsa-miR-31      | CDK2      | III |
| 42 | hsa-miR-31      | JNK1      | III |

|    |                |           |     |
|----|----------------|-----------|-----|
| 42 | hsa-miR-486    | DUSP6     | III |
| 42 | hsa-miR-486    | MIG_6     | III |
| 42 | hsa-miR-486    | PIK3CA    | III |
| 42 | hsa-miR-877*   | Cyclin_D1 | III |
| 42 | hsa-miR-877*   | PLCG1     | III |
| 42 | hsa-miR-877*   | CDK4      | III |
| 42 | hsa-miR-885-3p | AKT2      | III |
| 42 | hsa-miR-885-3p | CDK4      | III |
| 42 | hsa-miR-26a    | PTEN      | III |
| 42 | hsa-miR-26a    | ERK1      | III |
| 42 | hsa-miR-26a    | PTEN      | III |
| 42 | hsa-miR-892b   | MIG_6     | III |
| 42 | hsa-miR-892b   | RB1       | III |
| 42 | hsa-miR-892b   | KRAS      | III |
| 42 | hsa-miR-892b   | PIK3CA    | III |
| 42 | hsa-miR-892b   | Cyclin_D1 | III |
| 42 | hsa-miR-892b   | CDK4      | III |
| 42 | hsa-miR-892b   | CDK2      | III |
| 42 | hsa-miR-338    | PIK3CA    | III |
| 42 | hsa-miR-338    | JNK1      | III |
| 42 | hsa-miR-338    | MIG_6     | III |
| 42 | hsa-miR-519a*  | RB1       | III |
| 42 | hsa-miR-519a*  | CDK2      | III |
| 42 | hsa-miR-569    | Cyclin_D1 | III |
| 42 | hsa-miR-569    | JNK1      | III |
| 42 | hsa-miR-569    | ERK2      | III |
| 42 | hsa-miR-940    | CDK4      | III |
| 42 | hsa-miR-940    | STAT3     | III |
| 42 | hsa-miR-940    | GSK3B     | III |
| 42 | hsa-miR-624*   | SHC1      | III |
| 42 | hsa-miR-624*   | GSK3B     | III |
| 42 | hsa-miR-624*   | AKT2      | III |
| 42 | hsa-miR-624*   | EGFR      | III |
| 42 | hsa-miR-372    | AKT1      | III |
| 42 | hsa-miR-372    | ERK2      | III |
| 42 | hsa-miR-372    | PTPN11    | III |
| 42 | hsa-miR-582    | JNK1      | III |
| 42 | hsa-miR-582    | GSK3B     | III |
| 42 | hsa-miR-511    | CDK2      | III |
| 42 | hsa-miR-511    | PTEN      | III |
| 42 | hsa-miR-511    | PTEN      | III |
| 42 | hsa-miR-634    | GSK3B     | III |
| 42 | hsa-miR-634    | STAT3     | III |
| 42 | hsa-miR-634    | GRB2      | III |
| 42 | hsa-miR-520b   | AKT1      | III |
| 42 | hsa-miR-520b   | PTEN      | III |
| 42 | hsa-miR-520b   | ERK2      | III |
| 42 | hsa-miR-629*   | GSK3B     | III |
| 42 | hsa-miR-629*   | p38       | III |
| 42 | hsa-miR-629*   | STAT3     | III |

|    |               |           |     |
|----|---------------|-----------|-----|
| 42 | hsa-miR-608   | PIK3CA    | III |
| 42 | hsa-miR-608   | DUSP6     | III |
| 42 | hsa-miR-608   | PIK3CB    | III |
| 42 | hsa-miR-608   | Cyclin_D1 | III |
| 42 | hsa-miR-532   | Cyclin_D1 | III |
| 42 | hsa-miR-532   | CDK2      | III |
| 42 | hsa-miR-519b  | CDK2      | III |
| 42 | hsa-miR-519b  | ERK2      | III |
| 42 | hsa-miR-518e* | CDK4      | III |
| 42 | hsa-miR-518e* | PTPN11    | III |
| 42 | hsa-miR-518e* | GSK3B     | III |
| 42 | hsa-miR-566   | STAT3     | III |
| 42 | hsa-miR-566   | CDK4      | III |
| 42 | hsa-miR-555   | RB1       | III |
| 42 | hsa-miR-555   | DUSP6     | III |
| 42 | hsa-miR-555   | Cyclin_D1 | III |
| 42 | hsa-miR-624   | RB1       | III |
| 42 | hsa-miR-624   | Cyclin_D1 | III |
