# Supplementary material for: A Network-Based Method to Assess the Statistical Significance of Mild Co-Regulation Effects
Source: PubMed Central journal article supplement (PMC3767771; doi:10.1371/journal.pone.0073413), 2013-09-09
Supplement: pone.0073413.s007.pdf [file pone.0073413.s007.pdf]

| group | family  | group count | family count | family in group | family members                                                             | p.hyper  | fdr.hyper | p.perm | $\tau_B$ |
|-------|---------|-------------|--------------|-----------------|----------------------------------------------------------------------------|----------|-----------|--------|----------|
| 1     | mir-99  | 11          | 5            | 2               | hsa-miR-99a*<br>hsa-miR-99b*                                               | 9.23E-05 | 3.85E-03  | 0.009  | 1.64     |
| 2     | mir-99  | 8           | 5            | 2               | hsa-miR-100<br>hsa-miR-99b                                                 | 3.16E-05 | 1.40E-03  | 0.001  | 1.64     |
| 18    | mir-154 | 9           | 11           | 2               | hsa-miR-369-5p<br>hsa-miR-410                                              | 7.37E-04 | 2.35E-02  | 0.027  | 1.64     |
| 19    | mir-146 | 9           | 4            | 2               | hsa-miR-146a<br>hsa-miR-146b                                               | 1.91E-05 | 8.79E-04  | 0      | 1.64     |
| 21    | mir-221 | 12          | 4            | 2               | hsa-miR-221<br>hsa-miR-222                                                 | 4.98E-05 | 2.20E-03  | 0.001  | 1.64     |
| 28    | mir-129 | 7           | 3            | 2               | hsa-miR-129*<br>hsa-miR-129-3p                                             | 2.01E-06 | 9.72E-05  | 0      | 1.64     |
| 35    | mir-15  | 7           | 5            | 2               | hsa-miR-15a<br>hsa-miR-195                                                 | 1.98E-05 | 9.07E-04  | 0.004  | 1.64     |
| 38    | mir-302 | 8           | 5            | 2               | hsa-miR-302b*<br>has-miR-302d*                                             | 3.16E-05 | 1.40E-03  | 0.001  | 1.64     |
| 59    | let-7   | 3           | 9            | 2               | hsa-let-7a*<br>hsa-let-7b*                                                 | 4.82E-06 | 2.32E-04  | 0.001  | 1.64     |
| 1     | mir-99  | 12          | 4            | 3               | hsa-miR-100<br>hsa-miR-99a<br>hsa-miR-99b                                  | 7.96E-07 | 4.55E-05  | 0.001  | 1.96     |
| 5     | let-7   | 90          | 7            | 5               | hsa-let-7f<br>hsa-let-7f-1*<br>hsa-let-7f-2*<br>hsa-let-7g*<br>hsa-let-7i* | 1.39E-03 | 2.17E-02  | 0.029  | 1.96     |
| 17    | mir-146 | 11          | 3            | 2               | hsa-miR-146a<br>hsa-miR-146b                                               | 2.31E-05 | 1.23E-03  | 0.005  | 1.96     |
| 19    | mir-221 | 16          | 4            | 2               | hsa-miR-221<br>hsa-miR-222                                                 | 3.05E-04 | 1.47E-02  | 0.011  | 1.96     |
| 19    | mir-29  | 16          | 2            | 2               | hsa-miR-29a<br>hsa-miR-29c                                                 | 0.00E+00 | 0.00E+00  | 0.001  | 1.96     |
| 33    | mir-506 | 9           | 7            | 2               | hsa-miR-509-3-5p<br>hsa-miR-510                                            | 3.91E-04 | 1.80E-02  | 0.018  | 1.96     |
| 42    | mir-8   | 5           | 5            | 2               | hsa-miR-200b<br>hsa-miR-200c                                               | 1.39E-05 | 7.87E-04  | 0.001  | 1.96     |
| 45    | mir-515 | 2           | 61           | 2               | hsa-miR-515-3p<br>hsa-miR-520f                                             | 0.00E+00 | 0.00E+00  | 0.021  | 1.96     |
| 1     | mir-99  | 7           | 2            | 2               | hsa-miR-100<br>hsa-miR-99a                                                 | 0.00E+00 | 0.00E+00  | 0.003  | 2.58     |
| 4     | mir-34  | 5           | 2            | 2               | hsa-miR-34a<br>hsa-miR-34b*                                                | 0.00E+00 | 0.00E+00  | 0      | 2.58     |
| 7     | mir-8   | 7           | 4            | 3               | hsa-miR-200b<br>hsa-miR-200c<br>hsa-miR-429                                | 1.40E-06 | 5.08E-05  | 0      | 2.58     |
| 13    | mir-29  | 11          | 2            | 2               | hsa-miR-29a<br>hsa-miR-29c                                                 | 0.00E+00 | 0.00E+00  | 0.004  | 2.58     |
| 25    | mir-146 | 11          | 2            | 2               | hsa-miR-146a<br>hsa-miR-146b                                               | 0.00E+00 | 0.00E+00  | 0.011  | 2.58     |
| 45    | mir-506 | 3           | 6            | 2               | hsa-miR-509<br>hsa-miR-509-3p                                              | 3.10E-05 | 1.11E-03  | 0.005  | 2.58     |
